# Supplementary material for: A-to-I RNA Editing Affects lncRNAs Expression after Heat Shock
Source: Preprints.org preprint supplement (doi:10.20944/preprints201811.0177.v1), 2018-11-07
Supplement: Supplementary file 1 [file supplementary]

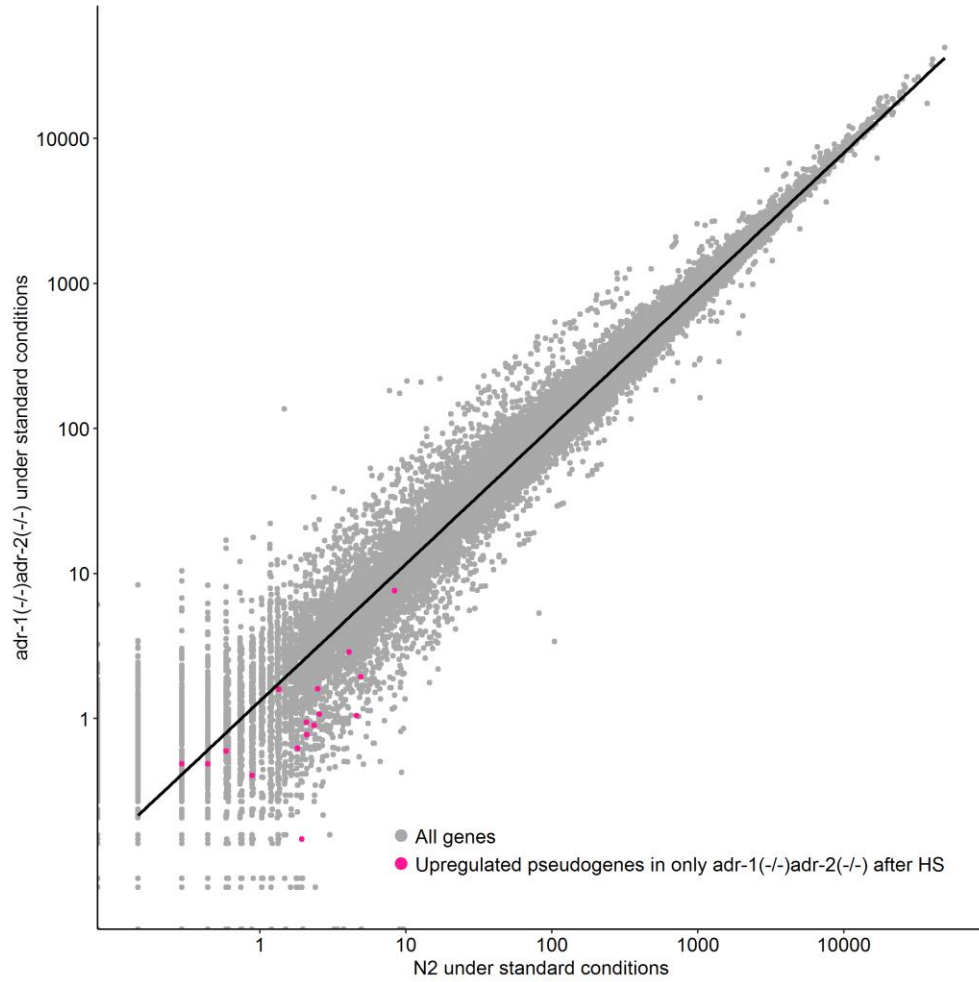

**Figure S1.** Pseudogenes that were upregulated in the ADAR mutants under heat shock are downregulated in the ADAR mutants under standard conditions. Log scale plots presenting normalized gene counts of at least three biological samples in ADAR mutant worms against wild-type (N2) worms, under standard conditions. Grey dots represent all genes, pink dots represent pseudogenes and lncRNAs that were upregulated in ADAR mutants under heat shock, and the black line is the regression line for all genes.
