# Supplementary material for: A-to-I RNA Editing Affects lncRNAs Expression after Heat Shock
Source: Preprints.org preprint supplement (doi:10.20944/preprints201811.0177.v1), 2018-11-07
Supplement: Supplementary file 1 [file Supplementary Material File S1.xlsx]

## Sheet: Legened
Column	Description
A	Gene name
B and E	log2FoldChange of normalized gene expression after heat shock versus standard conditions in ADAR mutant on B and in the wildtype on E
C and F	P value for gene expression change after heat shock in ADAR mutant on C and in the wildtype in F
D and G	P adjusted in ADAR mutant on D and in the wildtype in G
H	Differentially expressed (DE) genes. Both, DE genes in both strains; ADARmutant,DE genes which are specific to ADAR mutants;N2,DE genes which are specific to N2; -, not a DE gene.

## Sheet: DE analysis results
Gene	log2FoldChange.ADARmutant	pvalue.ADARmutant	padj.ADARmutant	log2FoldChange.N2	pvalue.N2	padj.N2	DE genes
W04A4.2|W04A4.2|W04A4.2	1.32967e-05	0.999944	0.999944	0.253652	0.305119	0.478841	-
srh-2|C05E4.14|C05E4.14b	-7.65209e-05	0.999928	0.999944	0.785934	0.501285	0.664273	-
nol-9|K09B11.2|K09B11.2a	3.14626e-05	0.99981	0.999889	-0.168452	0.325509	0.498921	-
epg-5|C56C10.12|C56C10.12	-0.000120042	0.999791	0.999889	-0.0838599	0.895045	0.940915	-
W09G3.1|W09G3.1|W09G3.1a	-9.05988e-05	0.999734	0.999889	0.424824	0.225023	0.38926	-
C08F11.7|C08F11.7|C08F11.7	0.000159358	0.99961	0.999806	1.16978	0.0222437	0.0739338	-
gnrr-5|H22D07.1|H22D07.1	0.000277868	0.999271	0.999505	-0.059291	0.888899	0.937035	-
Y38C1AA.14|Y38C1AA.14|Y38C1AA.14	-0.000275342	0.999236	0.999505	0.429479	0.245838	0.413431	-
T02H6.8|T02H6.8|T02H6.8	0.00140725	0.998982	0.999295	2.48172	0.170648	0.31941	-
bmk-1|F23B12.8|F23B12.8b	-0.000193988	0.998928	0.99928	-0.302468	0.108205	0.232126	-
C55F2.1|C55F2.1|C55F2.1a	0.00041451	0.998625	0.999016	-0.864467	0.00573761	0.0272616	-
F17E5.2|F17E5.2|F17E5.2	-0.000368756	0.998554	0.999016	-0.135188	0.619185	0.757265	-
M7.8|M7.8|M7.8	-0.00069109	0.998594	0.999016	0.305119	0.547715	0.702077	-
Y73E7A.3|Y73E7A.3|Y73E7A.3a	0.000641505	0.998375	0.998947	-0.549837	0.184674	0.337425	-
npp-8|Y41D4B.19|Y41D4B.19b	-0.000506348	0.998345	0.998947	-0.0805548	0.799093	0.879662	-
his-57|F54E12.5|F54E12.5	0.00055399	0.998439	0.998947	0.622005	0.0870371	0.199205	-
his-65|H02I12.7|H02I12.7	0.00055399	0.998439	0.998947	0.622005	0.0870371	0.199205	-
rpc-1|C42D4.8|C42D4.8	-0.00046862	0.998138	0.998802	-0.383655	0.140678	0.278798	-
gld-2|ZC308.1|ZC308.1d	-0.000871096	0.998081	0.998802	-0.311234	0.533407	0.690267	-
F53H4.6|F53H4.6|F53H4.6	0.00145594	0.998103	0.998802	-0.00768599	0.992813	0.995903	-
F47D12.9|F47D12.9|F47D12.9b	-0.000644941	0.997983	0.998766	-0.0904298	0.784167	0.870569	-
T15D6.12|T15D6.12|T15D6.12	-0.00540286	0.997779	0.9986	1.79704	0.490428	NA	-
K06A9.3|K06A9.3|K06A9.3	-0.00107525	0.997733	0.998593	0.268188	0.575994	0.724474	-
F19G12.1|F19G12.1|F19G12.1	0.00245038	0.997733	0.998593	0.368314	0.760558	0.85552	-
R13.3|R13.3|R13.3	0.000804557	0.997471	0.99841	0.0678141	0.83934	0.907315	-
F54F7.8|F54F7.8|F54F7.8	-0.00307058	0.997046	0.998036	-0.369783	0.753783	0.851877	-
spe-26|R10H10.2|R10H10.2	-0.000565496	0.997059	0.998036	0.395771	0.052066	0.137348	-
R08C7.2|R08C7.2|R08C7.2a	-0.000339098	0.996771	0.997826	-0.207477	0.0587828	0.149935	-
C25B8.7|C25B8.7|C25B8.7	0.00320835	0.996598	0.997722	-0.836812	0.433596	0.60482	-
Y71A12B.14|Y71A12B.14	-0.000656872	0.996628	0.997722	-0.35803	0.0856278	0.196843	-
C26B9.1|C26B9.1|C26B9.1a	0.000940666	0.996515	0.997687	0.373967	0.185272	0.338283	-
T19C3.3|T19C3.3|T19C3.3	0.00105568	0.996446	0.997657	-0.0703332	0.820678	0.894936	-
morc-1|ZC155.3|ZC155.3	-0.00149518	0.99629	0.99757	-0.584737	0.161908	0.307938	-
F26F2.3|F26F2.3|F26F2.3	-0.0051299	0.99632	0.99757	0.554722	0.72106	0.831091	-
T25D1.4|T25D1.4	0.00497914	0.996226	0.997554	1.30962	0.383228	0.557635	-
T27B1.3|T27B1.3	0.00497914	0.996226	0.997554	1.30962	0.383228	0.557635	-
C08B6.2|C08B6.2|C08B6.2a	0.003473	0.996021	0.997427	0.526686	0.592911	0.737509	-
ZK355.2|ZK355.2|ZK355.2b	-0.00166839	0.995849	0.997328	-0.152427	0.719829	0.83014	-
T05B11.9|T05B11.9	0.000906575	0.995884	0.997328	-0.0246766	0.913619	0.951673	-
nduf-7|W10D5.2|W10D5.2	-0.000791993	0.99587	0.997328	-0.0058319	0.976488	0.987987	-
Y51A2D.26|Y51A2D.26	0.00625303	0.995769	0.997328	0.96339	0.550248	0.703965	-
R01B10.3|R01B10.3|R01B10.3	0.000943685	0.99562	0.997221	0.0476644	0.831545	0.901631	-
W06E11.1|W06E11.1|W06E11.1	0.00172463	0.995421	0.997082	-0.782749	0.0477037	0.128847	-
fip-5|F41E7.4|F41E7.4	0.0017571	0.995442	0.997082	-0.12919	0.743908	0.845547	-
srp-6|C03G6.19|C03G6.19	0.00115249	0.995406	0.997082	0.0152951	0.953455	0.975938	-
sru-17|T04A11.10|T04A11.10	0.00970908	0.995441	0.997082	0.303994	0.890529	NA	-
pat-12|T17H7.4|T17H7.4i	0.00189381	0.995285	0.99708	-0.32613	0.438707	0.609479	-
eif-1.A|H06H21.3|H06H21.3	-0.000988005	0.995093	0.99698	-0.0872029	0.674239	0.797238	-
K08D8.7|K08D8.7|K08D8.7a	-0.00224241	0.995125	0.99698	0.541118	0.265527	0.435671	-
arrd-7|Y17G7B.11|Y17G7B.11	0.00167432	0.995146	0.99698	0.986859	0.00591987	0.0279024	-
H43I07.1|H43I07.1|H43I07.1	-0.000930394	0.994972	0.996923	-0.0271596	0.887963	0.93654	-
prx-1|C11H1.4|C11H1.4a	-0.00149551	0.994882	0.996911	-0.461996	0.1297	0.263035	-
F31B12.9|F31B12.9	-0.0107106	0.994849	0.996911	0.0563957	0.979406	NA	-
K06A4.6|K06A4.6|K06A4.6	-0.00198042	0.994921	0.996911	1.13935	0.0074331	0.0331436	-
W07G4.3|W07G4.3|W07G4.3	0.00167514	0.994698	0.996806	-0.0165543	0.959676	0.979479	-
T26E3.4|T26E3.4|T26E3.4	-0.00136187	0.99468	0.996806	0.174402	0.508164	0.669646	-
prdx-6|Y38C1AA.11|Y38C1AA.11	-0.000998556	0.994545	0.99673	-0.148551	0.430902	0.602251	-
T25B6.3|T25B6.3|T25B6.3	-0.00978789	0.994475	0.99673	1.19362	0.534502	0.691105	-
T01C3.12|T01C3.12	0.0104843	0.994523	0.99673	1.91916	0.393426	NA	-
B0261.5|B0261.5|B0261.5	0.00147803	0.994334	0.996636	0.648044	0.0212228	0.0714699	-
clec-82|Y54G2A.8|Y54G2A.8a	0.00508164	0.993715	0.9962	-0.547618	0.520538	0.680106	-
W01D2.5|W01D2.5|W01D2.5	-0.00104013	0.993788	0.9962	-0.222452	0.199205	0.357218	-
ZK355.2|ZK355.2|ZK355.2a	-0.00182829	0.99386	0.9962	-0.0971799	0.75479	0.852466	-
pro-2|C07E3.2|C07E3.2	0.00135455	0.993846	0.9962	0.0968007	0.669607	0.793521	-
pef-1|F23H11.8|F23H11.8c	0.00297548	0.993824	0.9962	0.137909	0.785753	0.871525	-
lgc-5|F17E9.7|F17E9.7	0.0112389	0.993779	0.9962	0.734573	0.695215	NA	-
dct-19|C32H11.13|C32H11.13	-0.0118177	0.993567	0.996168	-0.855422	0.713774	0.825797	-
T08D2.3|T08D2.3	-0.00100832	0.993536	0.996168	-0.346293	0.0330553	0.0983302	-
lec-8|R07B1.10|R07B1.10	0.00220268	0.993594	0.996168	0.700413	0.0479048	0.129332	-
F09F9.5|F09F9.5|F09F9.5	0.00644403	0.993506	0.996168	0.786415	0.494948	0.658919	-
dpy-10|T14B4.7|T14B4.7a	0.00313212	0.993405	0.996135	-1.33233	0.00822792	0.0358791	-
srh-147|K08G2.12|K08G2.12a	-0.0145361	0.993404	0.996135	-0.0906401	0.966648	NA	-
F36D1.7|F36D1.7|F36D1.7	0.00300233	0.993385	0.996135	0.513805	0.274423	0.445915	-
gnrr-4|C41G11.4|C41G11.4c	-0.00293663	0.993222	0.996069	-0.440872	0.364174	0.538943	-
F44F1.4|F44F1.4|F44F1.4	0.00336221	0.993182	0.996068	-0.266639	0.596536	0.740312	-
kin-10|T01G9.6|T01G9.6a	-0.000853833	0.993152	0.996068	-0.226283	0.0794511	0.186882	-
nhx-2|B0495.4|B0495.4	-0.00165756	0.993088	0.996052	-0.497126	0.0466899	0.126779	-
snf-3|T13B5.1|T13B5.1	-0.0025408	0.993003	0.996005	-0.186262	0.622998	0.760021	-
prdx-3|R07E5.2|R07E5.2	-0.00130362	0.992972	0.996005	-0.176506	0.355934	0.530474	-
C03C10.7|C03C10.7|C03C10.7	-0.00148543	0.992476	0.995555	0.00597165	0.976569	0.988003	-
H12D21.11|H12D21.11|H12D21.11	-0.0100265	0.99234	0.995457	3.34001	0.0255714	0.0814387	-
Y59A8B.8|Y59A8B.8|Y59A8B.8	0.00211643	0.992245	0.995402	0.195614	0.486809	0.651976	-
T04A8.6|T04A8.6|T04A8.6	0.00148144	0.992133	0.995328	-0.394677	0.0429754	0.119754	-
C06C3.5|C06C3.5	0.00391786	0.991891	0.995125	0.361528	0.482459	0.647989	-
gip-1|H04J21.3|H04J21.3c	-0.00256909	0.991823	0.995095	-0.033514	0.921434	0.956696	-
T10F2.4|T10F2.4|T10F2.4	0.00290829	0.991433	0.994743	-0.567222	0.105749	0.228255	-
gck-3|Y59A8B.23|Y59A8B.23b	-0.00243753	0.991406	0.994743	-0.566993	0.0559505	0.144808	-
F26A1.7|F26A1.7|F26A1.7	0.0178487	0.99143	0.994743	0.0784362	0.972068	NA	-
nhr-8|F33D4.1|F33D4.1a	0.0032675	0.991339	0.994743	0.120949	0.758888	0.85493	-
sma-9|T05A10.1|T05A10.1l	0.00256806	0.991212	0.994678	-0.109486	0.722203	0.831783	-
F40G9.14|F40G9.14|F40G9.14	0.0148332	0.990865	0.994369	1.77611	0.276598	0.448113	-
sdz-12|F12E12.5|F12E12.5	-0.0177023	0.990743	0.994285	-0.414396	0.8373	NA	-
K05G3.2|K05G3.2|K05G3.2	0.0175463	0.990547	0.994128	-0.0783076	0.968135	0.983937	-
K09A9.8|K09A9.8|K09A9.8	0.00324618	0.990525	0.994128	0.691842	0.0522107	0.137641	-
alh-12|Y69F12A.2|Y69F12A.2a	0.00211099	0.990416	0.9941	-0.486029	0.0326171	0.0972645	-
C52E12.4|C52E12.4|C52E12.4	-0.00217376	0.990441	0.9941	-0.284829	0.230476	0.395708	-
F18E9.7|F18E9.7|F18E9.7	0.0110206	0.990336	0.994072	-0.406058	0.706167	0.820257	-
clec-225|B0365.5|B0365.5b	0.00430729	0.99026	0.99405	-0.90245	0.0554237	0.143753	-
W01B6.3|W01B6.3|W01B6.3	0.0068546	0.990275	0.99405	0.0226754	0.977296	0.98849	-
Y105C5A.15|Y105C5A.15|Y105C5A.15a	-0.0041421	0.990031	0.993883	0.529639	0.220062	0.382869	-
pccb-1|F52E4.1|F52E4.1b	0.00201983	0.989892	0.993783	-0.522673	0.0115971	0.0462622	-
fbxa-1|Y54F10BM.10|Y54F10BM.10	-0.00691546	0.989849	0.993779	1.16038	0.107976	0.231735	-
math-27|F36H5.2|F36H5.2c	0.00306	0.989801	0.993769	0.0667993	0.829424	0.900145	-
B0302.2|B0302.2|B0302.2	-0.0277403	0.98974	0.993762	-2.88585	0.293074	NA	-
wdr-23|D2030.9|D2030.9b	-0.00396874	0.989618	0.993762	-0.397311	0.316286	0.490065	-
hmr-1|W02B9.1|W02B9.1a	-0.00430474	0.989592	0.993762	-0.308105	0.473033	0.639953	-
map-2|Y116A8A.9|Y116A8A.9	-0.00202306	0.989751	0.993762	-0.1913	0.347096	0.521419	-
C40H1.6|C40H1.6|C40H1.6	0.0017176	0.989512	0.993762	-0.181852	0.281896	0.453521	-
F11D11.4|F11D11.4|F11D11.4	-0.0167621	0.989665	0.993762	0.823497	0.69789	0.814397	-
srbc-72|F30B5.9	0.0145401	0.989755	0.993762	1.30755	0.345333	0.519631	-
Y50E8A.2|Y50E8A.2|Y50E8A.2	0.00398494	0.989681	0.993762	1.49032	0.000350239	0.00357313	-
srw-19|T10H4.8|T10H4.8	-0.0261523	0.989396	0.993747	-0.603288	0.805719	NA	-
cri-3|F59A2.3|F59A2.3	0.00197768	0.989379	0.993747	-0.271855	0.157002	0.301679	-
nhr-11|ZC410.1|ZC410.1a	-0.00495948	0.989429	0.993747	0.396	0.414906	0.587695	-
fbxa-74|Y22D7AR.9|Y22D7AR.9	-0.00421372	0.989344	0.993747	1.23956	0.00267374	0.0157143	-
pat-12|T17H7.4|T17H7.4l	0.0042767	0.989249	0.993723	-0.315943	0.44888	0.618047	-
atf-6|F45E6.2|F45E6.2	0.00319926	0.989217	0.993723	-0.183482	0.562908	0.713612	-
gcy-14|ZC412.2|ZC412.2	0.00946667	0.989194	0.993723	1.49566	0.135321	0.271162	-
F28B1.10|F28B1.10	-0.0211274	0.989023	0.993613	0.108559	0.954364	NA	-
nape-2|Y37E11AR.3|Y37E11AR.3c	0.00383964	0.988947	0.993576	0.708665	0.0477353	0.128918	-
mvk-1|Y42G9A.4|Y42G9A.4b	-0.00241306	0.98883	0.993497	-0.301893	0.179753	0.330823	-
sago-2|F56A6.1|F56A6.1a	0.00178643	0.988683	0.993389	-0.381027	0.0204979	0.0697566	-
vps-41|F32A6.3|F32A6.3b	0.00249726	0.988593	0.993338	-0.260596	0.252659	0.421382	-
ZK265.9|ZK265.9|ZK265.9	-0.00207864	0.988403	0.993241	-0.441732	0.0174179	0.062023	-
bli-4|K04F10.4|K04F10.4e	-0.00344195	0.988432	0.993241	-0.38169	0.218182	0.380241	-
M03F8.6|M03F8.6|M03F8.6	-0.00510613	0.988402	0.993241	0.0277182	0.952942	0.97574	-
T28A11.2|T28A11.2|T28A11.2b	0.00352926	0.988458	0.993241	0.437342	0.164381	0.311171	-
nape-2|Y37E11AR.3|Y37E11AR.3a	-0.00406286	0.988279	0.993217	0.699128	0.0503247	0.13397	-
T05H10.8|T05H10.8|T05H10.8	-0.00492078	0.988239	0.993217	-0.0500029	0.912922	0.951409	-
F42F12.14|F42F12.14|F42F12.14	0.0238706	0.987887	0.992902	5.11831	0.00677106	0.030928	N2
Y73B3A.4|Y73B3A.4|Y73B3A.4	0.00483904	0.987803	0.992856	-0.588253	0.162896	0.309098	-
F54B8.17|F54B8.17	0.00681465	0.987662	0.992753	0.082189	0.890149	0.937738	-
R10E9.3|R10E9.3|R10E9.3a	0.00503429	0.987612	0.992743	0.862958	0.0395746	0.11241	-
Y71G10AR.1|Y71G10AR.1|Y71G10AR.1	-0.00630132	0.987557	0.992726	-0.896567	0.0998382	0.21926	-
Y53F4B.18|Y53F4B.18|Y53F4B.18	0.00412631	0.987437	0.992682	-1.03217	0.00438712	0.0224831	-
gap-2|ZK899.8|ZK899.8d	-0.00463941	0.987422	0.992682	-0.659875	0.0881337	0.201001	-
R09D1.9|R09D1.9	0.00764667	0.987474	0.992682	-0.315716	0.615603	0.754903	-
efl-2|Y48C3A.17|Y48C3A.17d	0.00370696	0.987468	0.992682	-0.134828	0.662699	0.788238	-
C17H12.3|C17H12.3|C17H12.3	0.00364678	0.987441	0.992682	0.471501	0.116084	0.243913	-
R11A8.7|R11A8.7|R11A8.7b	0.00229554	0.987274	0.992676	-0.320124	0.0887106	0.201894	-
srh-49|C10G11.4|C10G11.4	0.017439	0.98724	0.992676	2.542	0.100199	0.219853	-
F41E6.9|F41E6.9|F41E6.9	-0.00185783	0.987091	0.99257	-0.161174	0.278052	0.449607	-
Y116F11B.10|Y116F11B.10	0.0031985	0.987041	0.992559	0.300245	0.25791	0.427955	-
C34E10.10|C34E10.10|C34E10.10	0.00298329	0.986959	0.992515	0.0705004	0.764614	0.857814	-
H12D21.16|H12D21.16	-0.0300076	0.986698	0.992292	1.02863	0.66274	0.788238	-
C02H6.1|C02H6.1|C02H6.1	0.0184921	0.986632	0.992265	0.525502	0.697377	0.814043	-
F44G4.5|F44G4.5|F44G4.5	-0.00441178	0.986144	0.991813	0.797719	0.0154249	0.0569189	-
atg-9|T22H9.2|T22H9.2a	0.00489789	0.986053	0.991798	-0.130847	0.727818	0.835348	-
inx-13|Y8G1A.2|Y8G1A.2	-0.00225872	0.986056	0.991798	-0.108342	0.522412	0.681731	-
nhr-52|K06B4.2|K06B4.2	0.0171489	0.986091	0.991798	0.572337	0.665306	0.790245	-
W01C9.4|W01C9.4|W01C9.4	-0.00309737	0.985926	0.99175	0.416499	0.0695657	0.169817	-
dcp-66|C26C6.5|C26C6.5a	-0.00510178	0.985855	0.991718	0.0311614	0.93546	0.965123	-
alh-12|Y69F12A.2|Y69F12A.2b	0.00308068	0.985745	0.991646	-0.513961	0.0217351	0.0726764	-
D2007.1|D2007.1|D2007.1	0.00376598	0.985729	0.991646	0.518844	0.0607776	0.153622	-
gst-10|Y45G12C.2|Y45G12C.2	-0.00472353	0.98558	0.991558	-0.148848	0.659785	0.786363	-
C03H5.3|C03H5.3|C03H5.3	-0.00353998	0.985383	0.991399	0.0263411	0.915869	0.953006	-
F11E6.1|F11E6.1|F11E6.1a	-0.0043287	0.985212	0.991266	-0.590836	0.054191	0.141418	-
tag-329|C50F4.3|C50F4.3	-0.0099604	0.985173	0.991266	0.450577	0.494158	0.658296	-
C14C10.5|C14C10.5|C14C10.5	0.00456546	0.985075	0.991244	-0.314678	0.319708	0.493048	-
stn-1|F30A10.8|F30A10.8a	-0.00290577	0.985113	0.991244	0.385168	0.0586078	0.149602	-
sre-21|C47A10.4|C47A10.4	0.0300261	0.984985	0.991194	3.09308	0.139233	0.276609	-
tag-263|C11E4.3|C11E4.3	-0.0136562	0.98472	0.990966	0.782332	0.439783	0.610238	-
Y45F10B.17|Y45F10B.17	-0.0356462	0.984628	0.990912	-0.145575	0.952237	NA	-
rpb-12|F23B2.13|F23B2.13	-0.00422022	0.984529	0.990852	0.0493864	0.859961	0.919919	-
C25D7.1|C25D7.1|C25D7.1	-0.0035729	0.984444	0.990805	0.252651	0.288751	0.460801	-
T28B8.6|T28B8.6|T28B8.6	-0.00588067	0.984266	0.990665	0.811694	0.0360889	0.105014	-
pqn-21|C37A2.5|C37A2.5a	0.00581927	0.984116	0.990553	-0.0864023	0.825319	0.897697	-
Y38E10A.24|Y38E10A.24|Y38E10A.24	-0.0043852	0.984111	0.990553	0.181634	0.522477	0.681732	-
srh-308|F58E10.6|F58E10.6	-0.0273869	0.984043	0.990553	1.75708	0.343075	NA	-
T13C5.7|T13C5.7|T13C5.7	-0.0130498	0.983942	0.990496	0.693216	0.516966	0.677118	-
sma-9|T05A10.1|T05A10.1d	-0.00473977	0.983795	0.990405	-0.119297	0.698741	0.81486	-
T06E6.1|T06E6.1|T06E6.1	-0.0038382	0.983814	0.990405	0.22913	0.348682	0.523065	-
lmn-1|DY3.2|DY3.2	0.00509531	0.983507	0.990223	-0.405767	0.20312	0.361858	-
srt-25|C16D9.7|C16D9.7	0.0301791	0.983531	0.990223	0.381625	0.850994	NA	-
otpl-2|D1065.1|D1065.1	-0.0136094	0.983555	0.990223	0.48774	0.568225	0.718539	-
Y67D8C.6|Y67D8C.6|Y67D8C.6	0.0111507	0.983417	0.990201	0.935715	0.190133	0.34529	-
C27A7.1|C27A7.1|C27A7.1a	0.00393428	0.983251	0.990073	-0.0677624	0.782577	0.8694	-
nrd-1|D1007.7|D1007.7	-0.00470076	0.983181	0.990041	-0.535844	0.0644888	0.160441	-
F02A9.4|F02A9.4|F02A9.4b	0.00296404	0.983018	0.989926	-0.4168	0.0213865	0.0718339	-
F14F9.5|F14F9.5|F14F9.5	-0.00442845	0.983027	0.989926	-0.181005	0.514687	0.67523	-
Y82E9BR.14|Y82E9BR.14|Y82E9BR.14b	0.00215186	0.982918	0.989894	-0.260497	0.048725	0.130899	-
mab-3|Y53C12B.5|Y53C12B.5b	-0.00831519	0.982807	0.989883	0.181027	0.710983	0.823772	-
C29F4.t1|C29F4.t1	0.0346384	0.982869	0.989883	2.95759	0.162997	NA	-
F14B4.4|F14B4.4	0.0346384	0.982869	0.989883	2.95759	0.162997	NA	-
F14B4.t2|F14B4.t2	0.0346384	0.982869	0.989883	2.95759	0.162997	NA	-
F33D11.t1|F33D11.t1	0.0346384	0.982869	0.989883	2.95759	0.162997	NA	-
cyp-34A1|T10H4.10|T10H4.10	-0.0323016	0.982615	0.989865	-0.941364	0.602668	0.744736	-
abcf-1|F18E2.2|F18E2.2	0.00431576	0.98263	0.989865	-0.0596078	0.815914	0.891658	-
K04D7.6|K04D7.6|K04D7.6	0.00966827	0.982656	0.989865	0.620172	0.27454	0.446045	-
M02G9.4|M02G9.4|M02G9.4a	0.00517519	0.982485	0.989809	0.574787	0.0609636	0.153981	-
T04C12.1|T04C12.1|T04C12.1	0.0302393	0.982424	0.989787	-0.386154	0.853919	0.916773	-
C27A7.5|C27A7.5|C27A7.5a	-0.00295809	0.982145	0.989544	0.051238	0.766535	0.859336	-
unc-52|ZC101.2|ZC101.2b	0.00753218	0.982092	0.989532	-0.597508	0.183306	0.335551	-
clec-90|F57C9.2|F57C9.2	-0.0127597	0.982073	0.989532	-0.0763119	0.924218	0.958051	-
F29D10.1|F29D10.1|F29D10.1	-0.00838466	0.982094	0.989532	1.29828	0.00766834	0.0339335	-
abts-1|F52B5.1|F52B5.1c	-0.00700698	0.981769	0.989322	-0.662989	0.0991902	0.218289	-
srh-210|D1065.4|D1065.4b	0.0227431	0.981446	0.989166	-0.488111	0.703101	0.818042	-
itr-1|F33D4.2|F33D4.2f	-0.00492567	0.981346	0.989166	-0.385594	0.162811	0.309007	-
srbc-60|R09E12.8|R09E12.8	0.0284876	0.981565	0.989166	-0.279106	0.872008	NA	-
klp-7|K11D9.1|K11D9.1a	0.00337499	0.981413	0.989166	-0.109279	0.560907	0.711848	-
tag-313|Y66H1A.3|Y66H1A.3	0.0056201	0.981576	0.989166	0.304461	0.33139	0.504936	-
F17E9.4|F17E9.4|F17E9.4	0.00549732	0.981414	0.989166	0.351793	0.249135	0.417004	-
F35E12.8|F35E12.8|F35E12.8a	-0.00755227	0.98153	0.989166	0.693947	0.100579	0.220391	-
C05E7.3|C05E7.3|C05E7.3	-0.00962186	0.981574	0.989166	0.964387	0.0709589	0.172361	-
Y54F10AM.5|Y54F10AM.5|Y54F10AM.5	0.00302878	0.981237	0.989137	-0.247527	0.137298	0.274003	-
rab-11.2|W04G5.2|W04G5.2a	0.0133599	0.981051	0.988989	0.67512	0.398724	0.5723	-
T19D12.9|T19D12.9|T19D12.9	-0.00670592	0.980953	0.988928	0.138148	0.712033	0.82456	-
ppw-1|C18E3.7|C18E3.7d	-0.003557	0.980867	0.988881	-0.431601	0.0247164	0.0797747	-
K10C2.6|K10C2.6|K10C2.6	-0.0178808	0.980715	0.988766	0.922744	0.32495	0.498333	-
oac-36|F56H6.12|F56H6.12	-0.0353178	0.980688	0.988766	1.23358	0.504974	0.667374	-
C27A7.5|C27A7.5|C27A7.5e	-0.00297692	0.980495	0.98863	-0.0735355	0.646136	0.775844	-
F48B9.3|F48B9.3|F48B9.3	0.0146827	0.98049	0.98863	0.163977	0.849961	0.913924	-
nhr-150|C06B8.1|C06B8.1	-0.0135905	0.980502	0.98863	1.18164	0.10114	0.221266	-
Y6G8.9|Y6G8.9|Y6G8.9	0.0188299	0.980298	0.988562	-0.66275	0.575199	0.723956	-
T02B11.3|T02B11.3|T02B11.3a	0.00326694	0.980241	0.988562	0.0918142	0.591094	0.736182	-
T23G7.3|T23G7.3|T23G7.3	0.00485184	0.980319	0.988562	0.173306	0.495045	0.659006	-
Y60A9A.1|Y60A9A.1|Y60A9A.1	0.0266994	0.980112	0.988471	-1.80961	0.215387	0.376924	-
C26E1.1|C26E1.1|C26E1.1	0.0369651	0.97992	0.988316	0.172515	0.914963	0.952541	-
kin-10|T01G9.6|T01G9.6b	0.00247443	0.97988	0.988315	-0.225661	0.0758017	0.180829	-
pat-12|T17H7.4|T17H7.4h	0.00813347	0.979832	0.988305	-0.320157	0.448868	0.618047	-
rpn-6.2|F59B2.5|F59B2.5a	-0.00262174	0.979767	0.988279	-0.0578728	0.673612	0.796829	-
dpm-1|Y66H1A.2|Y66H1A.2	0.00557861	0.97972	0.98827	-0.0243805	0.931379	0.962621	-
gpa-13|F18E2.5|F18E2.5	0.0150999	0.97956	0.988149	-0.159592	0.848162	0.91279	-
mltn-7|Y39D8B.1|Y39D8B.1	-0.0400849	0.979488	0.988115	-0.688143	0.73888	NA	-
D1086.7|D1086.7|D1086.7	0.0035858	0.979435	0.9881	-0.00815164	0.964095	0.98162	-
nhr-282|F54B8.2|F54B8.2	0.0467511	0.979426	0.9881	0.135827	0.953902	NA	-
E04D5.1|E04D5.1|E04D5.1b	0.00448801	0.979276	0.988084	-0.46373	0.0383871	0.109849	-
ppw-1|C18E3.7|C18E3.7c	-0.00381075	0.979341	0.988084	-0.430629	0.0241751	0.0784719	-
ZC239.21|ZC239.21|ZC239.21	0.0345778	0.979336	0.988084	-0.401638	0.757302	0.853927	-
srh-283|C47A10.2|C47A10.2	-0.0206566	0.979319	0.988084	2.45661	0.0475046	0.128422	-
T27E4.7|T27E4.7|T27E4.7	-0.00669471	0.979076	0.987972	0.00560174	0.986529	0.993006	-
F44G3.2|F44G3.2|F44G3.2	-0.00855933	0.979067	0.987972	0.322898	0.442479	0.612707	-
lgc-25|R03E1.3|R03E1.3	-0.00850592	0.978989	0.987963	0.106788	0.804421	0.883501	-
F36D4.5|F36D4.5|F36D4.5a	0.0115431	0.978947	0.987959	-0.147649	0.797885	0.878884	-
ZK154.4|ZK154.4|ZK154.4	0.00442627	0.978849	0.987899	0.0405462	0.853229	0.916313	-
itr-1|F33D4.2|F33D4.2a	-0.00553696	0.978636	0.987724	-0.374979	0.166865	0.314445	-
Y20C6A.1|Y20C6A.1|Y20C6A.1b	-0.00935687	0.978515	0.98764	-0.87848	0.0670161	0.165083	-
Y71A12B.19|Y71A12B.19	-0.0101192	0.978509	0.98764	0.336662	0.487906	0.652875	-
tag-163|M01E11.7|M01E11.7d	-0.00842472	0.978418	0.98762	-0.575922	0.167517	0.315176	-
fipr-21|F41E7.5|F41E7.5	-0.00526545	0.978402	0.98762	0.201088	0.42282	0.595091	-
D1022.5|D1022.5|D1022.5	-0.0240294	0.978287	0.987566	1.29934	0.388519	0.562897	-
sru-28|C38C3.1|C38C3.1	-0.0346052	0.978237	0.987554	-0.0620158	0.964436	0.981764	-
fkb-1|F36H1.1|F36H1.1	0.00529571	0.978129	0.987485	0.024213	0.922655	0.957248	-
F10G7.9|F10G7.9|F10G7.9a	0.00601258	0.97806	0.987454	-0.560855	0.0497693	0.132862	-
Y32H12A.9|Y32H12A.9|Y32H12A.9	0.0133021	0.97777	0.9872	-0.429639	0.500989	0.664114	-
tag-310|R10E4.2|R10E4.2j	-0.0155752	0.977737	0.9872	-0.113142	0.888649	0.937035	-
Y51A2D.14|Y51A2D.14|Y51A2D.14	-0.00524416	0.977723	0.9872	0.305413	0.208341	0.368271	-
daf-12|F11A1.3|F11A1.3c	-0.0175165	0.977741	0.9872	0.377199	0.672933	0.79627	-
M04C3.4|M04C3.4	-0.0117352	0.977572	0.987189	0.56069	0.302846	0.476234	-
T08G5.13|T08G5.13	-0.0115899	0.977604	0.987189	0.784199	0.174797	0.3246	-
srh-130|F14F9.1|F14F9.1	0.0307314	0.977536	0.987189	0.977613	0.562974	0.713659	-
ppw-2|Y110A7A.18|Y110A7A.18	-0.00482885	0.977256	0.986961	-0.222866	0.310861	0.484952	-
his-47|B0035.7|B0035.7	-0.00776909	0.977215	0.986961	0.65992	0.058895	0.150088	-
F35E12.8|F35E12.8|F35E12.8b	0.00922051	0.977263	0.986961	0.72686	0.0827613	0.192144	-
srx-51|T10H4.9|T10H4.9	-0.0264107	0.977136	0.98695	-0.634994	0.596156	0.74008	-
T24D5.1|T24D5.1|T24D5.1	-0.0533423	0.977045	0.986897	0.878444	0.715901	NA	-
spp-10|C28C12.7|C28C12.7b	0.0030379	0.976915	0.986805	-0.248125	0.0690044	0.168799	-
D1079.1|D1079.1|D1079.1	0.0269011	0.976824	0.986752	0.73135	0.553063	0.70602	-
F07E5.4|F07E5.4|F07E5.4	0.0159184	0.976655	0.986621	0.654261	0.341952	0.516112	-
Y59E9AL.36|Y59E9AL.36|Y59E9AL.36	-0.00724589	0.976601	0.986605	-0.0242154	0.939588	0.967653	-
nhr-227|T27B7.5|T27B7.5b	0.0136355	0.976472	0.986514	1.0455	0.092786	0.208378	-
Y102E9.6|Y102E9.6|Y102E9.6	-0.0241603	0.976389	0.986469	0.731764	0.515285	0.675743	-
B0563.6|B0563.6|B0563.6c	0.011061	0.975876	0.98601	-0.212325	0.671503	0.795076	-
pry-1|C37A5.9|C37A5.9	-0.00753524	0.975842	0.98601	-0.0672988	0.840162	0.907964	-
C14A4.14|C14A4.14|C14A4.14	0.00796862	0.975896	0.98601	0.314323	0.355771	0.530363	-
ugt-51|C03A7.11|C03A7.11	0.0130042	0.975768	0.985998	-0.872795	0.119899	0.248806	-
pph-4.1|Y75B8A.30|Y75B8A.30	0.00638133	0.975656	0.985998	-0.304543	0.262624	0.432936	-
T08B2.5|T08B2.5|T08B2.5d	-0.0127121	0.975757	0.985998	-0.0708326	0.898983	0.943115	-
hap-1|ZC395.7|ZC395.7	-0.0053046	0.9756	0.985998	-0.0673568	0.763344	0.857375	-
T06F4.1|T06F4.1|T06F4.1b	0.01313	0.975639	0.985998	0.298418	0.619467	0.757476	-
srg-2|C18F10.5|C18F10.5	0.0387766	0.975741	0.985998	3.09685	0.0631833	0.157977	-
R08E3.3|R08E3.3|R08E3.3b	-0.00439316	0.975423	0.985883	-0.38017	0.0418554	0.117299	-
ZK1290.1|ZK1290.1|ZK1290.1	0.0271307	0.975379	0.985878	-0.043415	0.966238	0.98276	-
F02H6.6|F02H6.6|F02H6.6	0.0336024	0.975283	0.985819	1.17592	0.362954	0.537637	-
gap-2|ZK899.8|ZK899.8b	-0.00902684	0.975169	0.985798	-0.671694	0.0783233	0.185102	-
T08A11.2|T08A11.2|T08A11.2	0.00941297	0.975224	0.985798	-0.668059	0.0890496	0.20247	-
aak-2|T01C8.1|T01C8.1a	-0.00529255	0.97522	0.985798	-0.248849	0.268025	0.438516	-
T20F7.3|T20F7.3|T20F7.3	0.0191066	0.975136	0.985798	-0.0597761	0.941733	0.968876	-
gck-3|Y59A8B.23|Y59A8B.23a	-0.00700975	0.974968	0.985732	-0.577195	0.0471903	0.127826	-
ZC168.6|ZC168.6|ZC168.6	0.00846534	0.97496	0.985732	0.660059	0.0576815	0.148008	-
C54G6.3|C54G6.3|C54G6.3	-0.0480883	0.975004	0.985732	0.785061	0.698485	NA	-
srg-30|W02F12.7|W02F12.7	-0.0282048	0.974632	0.985473	0.93887	0.393536	0.567538	-
W10G11.17|W10G11.17|W10G11.17	-0.01342	0.974554	0.985434	-0.5114	0.385375	0.55983	-
W04B5.6|W04B5.6|W04B5.6	0.0340481	0.97453	0.985434	1.13196	0.459252	0.627538	-
Y71H2B.4|Y71H2B.4|Y71H2B.4	0.00668822	0.974301	0.985261	0.31708	0.236275	0.402341	-
T01G6.1|T01G6.1|T01G6.1	-0.0243754	0.974306	0.985261	1.17679	0.291042	0.463179	-
T26A5.2|T26A5.2|T26A5.2b	-0.00963525	0.97409	0.985131	-0.424787	0.274147	0.445644	-
Y116A8C.9|Y116A8C.9|Y116A8C.9	0.00684823	0.974101	0.985131	-0.025094	0.928202	0.960866	-
E02H1.6|E02H1.6|E02H1.6	0.0045687	0.974003	0.98511	-0.261099	0.150288	0.292412	-
sma-9|T05A10.1|T05A10.1a	-0.00760894	0.974	0.98511	-0.118197	0.701488	0.817061	-
csk-1|Y48G1C.2|Y48G1C.2	0.00764155	0.973818	0.985001	-0.12611	0.677186	0.799333	-
ZK863.12|ZK863.12	-0.0575893	0.97356	0.98481	-0.774876	0.735544	NA	-
C27A7.5|C27A7.5|C27A7.5c	-0.00402618	0.973536	0.98481	-0.0752219	0.637515	0.770033	-
ceh-28|K03A11.3|K03A11.3	-0.0494915	0.97359	0.98481	1.05144	0.553273	NA	-
str-125|T05E12.1|T05E12.1	-0.0401616	0.973422	0.984757	2.60456	0.121654	0.251255	-
F38B6.8|F38B6.8|F38B6.8	0.0813332	0.973204	0.984575	-1.35726	0.668383	NA	-
egrh-2|Y55F3AM.7|Y55F3AM.7	0.009985	0.973088	0.984496	-0.433863	0.276248	0.447723	-
M02F4.1|M02F4.1|M02F4.1	0.0173018	0.97274	0.984183	0.584277	0.407262	0.580353	-
C52E4.12|C52E4.12|C52E4.12	0.014665	0.972479	0.983959	0.877593	0.0980512	0.216652	-
hum-8|Y66H1A.6|Y66H1A.6a	-0.00737025	0.972426	0.983943	-0.0935946	0.735431	0.83992	-
col-86|Y81G3A.5|Y81G3A.5a	0.0232094	0.972294	0.98385	-0.599695	0.479325	0.64491	-
C33A11.2|C33A11.2|C33A11.2	-0.00967122	0.972194	0.983787	-0.14095	0.697842	0.814393	-
gap-2|ZK899.8|ZK899.8c	0.0104798	0.972096	0.983726	-0.654848	0.0962495	0.213769	-
srh-188|ZK105.7	0.0437946	0.972066	0.983726	1.17641	0.509939	0.671227	-
F32H2.7|F32H2.7|F32H2.7	-0.00531718	0.971949	0.983656	0.143245	0.466296	0.633902	-
Y80D3A.11|Y80D3A.11	0.00740693	0.97187	0.983615	0.604788	0.027113	0.0850048	-
F17C11.12|F17C11.12|F17C11.12b	0.00573282	0.971784	0.983613	-0.17827	0.400619	0.574353	-
W02H5.9|W02H5.9|W02H5.9	0.0139866	0.971813	0.983613	-0.142968	0.78879	0.873441	-
F33D4.12|F33D4.12	0.0315501	0.97183	0.983613	0.091151	0.94039	0.968146	-
H34C03.2|H34C03.2|H34C03.2	0.0118251	0.971626	0.983524	-0.397138	0.375728	0.550801	-
unc-60|C38C3.5|C38C3.5a	-0.0041402	0.971382	0.983316	-0.246341	0.0997313	0.219121	-
R53.5|R53.5|R53.5	-0.00882142	0.971139	0.983125	0.318426	0.311098	0.485198	-
K08D8.7|K08D8.7	-0.0147373	0.971155	0.983125	0.573676	0.289256	0.461248	-
M7.7|M7.7|M7.7	-0.00599005	0.970781	0.982824	0.667225	0.00202587	0.0127897	-
F02E9.9|F02E9.9|F02E9.9a	0.00378492	0.970718	0.9828	-0.34578	0.00967967	0.0404758	-
F52C12.6|F52C12.6|F52C12.6	0.00880486	0.970684	0.9828	0.295045	0.339261	0.51339	-
K09A11.5|K09A11.5|K09A11.5	0.0316324	0.970492	0.982649	-1.04569	0.380395	0.555622	-
clec-124|C17F4.1|C17F4.1	0.0497054	0.97032	0.982513	-1.47056	0.288252	0.460337	-
C09G9.5|C09G9.5|C09G9.5a	-0.0109059	0.970284	0.982513	0.600864	0.118173	0.246987	-
sago-2|F56A6.1|F56A6.1b	0.0050402	0.970233	0.982507	-0.402052	0.022662	0.0750089	-
W08F4.7|W08F4.7|W08F4.7	-0.0160356	0.970237	0.982507	0.680502	0.214385	0.375727	-
C09G12.17|C09G12.17|C09G12.17	0.0680794	0.970021	0.982366	-0.825693	0.747587	NA	-
M106.2|M106.2|M106.2	0.0155384	0.969846	0.982271	-0.416729	0.446139	0.615754	-
F20B6.6|F20B6.6|F20B6.6	-0.014854	0.969889	0.982271	0.0601943	0.9149	0.952541	-
Y54E2A.10|Y54E2A.10|Y54E2A.10	0.0123845	0.969865	0.982271	1.07962	0.0114054	0.0457203	-
hum-2|F36D4.3|F36D4.3a	-0.0114702	0.969712	0.982209	-0.333409	0.395532	0.569259	-
dct-1|C14F5.1|C14F5.1b	0.0141242	0.969707	0.982209	0.197925	0.682731	0.803407	-
glb-4|C09H10.8|C09H10.8	-0.0141875	0.969567	0.982186	0.476289	0.356919	0.53149	-
clec-6|C35D10.15|C35D10.15	0.0181296	0.969612	0.982186	0.659507	0.309983	0.483983	-
nhr-159|C17E7.7|C17E7.7	0.0459849	0.969587	0.982186	1.52587	0.281595	0.453246	-
uda-1|K08H10.4|K08H10.4	-0.0095359	0.96942	0.98213	-0.664021	0.0392578	0.111717	-
C31C9.7|C31C9.7|C31C9.7	-0.00794373	0.969441	0.98213	-0.0220097	0.935655	0.965176	-
srx-60|R13D7.4|R13D7.4	-0.070177	0.969351	0.982116	2.52598	0.305125	NA	-
Y71G12A.2|Y71G12A.2|Y71G12A.2b	0.0106874	0.969287	0.982091	-0.0173789	0.962461	0.980884	-
nape-2|Y37E11AR.3|Y37E11AR.3b	-0.0107167	0.969269	0.982091	0.719308	0.0452771	0.124054	-
C50A2.3|C50A2.3|C50A2.3	0.0123664	0.968792	0.981693	0.286442	0.48765	0.652753	-
glr-3|K10D3.1|K10D3.1	-0.0254533	0.968818	0.981693	1.1214	0.202096	0.360662	-
Y71H2AM.13|Y71H2AM.13|Y71H2AM.13	0.0106999	0.968608	0.981558	-0.210562	0.551042	0.70465	-
ZC477.2|ZC477.2|ZC477.2	-0.010939	0.968589	0.981558	0.450351	0.22288	0.386262	-
F36H12.4|F36H12.4|F36H12.4	-0.01067	0.968598	0.981558	0.719	0.0400538	0.113443	-
fbxa-216|Y47H9C.10|Y47H9C.10	-0.00858999	0.968426	0.98152	0.153902	0.590513	0.735757	-
F57F4.1|F57F4.1|F57F4.1	0.00580422	0.968456	0.98152	0.372714	0.0554825	0.143809	-
Y94H6A.8|Y94H6A.8|Y94H6A.8	0.00840096	0.968133	0.981272	0.206383	0.446943	0.616315	-
F56F11.1|F56F11.1|F56F11.1	-0.0197597	0.968018	0.981193	0.786211	0.202453	0.360932	-
C14B9.10|C14B9.10|C14B9.10	-0.0065067	0.967958	0.981172	-0.0405045	0.846429	0.911799	-
Y49A3A.6|Y49A3A.6	0.0149229	0.967721	0.981145	-1.07442	0.0382923	0.109696	-
T04F3.5|T04F3.5|T04F3.5	0.0265337	0.967839	0.981145	-0.633158	0.476513	0.642888	-
ccr-4|ZC518.3|ZC518.3c	0.0113751	0.967883	0.981145	-0.511472	0.176907	0.327107	-
dcaf-1|ZK1251.9|ZK1251.9	-0.00775645	0.967893	0.981145	-0.149896	0.548024	0.702292	-
C02G6.1|C02G6.1|C02G6.1	-0.010106	0.967854	0.981145	-0.147363	0.669095	0.793106	-
unc-34|Y50D4C.1|Y50D4C.1b	0.0158276	0.967789	0.981145	0.0986787	0.85613	0.917637	-
srv-28|T13A10.14|T13A10.14	0.0259568	0.967781	0.981145	1.10577	0.186588	0.340247	-
cyp-35A5|K07C6.5|K07C6.5	-0.0244692	0.967553	0.981082	-1.88209	0.0162221	0.0589684	-
F38B2.3|F38B2.3|F38B2.3	-0.0278145	0.967562	0.981082	-1.19572	0.187724	0.341902	-
T12A2.2|T12A2.2|T12A2.2	0.00608634	0.967414	0.981082	-0.618732	0.00133665	0.00950727	-
aha-1|C25A1.11|C25A1.11a	0.00656088	0.967226	0.981082	-0.596533	0.00494051	0.0245513	-
bath-28|F14D2.13|F14D2.13a	0.00713095	0.967347	0.981082	-0.192411	0.397129	0.570955	-
wah-1|Y56A3A.32|Y56A3A.32	0.00610104	0.967453	0.981082	-0.109977	0.570804	0.720495	-
F54D7.6|F54D7.6	0.00737565	0.967272	0.981082	0.129254	0.577313	0.725241	-
Y41E3.21|Y41E3.21	0.0184854	0.967344	0.981082	0.330566	0.583687	0.730293	-
Y65B4A.8|Y65B4A.8|Y65B4A.8	0.0128527	0.967268	0.981082	0.41602	0.303356	0.476838	-
Y46G5A.20|Y46G5A.20|Y46G5A.20	-0.0189928	0.967437	0.981082	1.91446	0.00172619	0.0114332	-
T24C4.4|T24C4.4|T24C4.4	0.0267559	0.967498	0.981082	3.71351	2.01476e-05	0.00045181	N2
ges-1|R12A1.4|R12A1.4	-0.0126781	0.967062	0.981004	-0.981036	0.0139696	0.0530109	-
F26F2.9|F26F2.9|F26F2.9	0.057622	0.96679	0.980767	1.93078	0.358192	0.532836	-
C30F2.5|C30F2.5|C30F2.5	-0.0140409	0.966751	0.980766	-0.190646	0.676134	0.798556	-
F41D3.12|F41D3.12	-0.0355523	0.96657	0.980621	3.01341	0.0172875	0.0616536	-
Y41C4A.12|Y41C4A.12|Y41C4A.12b	0.0105978	0.966492	0.980581	0.4178	0.201982	0.360595	-
tbc-3|F32B6.8|F32B6.8b	-0.0100233	0.966293	0.980537	-0.416202	0.179766	0.330823	-
H10D12.2|H10D12.2|H10D12.2	0.0227391	0.966409	0.980537	0.150684	0.850439	0.91423	-
lars-2|ZK524.3|ZK524.3a	-0.0123243	0.966298	0.980537	0.182213	0.628257	0.763933	-
F57A10.2|F57A10.2|F57A10.2	0.0320389	0.966328	0.980537	0.617314	0.550422	0.704114	-
R10E9.3|R10E9.3|R10E9.3b	-0.0132651	0.966411	0.980537	0.876961	0.0314771	0.0947055	-
C27A7.2|C27A7.2|C27A7.2	-0.0471292	0.966406	0.980537	2.41592	0.1403	0.278229	-
math-41|T08E11.4|T08E11.4	-0.00945774	0.966162	0.980519	0.116156	0.687589	0.806803	-
Y105C5B.8|Y105C5B.8|Y105C5B.8	-0.0239622	0.96608	0.980474	1.47367	0.0549178	0.142834	-
F01G4.4|F01G4.4|F01G4.4	-0.0095708	0.965995	0.980471	-0.407739	0.161395	0.307225	-
srw-68|F18E3.4|F18E3.4a	0.0569493	0.966038	0.980471	0.568049	0.734555	0.839464	-
ZK822.6|ZK822.6|ZK822.6	0.0155072	0.96603	0.980471	0.804101	0.0875534	0.200051	-
pqn-24|D1007.14|D1007.14	-0.00611652	0.965893	0.98044	0.0744871	0.690245	0.808874	-
sru-46|C45H4.5	-0.0592863	0.965837	0.980423	-1.53696	0.38275	NA	-
ZK1225.4|ZK1225.4|ZK1225.4	0.00815357	0.965771	0.980412	0.509621	0.0448936	0.123267	-
mps-1|C29F5.4|C29F5.4a	-0.0164347	0.965789	0.980412	0.617228	0.261293	0.431385	-
srp-5|C03G6.18|C03G6.18	-0.0115905	0.965681	0.980381	-0.0652174	0.854044	0.916858	-
fbxa-98|C08F11.5|C08F11.5	0.0175055	0.965595	0.980333	1.25988	0.0156019	0.0573596	-
F48G7.2|F48G7.2|F48G7.2a	0.0207169	0.965532	0.980308	0.700034	0.269381	0.439965	-
vps-41|F32A6.3|F32A6.3c	-0.00750548	0.965475	0.980289	-0.253909	0.261661	0.431782	-
pat-12|T17H7.4|T17H7.4f	0.0144076	0.965292	0.980142	-0.348506	0.416363	0.589182	-
F49F1.9|F49F1.9|F49F1.9	0.0593189	0.96529	0.980142	-0.176555	0.910517	0.950096	-
unc-58|T06H11.1|T06H11.1b	0.0093524	0.96516	0.980086	0.0672344	0.817679	0.893109	-
set-20|W01C8.4|W01C8.4a	-0.0144439	0.965081	0.980045	-1.1609	0.00986048	0.0410638	-
tag-310|R10E4.2|R10E4.2p	0.0222173	0.964931	0.979932	-0.0414363	0.953243	0.975918	-
mec-5|E03G2.3|E03G2.3	0.00682468	0.96484	0.979878	-0.411558	0.042348	0.118342	-
T10H9.1|T10H9.1|T10H9.1	-0.0267852	0.964443	0.979514	-0.897066	0.305352	0.479069	-
C47E8.4|C47E8.4|C47E8.4a	0.00670779	0.964155	0.97926	-0.0104469	0.956799	0.977966	-
T27A8.3|T27A8.3|T27A8.3	-0.04022	0.964027	0.979169	0.77634	0.502144	0.664891	-
F40A3.5|F40A3.5|F40A3.5	0.0116607	0.963886	0.979065	0.236204	0.492113	0.656249	-
nhr-124|C17E7.8|C17E7.8b	-0.0421762	0.963647	0.978861	-0.109611	0.935709	0.965176	-
dct-1|C14F5.1|C14F5.1a	0.0172924	0.963344	0.978592	0.150615	0.76055	0.85552	-
F28B1.3|F28B1.3|F28B1.3	-0.0842359	0.963206	0.97849	-0.406829	0.864315	NA	-
C18B10.6|C18B10.6|C18B10.6	0.0225062	0.963007	0.97836	-2.06538	0.00979749	0.0408431	N2
C06G8.3|C06G8.3	-0.015104	0.963039	0.97836	-0.650323	0.129171	0.262352	-
ZK1098.9|ZK1098.9|ZK1098.9	-0.0151379	0.962984	0.97836	0.889609	0.0347703	0.102195	-
R01H10.5|R01H10.5|R01H10.5	0.0177849	0.962737	0.97817	1.17006	0.0168821	0.0606307	-
C27A7.1|C27A7.1|C27A7.1c	0.00868731	0.962667	0.978152	-0.155874	0.523016	0.682109	-
F13H8.9|F13H8.9|F13H8.9	0.00743234	0.962681	0.978152	0.0328673	0.874997	0.928795	-
W04B5.3|W04B5.3|W04B5.3c	-0.0161333	0.96258	0.978152	0.787902	0.077224	0.18326	-
W08F4.11|W08F4.11|W08F4.11	0.0339304	0.962673	0.978152	1.92669	0.0296045	0.0905929	-
Y54E5B.5|Y54E5B.5	0.0735747	0.962527	0.978151	0.242617	0.900723	0.944093	-
C27B7.9|C27B7.9|C27B7.9	0.0194678	0.962433	0.978094	0.493567	0.354254	0.528856	-
F55C5.11|F55C5.11|F55C5.11	-0.0249032	0.962357	0.978056	0.250405	0.708809	0.822409	-
C10A4.5|C10A4.5|C10A4.5	0.0178004	0.962312	0.978056	0.459596	0.369759	0.54479	-
F59D6.2|F59D6.2|F59D6.2	0.0911157	0.962329	0.978056	0.954769	0.708599	NA	-
Y54G2A.36|Y54G2A.36|Y54G2A.36	0.017973	0.962195	0.978008	0.373194	0.44616	0.615754	-
gly-13|B0416.6|B0416.6	0.00793056	0.962126	0.977992	-0.110185	0.61372	0.753407	-
fbxb-56|Y63D3A.10|Y63D3A.10	0.0126899	0.96214	0.977992	0.952167	0.0108015	0.0439675	-
T04C12.9|T04C12.9|T04C12.9	-0.0529005	0.962114	0.977992	3.07467	0.0448114	0.12313	-
pqn-41|F53A3.4|F53A3.4c	-0.0229836	0.961983	0.977948	0.653867	0.289467	0.461416	-
gly-9|Y47D3A.23|Y47D3A.23a	0.00837808	0.961918	0.977945	-0.439504	0.0546269	0.142358	-
pbo-4|K09C8.1|K09C8.1	0.0125545	0.961941	0.977945	-0.154963	0.656972	0.783886	-
fbxa-76|Y119D3B.22|Y119D3B.22	-0.0125637	0.961932	0.977945	0.24455	0.47449	0.641147	-
clec-163|Y39A1B.1|Y39A1B.1	0.0365361	0.961919	0.977945	1.89598	0.091572	0.206673	-
T08B2.7|T08B2.7|T08B2.7b	-0.00647271	0.961403	0.977683	-0.529152	0.00229592	0.0140115	-
sma-9|T05A10.1|T05A10.1c	-0.0112503	0.96152	0.977683	-0.117606	0.702899	0.81796	-
B0261.4|B0261.4|B0261.4b	-0.00661905	0.961531	0.977683	-0.109257	0.53851	0.694051	-
F53F4.18|F53F4.18|F53F4.18	-0.00999235	0.961427	0.977683	0.60542	0.0235764	0.0771097	-
C05B5.10|C05B5.10	0.087637	0.961531	0.977683	3.17863	0.169734	NA	-
F23F1.9|F23F1.9|F23F1.9	-0.00666229	0.961308	0.977681	-0.117545	0.508573	0.670005	-
C10C6.7|C10C6.7|C10C6.7b	0.0139126	0.961338	0.977681	-0.00733966	0.984748	0.992271	-
tcer-1|ZK1127.9|ZK1127.9d	0.0208741	0.961212	0.977632	-0.848209	0.158295	0.302662	-
C55A6.12|C55A6.12|C55A6.12	-0.00969053	0.960794	0.977245	-0.304861	0.235923	0.402079	-
R04E5.8|R04E5.8|R04E5.8b	0.0258107	0.960668	0.977196	-0.385012	0.613729	0.753407	-
npp-10|ZK328.5|ZK328.5b	-0.00957298	0.960707	0.977196	-0.331315	0.187809	0.341982	-
tag-310|R10E4.2|R10E4.2r	0.0263567	0.960706	0.977196	-0.0751149	0.922924	0.957349	-
F31F7.3|F31F7.3|F31F7.3	0.0626265	0.960628	0.977196	2.08186	0.232215	0.397997	-
unc-16|ZK1098.10|ZK1098.10c	-0.017175	0.960312	0.977108	-0.430011	0.344465	0.51877	-
gly-5|Y39E4B.12|Y39E4B.12c	-0.00837575	0.960425	0.977108	-0.358015	0.105984	0.228561	-
ubh-4|C08B11.7|C08B11.7	-0.00574884	0.960435	0.977108	-0.165968	0.267483	0.437959	-
sma-10|T21D12.9|T21D12.9a	0.011837	0.960321	0.977108	-0.156384	0.616317	0.755308	-
sma-10|T21D12.9|T21D12.9b	0.0127378	0.960468	0.977108	0.000761058	0.998182	0.999037	-
Y73F8A.24|Y73F8A.24|Y73F8A.24b	-0.00916203	0.960411	0.977108	0.124042	0.602529	0.744602	-
fzr-1|ZK1307.6|ZK1307.6	0.0206808	0.960212	0.977108	0.421362	0.456385	0.625189	-
ZC178.2|ZC178.2|ZC178.2	0.0913441	0.960417	0.977108	4.49359	0.0489138	0.131306	-
C39E9.8|C39E9.8|C39E9.8f	0.0102205	0.96013	0.977076	-0.074035	0.77979	0.86764	-
F44E7.12|F44E7.12|F44E7.12	0.0230542	0.959936	0.976929	-0.153628	0.806554	0.885152	-
C25G6.3|C25G6.3|C25G6.3	0.023382	0.959947	0.976929	0.316025	0.63033	0.765388	-
W09B6.5|W09B6.5|W09B6.5	0.0289653	0.959869	0.976927	-0.0716038	0.930292	0.962185	-
C53D6.8|C53D6.8|C53D6.8	-0.0770866	0.959867	0.976927	2.91019	0.171383	0.320444	-
ark-1|C01C7.1|C01C7.1a	-0.0136311	0.959738	0.976879	0.077091	0.827032	0.898842	-
C33A12.1|C33A12.1|C33A12.1	-0.0107998	0.959745	0.976879	0.170732	0.536368	0.6926	-
Y95B8A.7|Y95B8A.7|Y95B8A.7	0.00761755	0.959577	0.976785	-0.348066	0.0777929	0.18425	-
sre-8|F40G12.1|F40G12.1	-0.0636391	0.959523	0.976785	-0.279664	0.873202	NA	-
mrpl-41|B0432.3|B0432.3	0.00844228	0.959552	0.976785	0.0250334	0.907313	0.947962	-
Y39G10AR.25|Y39G10AR.25|Y39G10AR.25	0.00886594	0.959422	0.976745	0.694353	0.00355663	0.0194245	-
arr-1|F53H8.2|F53H8.2	-0.0142563	0.959067	0.976422	-0.45342	0.216491	0.37817	-
nhr-21|F21D12.1|F21D12.1e	-0.020536	0.95886	0.97625	-0.365179	0.480965	0.646383	-
ugt-29|Y49C4A.8|Y49C4A.8a	0.0141691	0.958847	0.97625	-0.175828	0.626175	0.762153	-
dnj-12|F39B2.10|F39B2.10	0.0101765	0.958638	0.976166	-0.364977	0.150205	0.292272	-
efl-2|Y48C3A.17|Y48C3A.17a	0.0121911	0.958701	0.976166	-0.0865615	0.779182	0.867344	-
ckk-1|C05H8.1|C05H8.1a	-0.0201538	0.958672	0.976166	0.00717403	0.989031	0.994259	-
ZC487.2|ZC487.2|ZC487.2	0.093544	0.958601	0.976166	0.222098	0.925081	NA	-
ZK1290.5|ZK1290.5|ZK1290.5	0.0170651	0.958444	0.97606	0.0674132	0.873734	0.927931	-
paqr-2|Y32H12A.5|Y32H12A.5	0.0083434	0.958362	0.976032	-0.476245	0.0235709	0.0771019	-
mig-23|R07E4.4|R07E4.4	-0.00710328	0.958112	0.976032	-0.426534	0.0170924	0.0611638	-
nhr-21|F21D12.1|F21D12.1c	-0.0218576	0.958312	0.976032	-0.370293	0.494506	0.658593	-
npp-12|T23H2.1|T23H2.1	-0.00761678	0.958379	0.976032	-0.214667	0.258097	0.428178	-
dif-1|F49E8.5|F49E8.5	-0.006468	0.958259	0.976032	-0.156337	0.32797	0.501344	-
T13F2.9|T13F2.9	-0.00961334	0.958163	0.976032	0.516316	0.0295152	0.0904442	-
pqm-1|F40F8.7|F40F8.7	0.017692	0.958287	0.976032	0.666598	0.127319	0.259708	-
grl-11|ZK512.9|ZK512.9	-0.0677484	0.958201	0.976032	1.69921	0.318846	0.492313	-
imp-2|T05E11.5|T05E11.5	0.00968221	0.957881	0.975837	-0.24289	0.306448	0.47999	-
F21F8.6|F21F8.6|F21F8.6	-0.0261755	0.957804	0.975797	0.229039	0.721431	0.831382	-
C17C3.5|C17C3.5|C17C3.5	-0.0122621	0.957764	0.975795	0.592999	0.0528887	0.138951	-
C27A7.1|C27A7.1|C27A7.1b	0.00983007	0.957691	0.97576	-0.150968	0.535539	0.691975	-
str-247|B0213.9|B0213.9	0.10369	0.95765	0.975757	1.12731	0.652526	NA	-
F54F7.10|F54F7.10|F54F7.10	0.071303	0.957555	0.975755	-0.626784	0.722685	0.832034	-
hum-2|F36D4.3|F36D4.3b	-0.0159559	0.957581	0.975755	-0.332965	0.392882	0.566966	-
H36N01.5|H36N01.5	-0.0659089	0.95761	0.975755	-0.0545775	0.973646	0.986886	-
acr-19|C31H5.3|C31H5.3b	-0.0300728	0.957498	0.975755	0.950773	0.226863	0.391469	-
gap-2|ZK899.8|ZK899.8h	-0.0155067	0.957373	0.97567	-0.673702	0.0775445	0.183806	-
nhl-2|F26F4.7|F26F4.7	0.0215318	0.957267	0.975601	-0.310928	0.5601	0.711118	-
Y74C10AR.2|Y74C10AR.2|Y74C10AR.2	0.0328928	0.957197	0.975568	1.37503	0.0636151	0.158847	-
F35E8.19|F35E8.19	0.0873464	0.957019	0.975425	1.21451	0.594672	NA	-
F33D11.14|F33D11.14	0.0782555	0.956951	0.975395	3.42856	0.0673124	0.165601	-
nck-1|ZK470.5|ZK470.5b	0.0145174	0.956819	0.975299	-0.0866957	0.802668	0.882291	-
clec-182|C33D9.2|C33D9.2	-0.0451599	0.956591	0.975106	-1.02163	0.328573	0.502017	-
C24G6.6|C24G6.6|C24G6.6	0.0113849	0.956517	0.975106	-0.608146	0.0242119	0.0785286	-
ttr-49|E02C12.13|E02C12.13	0.0145595	0.956579	0.975106	-0.0937438	0.788066	0.873007	-
C27A7.1|C27A7.1|C27A7.1d	0.0101397	0.956335	0.974961	-0.149958	0.538047	0.693819	-
mfb-1|DY3.6|DY3.6	-0.0237138	0.956294	0.974959	-0.273675	0.63624	0.769394	-
nhr-21|F21D12.1|F21D12.1d	0.0209211	0.956226	0.974959	-0.259627	0.598882	0.742183	-
T07A9.8|T07A9.8|T07A9.8	0.00858314	0.956256	0.974959	-0.0991166	0.623913	0.760683	-
D2063.4|D2063.4|D2063.4	-0.00823429	0.956231	0.974959	0.404289	0.0447658	0.123044	-
sma-10|T21D12.9|T21D12.9c	0.0178449	0.95612	0.974937	-0.594222	0.190467	0.345673	-
R13A1.7|R13A1.7|R13A1.7	0.0377172	0.956067	0.974922	-0.579805	0.542883	0.697975	-
srh-34|M02H5.10|M02H5.10	-0.100082	0.955981	0.974874	0.265603	0.910226	NA	-
str-188|F40F9.4|F40F9.4	0.0751843	0.955974	0.974874	0.856875	0.660669	NA	-
F20A1.4|F20A1.4|F20A1.4	-0.0228253	0.955882	0.97485	1.25362	0.0333188	0.0989002	-
F13G3.3|F13G3.3|F13G3.3a	-0.0221424	0.955831	0.974836	0.00558507	0.991785	0.995641	-
gap-2|ZK899.8|ZK899.8e	-0.0161531	0.95553	0.974597	-0.678071	0.0752301	0.179878	-
F02E9.9|F02E9.9|F02E9.9b	0.00616163	0.955504	0.974597	-0.295095	0.0390313	0.111253	-
Y54E5B.2|Y54E5B.2|Y54E5B.2	-0.007561	0.955506	0.974597	-0.177355	0.315507	0.489213	-
ZK757.4|ZK757.4|ZK757.4a	0.00866224	0.955437	0.974597	-0.152027	0.459248	0.627538	-
clec-29|T25E12.9|T25E12.9	0.0698972	0.955452	0.974597	0.966111	0.548119	0.702308	-
srg-24|Y25C1A.12|Y25C1A.12	-0.0531894	0.955558	0.974597	2.06273	0.214683	0.376175	-
R07B5.10|R07B5.10	0.0286215	0.955252	0.974518	0.915523	0.126199	0.25796	-
T11A5.8|T11A5.8	0.0286215	0.955252	0.974518	0.915523	0.126199	0.25796	-
C41G6.13|C41G6.13|C41G6.13	0.0914077	0.954963	0.974301	-2.47597	0.265288	NA	-
Y75B12B.8|Y75B12B.8|Y75B12B.8	0.0914077	0.954963	0.974301	-2.47597	0.265288	NA	-
Y39A3CL.7|Y39A3CL.7|Y39A3CL.7b	0.0127159	0.954825	0.974271	-0.46421	0.116007	0.243805	-
F25B5.5|F25B5.5|F25B5.5	0.00767826	0.954857	0.974271	-0.241332	0.169748	0.31814	-
ZK105.11|ZK105.11|ZK105.11	-0.0464373	0.954705	0.974195	-0.630039	0.566406	0.716818	-
saps-1|C47G2.5|C47G2.5c	-0.0210189	0.954676	0.974195	-0.51131	0.300073	0.473117	-
ccr-4|ZC518.3|ZC518.3a	0.0159063	0.954675	0.974195	-0.479534	0.210299	0.370689	-
lec-1|W09H1.6|W09H1.6a	0.00677972	0.954652	0.974195	0.0135281	0.930257	0.962185	-
lgc-23|C15A7.1|C15A7.1	-0.042519	0.954552	0.974193	1.19516	0.295061	0.467921	-
col-2|W01B6.7|W01B6.7	0.0443205	0.954456	0.974135	1.98072	0.106195	0.228896	-
pop-1|W10C8.2|W10C8.2	0.0160532	0.954252	0.973966	-0.591325	0.125314	0.25675	-
srz-100|T25E12.11|T25E12.11	0.111924	0.954187	0.973938	-1.71448	0.490058	NA	-
F26A10.1|F26A10.1|F26A10.1	0.023041	0.954154	0.973938	-0.176514	0.741346	0.843887	-
C40H5.2|C40H5.2|C40H5.2a	0.0228188	0.954122	0.973938	0.300664	0.581874	0.728657	-
C16A3.5|C16A3.5|C16A3.5	0.0106682	0.954072	0.973937	0.0916595	0.701528	0.817061	-
Y77E11A.6|Y77E11A.6|Y77E11A.6	0.0116436	0.954056	0.973937	0.236143	0.362644	0.537438	-
F41G4.1|F41G4.1|F41G4.1	0.0178651	0.953959	0.973937	0.460021	0.28231	0.454039	-
K09G1.2|K09G1.2|K09G1.2	0.0162396	0.954072	0.973937	0.467018	0.204747	0.364017	-
C39E9.8|C39E9.8|C39E9.8d	0.0139828	0.953888	0.973905	-0.421633	0.178659	0.329577	-
Y26E6A.3|Y26E6A.3|Y26E6A.3	0.0164988	0.953863	0.973905	0.0330805	0.928831	0.961278	-
rab-11.2|W04G5.2	-0.0328219	0.953723	0.973829	0.354302	0.646348	0.776042	-
col-102|C18H7.3|C18H7.3	0.0842441	0.953738	0.973829	1.21083	0.54167	NA	-
ubc-26|Y110A2AM.3|Y110A2AM.3	-0.0166281	0.953578	0.973744	-0.634113	0.104414	0.226188	-
pde-1|T04D3.3|T04D3.3b	-0.016299	0.953458	0.973661	0.481217	0.202076	0.360652	-
E04D5.1|E04D5.1|E04D5.1a	0.0114095	0.953419	0.97366	-0.505822	0.0452889	0.124065	-
ttr-48|ZC64.2|ZC64.2	-0.0125109	0.953187	0.973462	-0.584552	0.0343571	0.101332	-
lars-2|ZK524.3|ZK524.3b	-0.0176339	0.953104	0.973417	0.251623	0.515508	0.675844	-
srw-60|T11F1.1|T11F1.1	0.0907425	0.952983	0.973332	2.12536	0.341599	0.515752	-
unc-18|F27D9.1|F27D9.1c	0.00708417	0.952896	0.973282	-0.0042154	0.978765	0.989055	-
pde-1|T04D3.3|T04D3.3a	-0.0185414	0.952858	0.973282	0.342537	0.425985	0.597866	-
Y105E8A.27|Y105E8A.27|Y105E8A.27	-0.0137886	0.952754	0.973214	0.416041	0.169912	0.318325	-
kcnl-2|F08A10.1|F08A10.1c	0.01292	0.952714	0.973213	-0.578082	0.0550269	0.143036	-
exos-4.2|Y6D11A.1|Y6D11A.1	-0.0111305	0.952697	0.973213	-0.0744903	0.758114	0.85448	-
F38B2.2|F38B2.2|F38B2.2	-0.0244278	0.952652	0.973213	0.377333	0.501206	0.664273	-
math-27|F36H5.2|F36H5.2b	0.0146234	0.952534	0.973145	0.0892533	0.779004	0.867277	-
C34F11.8|C34F11.8|C34F11.8	0.0275602	0.952458	0.973106	0.5701	0.339497	0.513587	-
stip-1|C07E3.1|C07E3.1b	0.0223675	0.952368	0.9731	-0.928864	0.0671107	0.165254	-
MTCE.4|MTCE.4|MTCE.4	0.0278019	0.952413	0.9731	0.390605	0.517621	0.677671	-
T27C4.1|T27C4.1|T27C4.1	-0.0138333	0.952383	0.9731	0.406125	0.176875	0.327073	-
Y6B3B.7|Y6B3B.7|Y6B3B.7	0.0270484	0.952375	0.9731	0.407598	0.494446	0.658593	-
ckk-1|C05H8.1|C05H8.1b	-0.024085	0.951958	0.972835	-0.0327411	0.951234	0.974758	-
skn-1|T19E7.2|T19E7.2b	0.0118153	0.95192	0.972835	-0.00252426	0.992093	0.995817	-
fbxb-34|W08F4.2|W08F4.2	0.0692212	0.951977	0.972835	0.0500713	0.974977	0.987288	-
C17B7.14|C17B7.14|C17B7.14	0.0718974	0.952002	0.972835	0.361407	0.823744	0.896781	-
F28B3.10|F28B3.10|F28B3.10	-0.00909422	0.951684	0.972666	-0.0612683	0.751796	0.850847	-
Y71H2AM.10|Y71H2AM.10|Y71H2AM.10	0.0156817	0.95151	0.972526	0.475253	0.166796	0.314382	-
H12I13.2|H12I13.2|H12I13.2	-0.0287185	0.951456	0.972511	1.62182	0.0231495	0.0761603	-
Y44A6D.2|Y44A6D.2|Y44A6D.2	-0.0180924	0.95139	0.972482	-0.0862976	0.824794	0.897407	-
Y49F6B.6|Y49F6B.6|Y49F6B.6	-0.0783656	0.950625	0.972352	-0.900547	0.487288	0.652474	-
crml-1|K07G5.1|K07G5.1	-0.0204904	0.951102	0.972352	-0.713874	0.099107	0.218172	-
plx-1|Y55F3AL.1|Y55F3AL.1	0.0140826	0.951142	0.972352	-0.45008	0.134925	0.270522	-
spg-7|Y47G6A.10|Y47G6A.10	-0.00886225	0.950137	0.972352	-0.412823	0.0264165	0.0832575	-
ZC262.3|ZC262.3|ZC262.3b	-0.0130395	0.950423	0.972352	-0.376037	0.178054	0.328757	-
cif-1|K08F11.3|K08F11.3	-0.00724753	0.950013	0.972352	-0.291777	0.05091	0.135068	-
nhr-21|F21D12.1|F21D12.1b	0.0230088	0.950764	0.972352	-0.253522	0.600545	0.743311	-
F21G4.6|F21G4.6|F21G4.6	0.0119688	0.950548	0.972352	-0.218105	0.392128	0.56631	-
M03F8.7|M03F8.7|M03F8.7	-0.121255	0.951114	0.972352	-0.13402	0.957884	NA	-
hint-1|F21C3.3|F21C3.3	0.0122985	0.950699	0.972352	-0.0361433	0.887864	0.936496	-
C26B9.6|C26B9.6|C26B9.6	-0.0218722	0.950683	0.972352	0.112258	0.811328	0.888546	-
bath-35|W02A11.8|W02A11.8	-0.0134779	0.950039	0.972352	0.167415	0.546215	0.700595	-
nhr-95|Y39B6A.17|Y39B6A.17a	0.00949341	0.951008	0.972352	0.230153	0.259383	0.429354	-
F31B12.4|F31B12.4|F31B12.4	-0.038977	0.950434	0.972352	0.375322	0.660926	0.786979	-
F14D2.14|F14D2.14|F14D2.14	0.0204948	0.950509	0.972352	0.442967	0.297404	0.470547	-
C49C3.5|C49C3.5|C49C3.5	-0.0131407	0.950751	0.972352	0.447623	0.104799	0.226822	-
ZK858.8|ZK858.8|ZK858.8	-0.0125466	0.950141	0.972352	0.717809	0.00589007	0.0277994	-
C16C10.13|C16C10.13|C16C10.13	0.0162923	0.950359	0.972352	1.07442	0.00196092	0.012505	-
srz-99|T25E12.13|T25E12.13	-0.0443283	0.950477	0.972352	1.1534	0.2931	0.465353	-
C06G4.7|C06G4.7	-0.064533	0.951188	0.972352	1.3116	0.381091	0.555666	-
C06G4.t1|C06G4.t1	-0.064533	0.951188	0.972352	1.3116	0.381091	0.555666	-
F22B7.15|F22B7.15	-0.064533	0.951188	0.972352	1.3116	0.381091	0.555666	-
F22B7.t3|F22B7.t3	-0.064533	0.951188	0.972352	1.3116	0.381091	0.555666	-
F22B7.t4|F22B7.t4	-0.064533	0.951188	0.972352	1.3116	0.381091	0.555666	-
K05G3.t1|K05G3.t1	-0.064533	0.951188	0.972352	1.3116	0.381091	0.555666	-
K08B5.5|K08B5.5	-0.064533	0.951188	0.972352	1.3116	0.381091	0.555666	-
K08B5.t1|K08B5.t1	-0.064533	0.951188	0.972352	1.3116	0.381091	0.555666	-
T25D1.t2|T25D1.t2	-0.064533	0.951188	0.972352	1.3116	0.381091	0.555666	-
T27B1.t1|T27B1.t1	-0.064533	0.951188	0.972352	1.3116	0.381091	0.555666	-
T28B4.14|T28B4.14	-0.064533	0.951188	0.972352	1.3116	0.381091	0.555666	-
T28B4.t1|T28B4.t1	-0.064533	0.951188	0.972352	1.3116	0.381091	0.555666	-
Y66D12A.t1|Y66D12A.t1	-0.064533	0.951188	0.972352	1.3116	0.381091	0.555666	-
ZC412.t1|ZC412.t1	-0.064533	0.951188	0.972352	1.3116	0.381091	0.555666	-
Y39A3B.3|Y39A3B.3|Y39A3B.3	-0.0413695	0.951225	0.972352	1.64942	0.105523	0.227907	-
T25B9.13|T25B9.13	-0.100394	0.949832	0.972251	0.280067	0.893672	NA	-
F39E9.9|F39E9.9	-0.102236	0.949559	0.972011	1.26103	0.562882	NA	-
T02G5.3|T02G5.3|T02G5.3	0.0691649	0.94933	0.971815	-0.776336	0.591175	0.736245	-
tag-310|R10E4.2|R10E4.2a	0.0341441	0.949259	0.971781	-0.0822298	0.915823	0.953003	-
ran-2|C29E4.3|C29E4.3a	0.00720227	0.949192	0.971752	-0.353526	0.0165283	0.0598153	-
dlc-6|Y106G6G.3|Y106G6G.3	0.0230806	0.949091	0.971687	0.705873	0.13456	0.270018	-
deg-1|C47C12.6|C47C12.6	-0.0167979	0.948964	0.971596	0.315623	0.35656	0.531053	-
lin-13|C03B8.4|C03B8.4	-0.011795	0.948917	0.971588	-0.325744	0.174081	0.32354	-
C14F11.1|C14F11.1|C14F11.1a	-0.00861092	0.94879	0.971496	-0.370853	0.0333421	0.0989424	-
dcp-66|C26C6.5|C26C6.5b	-0.0187344	0.948771	0.971496	0.0373818	0.923566	0.957646	-
rme-8|F18C12.2|F18C12.2a	0.00986196	0.948643	0.971423	-0.213448	0.285736	0.4576	-
Y39B6A.5|Y39B6A.5|Y39B6A.5a	0.0153065	0.948547	0.971364	0.471414	0.123591	0.254112	-
C45G9.8|C45G9.8|C45G9.8	0.0274214	0.948391	0.971243	-0.597437	0.279371	0.451027	-
C35C5.3|C35C5.3|C35C5.3a	0.0105351	0.948348	0.971238	-0.277199	0.193561	0.349572	-
Y69H2.9|Y69H2.9|Y69H2.9	0.0183608	0.948276	0.971204	-1.02794	0.0057502	0.0273073	-
R10E8.5|R10E8.5|R10E8.5	0.135062	0.948253	0.971204	3.81917	0.123239	NA	-
K10E9.1|K10E9.1|K10E9.1	-0.025961	0.948189	0.971192	0.264239	0.626748	0.762573	-
C09G9.1|C09G9.1|C09G9.1	-0.00997807	0.948066	0.971169	-0.267525	0.178546	0.329442	-
srh-221|C04F2.2	-0.0837045	0.948081	0.971169	0.145197	0.93482	0.964664	-
T06E6.10|T06E6.10|T06E6.10	0.0172057	0.948128	0.971169	0.193753	0.571461	0.720995	-
F41G4.8|F41G4.8|F41G4.8	0.0181724	0.948024	0.971169	0.427918	0.243694	0.41118	-
C28C12.11|C28C12.11|C28C12.11a	0.0114394	0.947941	0.971169	0.430195	0.0613304	0.154653	-
nhr-6|C48D5.1|C48D5.1a	0.0273506	0.948107	0.971169	0.503796	0.364187	0.538943	-
ikb-1|C04F12.3|C04F12.3	-0.0170253	0.947917	0.971169	0.600082	0.0766564	0.182336	-
C10G11.7|C10G11.7|C10G11.7	-0.0188033	0.947415	0.970711	-0.64757	0.0788434	0.185857	-
Y39B6A.5|Y39B6A.5|Y39B6A.5b	0.0161281	0.947381	0.970711	0.558447	0.0763264	0.181692	-
gly-9|Y47D3A.23|Y47D3A.23b	-0.0158583	0.947247	0.970623	-1.18261	0.00021435	0.0025137	-
ZC123.4|ZC123.4|ZC123.4b	0.0218368	0.94716	0.970623	-0.221032	0.618932	0.75713	-
F09F9.3|F09F9.3|F09F9.3	0.0369711	0.947253	0.970623	0.29877	0.687506	0.806803	-
C01B10.44|C01B10.44|C01B10.44	0.0160336	0.947252	0.970623	0.737312	0.020354	0.0694508	-
str-182|C12D8.12|C12D8.12	0.048274	0.947009	0.970529	-0.714037	0.483611	0.649035	-
W02B12.9|W02B12.9|W02B12.9	0.0134399	0.94695	0.970507	-0.408494	0.119617	0.248806	-
Y54G2A.13|Y54G2A.13|Y54G2A.13	-0.0156404	0.946744	0.970335	0.729218	0.017008	0.060949	-
rme-8|F18C12.2|F18C12.2b	0.0204402	0.946574	0.97022	-0.5369	0.180731	0.332051	-
nars-1|F22D6.3	-0.0109173	0.946594	0.97022	0.0592783	0.778148	0.866763	-
F35H8.1|F35H8.1|F35H8.1	0.0184603	0.946575	0.97022	0.969491	0.00695208	0.0315843	-
dpy-31|R151.5|R151.5a	-0.0166028	0.946399	0.970145	-0.286803	0.372644	0.547692	-
ZC262.8|ZC262.8|ZC262.8	0.0126527	0.946407	0.970145	0.105485	0.664297	0.789631	-
rme-1|W06H8.1|W06H8.1d	-0.0136108	0.946175	0.969986	-0.223397	0.39287	0.566966	-
gsp-4|T03F1.5|T03F1.5	0.0107099	0.945964	0.969807	0.238205	0.243908	0.411313	-
E01A2.8|E01A2.8|E01A2.8	-0.0873777	0.945953	0.969807	2.34273	0.192529	0.348352	-
C15B12.6|C15B12.6|C15B12.6	-0.0162815	0.945839	0.969757	-0.143771	0.657867	0.784763	-
W08G11.3|W08G11.3|W08G11.3b	0.0161103	0.945767	0.969722	-0.70023	0.024335	0.078824	-
sri-2|F36G9.9|F36G9.9	-0.0815157	0.945494	0.969679	-1.792	0.246796	0.414561	-
sqv-6|Y50D4C.4|Y50D4C.4	0.0167442	0.945566	0.969679	-0.0701967	0.829876	0.900418	-
T23C6.4|T23C6.4|T23C6.4	0.0130352	0.945572	0.969679	0.0377228	0.879829	0.931891	-
R119.2|R119.2|R119.2	-0.0174367	0.945687	0.969679	0.146923	0.656057	0.783399	-
F21F8.2|F21F8.2|F21F8.2	0.0519664	0.945684	0.969679	0.668996	0.568801	0.718929	-
F59A1.11|F59A1.11|F59A1.11b	-0.0419023	0.945466	0.969679	0.878368	0.277284	0.448869	-
srd-60|C13B7.3|C13B7.3	0.0662714	0.945674	0.969679	1.89821	0.189662	0.344589	-
srd-73|Y45G12C.7|Y45G12C.7	0.0662714	0.945674	0.969679	1.89821	0.189662	0.344589	-
T10D4.1|T10D4.1|T10D4.1	0.064476	0.94549	0.969679	2.09919	0.0960828	0.213534	-
nhr-274|Y41D4B.21|Y41D4B.21	0.0115444	0.9452	0.96953	-0.400626	0.0777297	0.184157	-
F26F12.5|F26F12.5|F26F12.5b	0.0218549	0.945165	0.96953	0.806417	0.0493107	0.131989	-
col-147|T06E4.4|T06E4.4	-0.0265023	0.94512	0.969526	0.848964	0.0879042	0.200666	-
Y39D8A.1|Y39D8A.1|Y39D8A.1c	-0.0413755	0.94493	0.96937	-0.447628	0.568162	0.718539	-
nhr-198|K06B4.8|K06B4.8	-0.0980032	0.944792	0.969268	-0.280668	0.86455	0.922454	-
C31H5.5|C31H5.5|C31H5.5	-0.0194821	0.944576	0.969119	-0.0869494	0.816924	0.892452	-
elt-3|K02B9.4|K02B9.4a	0.0253285	0.94461	0.969119	0.186148	0.696339	0.813412	-
dpy-23|R160.1|R160.1b	-0.0192269	0.944434	0.969017	-0.246419	0.497131	0.660822	-
C16D9.9|C16D9.9|C16D9.9	-0.0310066	0.944254	0.968871	1.40789	0.0132086	0.0508309	-
R02D5.6|R02D5.6|R02D5.6c	-0.0395666	0.944148	0.968801	-0.408414	0.630302	0.765388	-
frm-9|F31B12.3|F31B12.3b	-0.0303785	0.943963	0.968801	-0.319872	0.608857	0.74959	-
psd-1|B0361.5|B0361.5b	-0.00607041	0.944006	0.968801	-0.253915	0.0252608	0.0810307	-
C56G2.15|C56G2.15|C56G2.15	0.0156515	0.944135	0.968801	-0.235392	0.416711	0.589419	-
C05E7.4|C05E7.4|C05E7.4	-0.05168	0.944099	0.968801	-0.131055	0.895893	0.941202	-
gstk-1|ZK1320.1|ZK1320.1	0.013891	0.94414	0.968801	0.151447	0.554747	0.706736	-
cka-2|C52B9.1|C52B9.1b	0.0112659	0.943947	0.968801	0.16408	0.454425	0.622991	-
zig-1|K10C3.3|K10C3.3	0.00830168	0.943873	0.968792	-0.209006	0.175523	0.325579	-
frm-9|F31B12.3|F31B12.3a	-0.0306909	0.943796	0.968781	-0.324345	0.606372	0.747507	-
F44A2.3|F44A2.3|F44A2.3	0.0286684	0.943825	0.968781	0.0354967	0.947009	0.972063	-
math-26|F36H5.1|F36H5.1	-0.014085	0.943807	0.968781	0.0623925	0.80966	0.887471	-
C35B8.3|C35B8.3|C35B8.3b	0.013929	0.943638	0.968706	-0.136855	0.594293	0.738704	-
lin-10|C09H6.2|C09H6.2a	-0.0161295	0.943257	0.968454	-0.68403	0.0232308	0.076356	-
lin-10|C09H6.2|C09H6.2c	-0.0161295	0.943257	0.968454	-0.68403	0.0232308	0.076356	-
F43G9.12|F43G9.12|F43G9.12	0.0124706	0.943349	0.968454	0.0223573	0.92157	0.956787	-
gst-39|Y53F4B.33|Y53F4B.33	-0.0110522	0.943349	0.968454	0.176626	0.386692	0.561145	-
K10D11.6|K10D11.6|K10D11.6	0.0275039	0.943354	0.968454	0.35676	0.480927	0.646383	-
rer-1|F46C5.8|F46C5.8	0.0112716	0.943135	0.968424	-0.345537	0.0918826	0.207046	-
arx-1|Y71F9AL.16|Y71F9AL.16	-0.0152703	0.942991	0.968402	-0.778742	0.00534613	0.02591	-
K01A11.1|K01A11.1|K01A11.1	0.0288998	0.943077	0.968402	-0.459599	0.396018	0.569558	-
ppw-1|C18E3.7|C18E3.7a	0.00845582	0.943067	0.968402	-0.370525	0.016539	0.0598278	-
acr-19|C31H5.3|C31H5.3a	0.0382158	0.943017	0.968402	0.824554	0.26805	0.438522	-
T02B11.3|T02B11.3|T02B11.3b	-0.0170113	0.942812	0.968287	-0.420785	0.17314	0.322436	-
glt-7|W03G1.1|W03G1.1	0.0219345	0.942782	0.968287	-0.296945	0.502223	0.664959	-
C15B12.2|C15B12.2|C15B12.2	-0.0644897	0.942551	0.968096	0.126499	0.913632	0.951673	-
F56D1.9|F56D1.9	-0.0736314	0.942493	0.968075	0.295756	0.831085	0.90137	-
F41G3.5|F41G3.5|F41G3.5	0.0207754	0.942428	0.968048	0.927289	0.0127123	0.0495347	-
T27A3.1|T27A3.1|T27A3.1c	0.0144416	0.942234	0.967887	-0.45562	0.0824817	0.191666	-
elt-1|W09C2.1|W09C2.1b	0.0137309	0.942231	0.967887	0.386934	0.135634	0.271589	-
tag-38|B0222.4|B0222.4	0.0330797	0.942084	0.967811	-1.04453	0.0801398	0.187907	-
C54E10.3|C54E10.3|C54E10.3	0.0654692	0.942047	0.967811	-0.423122	0.734967	0.839665	-
W03A5.5|W03A5.5|W03A5.5	0.0294522	0.941985	0.967788	0.0914886	0.872462	0.927267	-
F57G8.5|F57G8.5|F57G8.5	0.0284886	0.941747	0.967581	0.0775668	0.882582	0.933051	-
pqn-48|K07D4.8|K07D4.8	-0.0156851	0.941675	0.967546	-0.00531319	0.984995	0.992439	-
R11B5.11|R11B5.11	-0.0539749	0.941507	0.967426	-0.0916965	0.927461	0.960343	-
R04B5.7|R04B5.7|R04B5.7	-0.0557088	0.94152	0.967426	0.509248	0.636642	0.769663	-
F21A10.1|F21A10.1|F21A10.1b	0.019804	0.941369	0.967349	-0.0777108	0.824815	0.897407	-
cpn-3|F28H1.2|F28H1.2	0.0124569	0.941317	0.967349	0.187221	0.391709	0.565982	-
pde-4|R153.1|R153.1f	-0.0585425	0.941352	0.967349	0.79074	0.46527	0.633012	-
C52B9.16|C52B9.16	-0.151406	0.941297	0.967349	3.60175	0.160701	NA	-
F46F11.6|F46F11.6|F46F11.6	-0.00948607	0.941216	0.967347	-0.45603	0.00654756	0.0301372	-
Y55F3C.4|Y55F3C.4|Y55F3C.4	-0.0856001	0.941172	0.967341	0.41841	0.787748	0.872813	-
Y59A8B.21|Y59A8B.21|Y59A8B.21	-0.0309594	0.940982	0.967185	-0.262337	0.644106	0.774714	-
C39E9.8|C39E9.8|C39E9.8e	0.0178162	0.940866	0.967109	-0.434499	0.161921	0.307938	-
fbxa-62|C39B5.3|C39B5.3	0.0610055	0.940871	0.967109	0.246001	0.819656	0.894153	-
rgs-1|C05B5.7|C05B5.7b	-0.0323709	0.940762	0.967075	-0.204293	0.74167	0.84405	-
VT23B5.1|VT23B5.1	0.0935662	0.940702	0.967052	0.277155	0.87	0.925773	-
R08E3.3|R08E3.3|R08E3.3a	-0.0187862	0.940445	0.966838	-0.592618	0.0750406	0.179543	-
nkat-3|R03A10.4|R03A10.4b	-0.0145785	0.940456	0.966838	-0.386321	0.126788	0.258905	-
M01B2.10|M01B2.10|M01B2.10	0.0227647	0.940426	0.966838	0.0182006	0.963375	0.981313	-
C03H12.3|C03H12.3	0.103047	0.940351	0.966838	0.0309999	0.987148	0.993343	-
bmk-1|F23B12.8|F23B12.8a	-0.0118513	0.940141	0.966671	-0.351333	0.0863557	0.198108	-
B0252.1|B0252.1|B0252.1	0.0289931	0.940137	0.966671	-0.0439525	0.934888	0.964694	-
F40F4.6|F40F4.6|F40F4.6	0.0140964	0.940049	0.966654	-0.304056	0.211292	0.371852	-
mek-1|K08A8.1|K08A8.1a	-0.00981199	0.939953	0.966593	-0.170973	0.312392	0.486395	-
M02F4.3|M02F4.3|M02F4.3	-0.015068	0.93983	0.966506	-0.0532897	0.841766	0.908977	-
F27B10.1|F27B10.1|F27B10.1	-0.014523	0.939804	0.966506	0.159692	0.531299	0.688519	-
nhr-174|E03H4.6|E03H4.6	0.126579	0.939819	0.966506	0.800537	0.652311	NA	-
C25D7.16|C25D7.16|C25D7.16	0.0230784	0.939639	0.966426	0.916788	0.0206184	0.0700015	-
F07H5.3|F07H5.3	0.0107439	0.939494	0.966316	-0.0550011	0.763746	0.857375	-
C29E4.10|C29E4.10|C29E4.10	0.0212401	0.939402	0.96626	0.0965931	0.795328	0.877183	-
daf-16|R13H8.1|R13H8.1h	-0.0145495	0.939292	0.966186	-0.1711	0.491861	0.655984	-
eftu-2|ZK328.2|ZK328.2	-0.00989299	0.939201	0.966131	-0.306456	0.0690443	0.168829	-
ubc-22|C06E2.7|C06E2.7	-0.0296729	0.939134	0.966102	0.356662	0.483243	0.648793	-
nhr-49|K10C3.6|K10C3.6b	0.0315923	0.938921	0.965921	-0.168993	0.753302	0.851609	-
F54E4.2|F54E4.2|F54E4.2	0.0690411	0.938786	0.965822	-1.40883	0.233026	0.398913	-
smk-1|F41E6.4|F41E6.4b	0.0261445	0.938661	0.965799	-0.604095	0.187193	0.341135	-
ttr-35|F22A3.2|F22A3.2	0.0166129	0.938726	0.965799	0.048102	0.863019	0.921542	-
Y62H9A.15|Y62H9A.15|Y62H9A.15	-0.0346192	0.938726	0.965799	0.128884	0.823978	0.896954	-
Y62E10A.20|Y62E10A.20|Y62E10A.20	-0.0101106	0.93848	0.965662	-0.0124603	0.941593	0.968876	-
Y48C3A.12|Y48C3A.12|Y48C3A.12	0.0271001	0.938398	0.965635	-0.133989	0.777233	0.866445	-
unc-49|T21C12.1|T21C12.1g	0.0485873	0.938416	0.965635	0.649482	0.460333	0.628421	-
F48G7.10|F48G7.10|F48G7.10	0.0340784	0.938316	0.96561	0.753042	0.211487	0.372142	-
glb-22|R11H6.3|R11H6.3	-0.0249883	0.938128	0.96549	0.15766	0.718539	0.829354	-
T02H6.11|T02H6.11|T02H6.11	0.0225205	0.938162	0.96549	0.377107	0.314209	0.487698	-
hel-1|C26D10.2|C26D10.2b	-0.0337636	0.938071	0.965474	-0.789379	0.160448	0.305876	-
itr-1|F33D4.2|F33D4.2e	-0.0183787	0.938055	0.965474	-0.442609	0.153935	0.297455	-
D2005.4|D2005.4|D2005.4	-0.0130148	0.93797	0.965474	-0.419813	0.0530771	0.139311	-
R11D1.12|R11D1.12|R11D1.12b	0.0249243	0.937936	0.965474	0.579813	0.177259	0.327684	-
srab-16|R13D11.6|R13D11.6	-0.0921202	0.9379	0.965474	2.0351	0.178356	0.329167	-
sre-39|F10G7.7|F10G7.7	0.184686	0.938028	0.965474	3.31324	0.260535	0.430766	-
ZK262.3|ZK262.3|ZK262.3	-0.0410844	0.93784	0.96547	0.797799	0.263414	0.433306	-
srw-40|Y52E8A.5|Y52E8A.5	0.169947	0.937776	0.965443	2.28408	0.406011	NA	-
Y73B6A.6|Y73B6A.6|Y73B6A.6	-0.119418	0.937636	0.965338	-0.0622308	0.975348	0.987341	-
C55F2.1|C55F2.1|C55F2.1b	-0.017687	0.937359	0.965092	-0.867062	0.00295753	0.0169605	-
srx-77|K03B4.5|K03B4.5	0.112688	0.937266	0.965092	-0.852468	0.692199	0.81035	-
unc-73|F55C7.7|F55C7.7b	0.0191364	0.937318	0.965092	-0.580494	0.0841487	0.194353	-
gpa-15|M04C7.1|M04C7.1	0.0230283	0.937333	0.965092	0.528133	0.166274	0.313664	-
tag-310|R10E4.2|R10E4.2c	-0.0387743	0.937178	0.965061	-0.151384	0.831632	0.901685	-
F13G3.3|F13G3.3|F13G3.3b	0.0286553	0.937048	0.964966	0.0260041	0.957043	0.978088	-
C27A7.5|C27A7.5|C27A7.5d	-0.00964204	0.936964	0.964925	-0.0941038	0.557416	0.709142	-
fbxa-167|C31C9.3|C31C9.3	0.0171566	0.936971	0.964925	-0.0818717	0.773333	0.864299	-
F07C6.4|F07C6.4|F07C6.4b	0.0152536	0.936838	0.964867	-0.0800416	0.75082	0.85032	-
C18H7.6|C18H7.6|C18H7.6	-0.0810782	0.936585	0.964645	0.368395	0.789893	0.873887	-
abts-3|F57F10.1|F57F10.1a	0.0158704	0.936462	0.964557	0.0889204	0.743423	0.845236	-
R02D5.6|R02D5.6|R02D5.6a	-0.044719	0.936332	0.964481	-0.394345	0.636069	0.769272	-
C08E8.10|C08E8.10|C08E8.10	-0.0197523	0.936351	0.964481	0.197452	0.545485	0.70001	-
twk-34|K06B4.12|K06B4.12	-0.0293256	0.93617	0.964374	-1.01038	0.0410439	0.11554	-
R11G10.4|R11G10.4|R11G10.4	0.0956376	0.936171	0.964374	0.953452	0.479163	0.644832	-
ZC239.4|ZC239.4|ZC239.4	-0.0486812	0.935986	0.964313	-0.670636	0.418039	0.590701	-
spk-1|B0464.5|B0464.5a	-0.0245277	0.936036	0.964313	-0.209593	0.600636	0.743311	-
rfs-1|C30A5.2|C30A5.2	-0.0224714	0.936025	0.964313	0.132444	0.72114	0.831144	-
ran-2|C29E4.3|C29E4.3b	0.00944255	0.935843	0.964231	-0.388202	0.0108745	0.0441841	-
ZC376.3|ZC376.3|ZC376.3	-0.0228588	0.935661	0.964104	-0.554262	0.1374	0.274064	-
ymel-1|M03C11.5|M03C11.5	0.0133925	0.935682	0.964104	-0.191662	0.374129	0.549169	-
Y104H12D.2|Y104H12D.2|Y104H12D.2	-0.012052	0.935671	0.964104	-0.0831438	0.666339	0.790909	-
F14D7.6|F14D7.6|F14D7.6a	0.0279112	0.935516	0.96405	0.518467	0.24713	0.414979	-
C34B4.5|C34B4.5|C34B4.5	-0.0655595	0.935359	0.963927	0.403641	0.736353	0.8407	-
nas-28|F42A10.8|F42A10.8	0.0249822	0.935317	0.963922	0.145494	0.741218	0.843887	-
C39E9.8|C39E9.8|C39E9.8b	0.0174827	0.935278	0.963921	-0.300981	0.280195	0.451793	-
Y51A2D.8|Y51A2D.8|Y51A2D.8	0.0397891	0.935202	0.963882	-0.151994	0.794852	0.876922	-
pqn-75|W03D2.1|W03D2.1b	0.0219187	0.935101	0.963816	0.555868	0.110806	0.236116	-
T02G6.3|T02G6.3|T02G6.3	-0.0630876	0.935074	0.963816	2.30428	0.0887852	0.202015	-
T27A8.5|T27A8.5|T27A8.5	-0.0676559	0.934916	0.963715	-2.06199	0.0906898	0.205154	-
Y62E10A.10|Y62E10A.10|Y62E10A.10	-0.00814125	0.934928	0.963715	-0.19201	0.138419	0.27548	-
riok-2|Y105E8B.3|Y105E8B.3	-0.00906619	0.934876	0.963715	-0.0585573	0.683489	0.803985	-
B0379.1|B0379.1|B0379.1a	0.0116611	0.93476	0.963659	0.0142527	0.939368	0.967526	-
sru-39|F46B6.11|F46B6.11	-0.082204	0.934647	0.963581	1.3432	0.39719	0.571008	-
K05F1.6|K05F1.6|K05F1.6a	-0.0267716	0.934604	0.963576	-0.465485	0.281441	0.453146	-
math-16|C16C4.8|C16C4.8	-0.101739	0.934508	0.963516	1.5005	0.352086	0.526755	-
Y51H7BR.8|Y51H7BR.8|Y51H7BR.8	0.0929731	0.934269	0.963308	0.741347	0.615707	0.754955	-
Y55F3AR.1|Y55F3AR.1|Y55F3AR.1	0.00987974	0.934211	0.963288	-0.243095	0.117678	0.246352	-
T23G4.126|T23G4.126	-0.109576	0.933912	0.963018	-0.439859	0.768628	0.860631	-
F26C11.4|F26C11.4|F26C11.4	0.0962104	0.93389	0.963018	-0.111011	0.938348	0.967085	-
K04F1.12|K04F1.12|K04F1.12	-0.0735879	0.933864	0.963018	0.0669219	0.953765	0.976163	-
T25B9.3|T25B9.3|T25B9.3b	0.054208	0.933639	0.962853	0.372321	0.671909	0.795365	-
itr-1|F33D4.2|F33D4.2d	-0.0197541	0.933504	0.962752	-0.444574	0.152567	0.29572	-
mek-1|K08A8.1|K08A8.1b	0.0302047	0.933296	0.962594	-0.757901	0.106468	0.229281	-
gcy-28|T01A4.1|T01A4.1c	0.0236771	0.933312	0.962594	-0.306835	0.410897	0.583905	-
C50F7.10|C50F7.10|C50F7.10	0.0210582	0.933168	0.962522	-0.0104031	0.974573	0.987069	-
trp-2|R06B10.4|R06B10.4b	0.026197	0.933056	0.962446	0.0837026	0.840491	0.908185	-
lgc-14|T01H10.2|T01H10.2	0.0612359	0.93304	0.962446	0.840737	0.418495	0.59114	-
bath-23|Y49F6C.5|Y49F6C.5	-0.0385199	0.932615	0.962069	1.09899	0.0739287	0.1775	-
ZK430.7|ZK430.7|ZK430.7	0.0114901	0.93257	0.962061	-0.118795	0.498662	0.662218	-
Y53F4B.57|Y53F4B.57	0.139124	0.93234	0.962009	-1.51836	0.299418	0.472448	-
Y53F4B.53|Y53F4B.53	0.139124	0.932467	0.962009	-1.44764	0.324846	0.498333	-
C40A11.3|C40A11.3|C40A11.3	-0.0951066	0.932397	0.962009	-1.31235	0.314211	0.487698	-
itr-1|F33D4.2|F33D4.2h	-0.0200728	0.932472	0.962009	-0.443675	0.153632	0.297056	-
VM106R.1|VM106R.1|VM106R.1	0.0216312	0.932238	0.962009	-0.229913	0.495694	0.659607	-
hil-8|T05E8.2|T05E8.2	-0.0555855	0.932419	0.962009	-0.00533165	0.9956	0.997551	-
C35E7.5|C35E7.5|C35E7.5a	0.0382609	0.932481	0.962009	0.324988	0.576751	0.724979	-
T28A11.2|T28A11.2|T28A11.2a	-0.0215463	0.932415	0.962009	0.40033	0.221053	0.383827	-
C27D6.11|C27D6.11|C27D6.11	0.0139737	0.932244	0.962009	0.518856	0.0157859	0.0578801	-
clec-192|Y116A8A.1	0.0947576	0.932192	0.962009	2.06795	0.110763	0.236071	-
fbxa-175|C38D9.12	0.0254467	0.931951	0.961849	0.31495	0.419507	0.592161	-
Y53H1B.6|Y53H1B.6|Y53H1B.6	0.0640386	0.931938	0.961849	2.25406	0.045331	0.124105	-
M04F3.3|M04F3.3|M04F3.3	-0.0163766	0.931852	0.961826	0.434882	0.0820877	0.191015	-
Y61A9LA.3|Y61A9LA.3|Y61A9LA.3c	0.0100394	0.931664	0.961817	0.01991	0.897454	0.942115	-
R11D1.12|R11D1.12|R11D1.12a	-0.02373	0.931806	0.961817	0.46953	0.21208	0.372898	-
C04G2.5|C04G2.5|C04G2.5	0.0210973	0.931778	0.961817	0.530211	0.101038	0.22114	-
pqn-75|W03D2.1|W03D2.1c	0.023083	0.93178	0.961817	0.555811	0.111458	0.237175	-
fbxa-71|T20H9.3|T20H9.3	-0.0455586	0.931703	0.961817	1.20409	0.0793148	0.186597	-
C31H2.3|C31H2.3|C31H2.3	-0.0347847	0.931497	0.961692	0.0887586	0.866363	0.923506	-
C46H3.2|C46H3.2|C46H3.2b	-0.0298417	0.931344	0.961574	-0.327114	0.471587	0.638737	-
pqn-75|W03D2.1|W03D2.1a	0.0234023	0.931118	0.961379	0.573988	0.101474	0.221778	-
dyci-1|C17H12.1|C17H12.1	-0.017269	0.931054	0.961351	-0.519121	0.0456887	0.124801	-
F16B12.5|F16B12.5|F16B12.5	0.145441	0.93055	0.961097	-0.773348	0.708832	NA	-
nhr-40|T03G6.2|T03G6.2c	0.0226988	0.930505	0.961097	-0.277325	0.427921	0.599348	-
sma-4|R12B2.1|R12B2.1b	-0.0210029	0.930673	0.961097	-0.0467194	0.881736	0.932679	-
W09C5.8|W09C5.8|W09C5.8	-0.0164086	0.930665	0.961097	-0.0098207	0.96783	0.983747	-
C50D2.7|C50D2.7|C50D2.7	-0.0162556	0.93077	0.961097	-0.00147219	0.995148	0.997181	-
R04F11.2|R04F11.2|R04F11.2	-0.0170834	0.93076	0.961097	0.119642	0.637397	0.769988	-
T08B2.5|T08B2.5|T08B2.5e	-0.0369845	0.930651	0.961097	0.136335	0.808461	0.886672	-
D1007.18|D1007.18|D1007.18	-0.0335261	0.930752	0.961097	1.41769	0.00463514	0.0234203	-
F58F9.6|F58F9.6|F58F9.6	0.115764	0.930531	0.961097	1.81375	0.280364	NA	-
D1046.14|D1046.14	-0.119899	0.930426	0.961091	1.583	0.438433	0.609391	-
cpi-2|R01B10.1|R01B10.1b	-0.0152841	0.930368	0.961071	-0.0739186	0.745431	0.846419	-
T03G11.9|T03G11.9|T03G11.9	0.0293327	0.930172	0.960907	0.55875	0.210192	0.370555	-
F27D4.4|F27D4.4|F27D4.4b	0.0223459	0.930081	0.960852	0.13631	0.677122	0.799299	-
ubc-14|Y87G2A.9|Y87G2A.9	-0.0192462	0.929976	0.960782	0.0512396	0.856173	0.917637	-
wdr-5.2|K04G11.4|K04G11.4	0.022266	0.929963	0.960782	0.0614045	0.854441	0.916858	-
Y38F2AR.3|Y38F2AR.3|Y38F2AR.3	0.0177293	0.929921	0.960782	0.236376	0.362696	0.53745	-
srp-8|F20D6.3|F20D6.3	0.043222	0.929938	0.960782	0.75683	0.233309	0.399202	-
avr-14|B0207.12|B0207.12b	0.0153317	0.929441	0.960384	-0.343784	0.147338	0.288056	-
K09E4.3|K09E4.3|K09E4.3	0.0237272	0.929351	0.960384	0.196982	0.56823	0.718539	-
snf-10|Y32F6A.2|Y32F6A.2	-0.019889	0.929437	0.960384	0.342598	0.247199	0.415038	-
T09B4.3|T09B4.3|T09B4.3	-0.0276796	0.92938	0.960384	0.53533	0.210558	0.371014	-
let-363|B0261.2|B0261.2b	0.0145341	0.929222	0.960314	-0.54608	0.0105017	0.0430256	-
Y47D9A.1|Y47D9A.1|Y47D9A.1b	0.0305992	0.929111	0.960238	-0.56028	0.212199	0.373021	-
unc-26|JC8.10|JC8.10b	0.0242052	0.929101	0.960238	-0.313827	0.37707	0.552278	-
F35B12.10|F35B12.10|F35B12.10	0.0296769	0.929077	0.960238	-0.0159095	0.971667	0.985934	-
ttr-25|Y51A2D.10|Y51A2D.10	-0.0134606	0.928986	0.960225	-0.0812901	0.679135	0.80075	-
AH10.3|AH10.3|AH10.3	0.0702126	0.928932	0.960208	-0.712188	0.510733	0.671911	-
dhs-2|F55A12.4|F55A12.4b	-0.0337143	0.928872	0.960185	-1.40353	0.00672445	0.0307667	-
egl-45|C27D11.1|C27D11.1	-0.0156407	0.928772	0.960139	-0.491771	0.0299073	0.0912583	-
Y46G5A.7|Y46G5A.7|Y46G5A.7	-0.036498	0.928789	0.960139	0.21283	0.694968	0.812624	-
gon-2|T01H8.5|T01H8.5b	-0.0598401	0.928747	0.960139	1.30379	0.15358	0.297053	-
C35D10.3|C35D10.3|C35D10.3	0.0270951	0.928541	0.959998	0.889374	0.0236036	0.0771782	-
clec-263|F26F2.6|F26F2.6	-0.104488	0.92847	0.959964	0.31907	0.808607	0.886753	-
C32A3.5|C32A3.5	0.177236	0.928336	0.959865	-0.117112	0.96365	NA	-
let-363|B0261.2|B0261.2a	0.0176198	0.928277	0.959846	-0.612129	0.0175474	0.0623452	-
pat-3|ZK1058.2|ZK1058.2	0.0272615	0.92828	0.959846	-0.438443	0.265786	0.435985	-
F22E10.8|F22E10.8	0.20958	0.928256	0.959846	1.3259	0.664532	NA	-
srh-35|M02H5.11|M02H5.11	-0.090603	0.928195	0.959846	2.67025	0.0498738	0.133038	-
gld-2|ZC308.1|ZC308.1c	0.0328219	0.928048	0.959761	-0.295738	0.555882	0.707594	-
atp-4|T05H4.12|T05H4.12	0.0152258	0.927987	0.959737	0.0530496	0.807328	0.885667	-
C08F1.11|C08F1.11|C08F1.11	-0.133402	0.927837	0.959621	3.46112	0.0637649	NA	-
T26E3.7|T26E3.7|T26E3.7	0.045708	0.92777	0.95959	1.16293	0.0878369	0.200549	-
sre-6|F28H7.9|F28H7.9	0.0564778	0.927684	0.959539	0.111565	0.897015	0.942018	-
abts-1|F52B5.1|F52B5.1a	-0.0244987	0.927283	0.959176	-0.563979	0.106579	0.229461	-
T10B5.8|T10B5.8|T10B5.8	-0.0466778	0.927295	0.959176	-0.34272	0.604187	0.745788	-
Y46G5A.28|Y46G5A.28|Y46G5A.28	-0.176801	0.927214	0.95917	-3.38931	0.145732	0.285837	-
clec-62|F35C5.5|F35C5.5a	-0.0268704	0.927181	0.95917	0.0996942	0.793625	0.876095	-
Y37E11AL.2|Y37E11AL.2|Y37E11AL.2	-0.0255861	0.926998	0.959024	0.629651	0.0815859	0.190207	-
atx-2|D2045.1|D2045.1d	0.023875	0.926918	0.95898	-0.460058	0.173242	0.322567	-
F15E11.2|F15E11.2|F15E11.2	-0.079323	0.926725	0.95882	-0.267428	0.862733	0.921535	-
rgs-7|F56B6.2|F56B6.2f	-0.0236101	0.92651	0.958636	-0.0579104	0.865754	0.923297	-
Y95B8A.8|Y95B8A.8|Y95B8A.8	0.0325745	0.926285	0.958442	-0.244266	0.62129	0.758669	-
Y75B12A.1|Y75B12A.1	0.0156657	0.926195	0.958392	0.118778	0.593574	0.738145	-
end-1|F58E10.2|F58E10.2	-0.169036	0.926199	0.958392	1.18871	0.615777	NA	-
W02G9.5|W02G9.5|W02G9.5	-0.0323038	0.926059	0.958332	-0.945587	0.0511776	0.135427	-
kcnl-2|F08A10.1|F08A10.1b	-0.026793	0.926066	0.958332	-0.427381	0.287699	0.459872	-
syp-1|F26D2.2|F26D2.2	0.0135207	0.92589	0.958243	0.0594945	0.752318	0.851196	-
F46C3.2|F46C3.2|F46C3.2	-0.0369072	0.925897	0.958243	0.0986318	0.851134	0.914664	-
ZC204.17|ZC204.17|ZC204.17	0.116178	0.925905	0.958243	0.321363	0.823154	0.896496	-
F55G7.5|F55G7.5|F55G7.5	0.152019	0.925757	0.958206	0.214308	0.918894	NA	-
cyc-2.2|ZC116.2|ZC116.2	-0.0196516	0.925606	0.958089	0.313706	0.248345	0.416164	-
Y41C4A.12|Y41C4A.12|Y41C4A.12a	0.0244141	0.925551	0.958089	0.336326	0.320835	0.494258	-
R102.10|R102.10|R102.10	0.0175584	0.925601	0.958089	0.445186	0.072628	0.175269	-
T19D2.3|T19D2.3|T19D2.3	0.0288309	0.925507	0.958089	0.928944	0.0192934	0.066703	-
sri-44|K07E8.12	-0.126407	0.925158	0.95778	1.49931	0.413354	NA	-
lev-10|Y105E8A.7|Y105E8A.7a	0.0133493	0.925119	0.957778	-0.00508593	0.978383	0.988936	-
T06H11.11|T06H11.11	-0.176084	0.924956	0.957662	-0.3939	0.871663	NA	-
vps-4|Y34D9A.10|Y34D9A.10	0.0161783	0.924951	0.957662	0.00641148	0.977057	0.988337	-
lars-2|ZK524.3|ZK524.3c	-0.027641	0.924968	0.957662	0.20036	0.596623	0.740312	-
abts-1|F52B5.1|F52B5.1b	-0.0254762	0.924427	0.957346	-0.562723	0.107539	0.231162	-
cpt-1|Y46G5A.17|Y46G5A.17	0.0229286	0.924552	0.957346	-0.422388	0.177976	0.328663	-
K08E5.4|K08E5.4	-0.0674	0.924463	0.957346	-0.342981	0.724633	0.83333	-
K11D12.8|K11D12.8|K11D12.8	-0.0401898	0.924519	0.957346	0.195915	0.730586	0.836915	-
F15E6.3|F15E6.3|F15E6.3	-0.0459415	0.92449	0.957346	1.28065	0.040527	0.114466	-
K05F1.8|K05F1.8|K05F1.8	-0.0288306	0.924357	0.957339	0.881714	0.0245425	0.0793281	-
T20F10.5|T20F10.5|T20F10.5	-0.0247628	0.924271	0.957289	0.394827	0.288651	0.460734	-
B0303.3|B0303.3|B0303.3	0.0113406	0.92422	0.957275	-0.208483	0.176412	0.326635	-
B0294.1|B0294.1|B0294.1	0.0267212	0.924129	0.957219	0.135869	0.71083	0.823772	-
T25B2.4|T25B2.4|T25B2.4	-0.0810266	0.92391	0.957031	-1.0982	0.404454	0.577435	-
ser-5|F16D3.7|F16D3.7	-0.0266969	0.923738	0.956892	-0.0472346	0.906566	0.947365	-
hlh-1|B0304.1|B0304.1c	0.0294469	0.923599	0.956786	-0.0811319	0.844158	0.910397	-
nhr-21|F21D12.1|F21D12.1a	0.0356139	0.923479	0.956702	-0.26331	0.584581	0.731076	-
hars-1|T11G6.1|T11G6.1a	0.0101898	0.923363	0.956619	-0.178162	0.193791	0.349836	-
B0379.1|B0379.1	-0.0154889	0.923327	0.956619	-0.0588985	0.781496	0.868711	-
F10E7.1|F10E7.1|F10E7.1	0.0985667	0.92324	0.956569	0.346776	0.793069	0.875793	-
Y54E10A.17|Y54E10A.17|Y54E10A.17	-0.0205186	0.923162	0.956543	-0.26347	0.338472	0.512531	-
C28H8.7|C28H8.7|C28H8.7	0.0907637	0.923177	0.956543	0.470857	0.720236	0.830375	-
pat-12|T17H7.4|T17H7.4g	0.0255063	0.92306	0.9565	-0.278742	0.416404	0.589188	-
klp-7|K11D9.1|K11D9.1b	-0.0150424	0.922954	0.956429	-0.182269	0.365563	0.540393	-
nhr-148|C03G6.10|C03G6.10	0.0370312	0.92286	0.95637	-0.321441	0.541151	0.69643	-
gly-5|Y39E4B.12|Y39E4B.12a	0.0164865	0.922798	0.956344	-0.335645	0.129783	0.263116	-
C03H12.2|C03H12.2	0.136773	0.92269	0.956291	-0.730228	0.718051	0.829077	-
T05H4.6a|T05H4.6|T05H4.6	-0.0158765	0.922708	0.956291	-0.495978	0.0191929	0.0664399	-
H20E11.2|H20E11.2|H20E11.2	0.0466648	0.922669	0.956291	-0.214407	0.730252	0.836771	-
math-32|F59H6.4|F59H6.4	-0.0378292	0.92256	0.956253	1.36442	0.00656471	0.0301935	-
F35H12.6|F35H12.6|F35H12.6	-0.0422243	0.922504	0.956234	-0.698766	0.220906	0.383653	-
pqn-85|Y43H11AL.3|Y43H11AL.3	0.0154165	0.922479	0.956234	-0.509362	0.0137702	0.0524489	-
bath-47|T07H3.1|T07H3.1	-0.079235	0.922452	0.956234	2.33161	0.0308189	0.0933317	-
F15E11.1|F15E11.1|F15E11.1	-0.035334	0.922299	0.956138	-0.537295	0.250556	0.418623	-
F15E11.14|F15E11.14|F15E11.14	-0.035334	0.922299	0.956138	-0.537295	0.250556	0.418623	-
cit-1.1|F44B9.4|F44B9.4c	-0.0333692	0.922176	0.956116	-0.914692	0.0485086	0.130531	-
ape-1|F46F3.4|F46F3.4c	0.0254606	0.922094	0.956116	-0.835709	0.0141772	0.0535914	-
D2096.7|D2096.7|D2096.7a	-0.0309305	0.922203	0.956116	-0.363384	0.382243	0.55673	-
Y17G7B.4|Y17G7B.4|Y17G7B.4	0.0160751	0.9222	0.956116	-0.040849	0.847612	0.912598	-
fbxa-92|Y119D3B.20|Y119D3B.20	0.0429211	0.922182	0.956116	0.917066	0.113925	0.240817	-
F31E9.8|F31E9.8	0.18372	0.922019	0.956116	1.37326	0.574518	NA	-
hot-1|F43D2.4|F43D2.4a	-0.0205075	0.921489	0.955609	0.00154941	0.995579	0.997551	-
T08G5.15|T08G5.15|T08G5.15	0.0683541	0.921381	0.955536	0.831972	0.33375	0.507242	-
srg-62|C24B9.12|C24B9.12	0.13968	0.921196	0.955382	-0.294574	0.866604	NA	-
F53F4.10|F53F4.10|F53F4.10	0.0160717	0.921173	0.955382	-8.70639e-05	0.999669	0.999832	-
srw-135|K12D9.11	0.104576	0.92094	0.955194	-0.147409	0.897264	0.942037	-
C45G9.13|C45G9.13|C45G9.13	0.0195321	0.92088	0.955171	0.0670309	0.794912	0.876948	-
Y73F8A.24|Y73F8A.24|Y73F8A.24a	-0.017116	0.920774	0.9551	0.0445025	0.841271	0.908562	-
F28E10.5|F28E10.5|F28E10.5	-0.0524103	0.920683	0.955044	0.243964	0.740551	0.84355	-
F35E12.5|F35E12.5|F35E12.5	0.0445718	0.920603	0.955	0.604236	0.29574	0.468724	-
imb-1|F28B3.8|F28B3.8	-0.0253092	0.920284	0.954708	-0.0543543	0.86859	0.924984	-
C08F8.9|C08F8.9|C08F8.9	0.0244904	0.920129	0.954594	0.168647	0.592168	0.736959	-
F37F2.2|F37F2.2|F37F2.2	0.0239232	0.920137	0.954594	0.180178	0.558092	0.709523	-
sru-21|C08F11.4|C08F11.4	0.0925918	0.919893	0.954418	3.89706	0.00416208	0.0217344	N2
Y19D2B.2|Y19D2B.2|Y19D2B.2	-0.0869554	0.919841	0.954415	-0.959563	0.448291	0.617409	-
M03B6.4|M03B6.4|M03B6.4a	0.0239679	0.919704	0.954415	-0.654492	0.042257	0.118168	-
dnj-25|W07A8.3|W07A8.3a	0.0318093	0.919709	0.954415	-0.578228	0.158747	0.303312	-
C07C7.1|C07C7.1|C07C7.1	-0.0701582	0.919769	0.954415	-0.314623	0.747278	0.847541	-
sma-9|T05A10.1|T05A10.1e	-0.0231781	0.919838	0.954415	-0.12281	0.686485	0.806008	-
tag-310|R10E4.2|R10E4.2i	-0.0513891	0.919852	0.954415	-0.0967176	0.895976	0.941249	-
C01G6.10|C01G6.10	0.0443151	0.919793	0.954415	-0.0640392	0.913531	0.951673	-
F55F10.3|F55F10.3|F55F10.3	0.0282504	0.919691	0.954415	1.09535	0.00310086	0.0175204	-
Y73F8A.22|Y73F8A.22|Y73F8A.22	-0.121578	0.919504	0.954364	0.637034	0.645368	0.775173	-
gob-1|H13N06.3|H13N06.3b	0.0357169	0.919365	0.954292	-0.394929	0.395504	0.569252	-
cdc-42|R07G3.1|R07G3.1	-0.019897	0.919397	0.954292	-0.333795	0.190325	0.345512	-
tap-1|C44H4.5|C44H4.5	0.0250806	0.919378	0.954292	-0.263313	0.416073	0.588886	-
sre-20|ZC455.7|ZC455.7	0.123487	0.919234	0.954239	0.645675	0.690455	0.809004	-
K03B8.11|K03B8.11|K03B8.11	-0.103975	0.919228	0.954239	1.8379	0.0685781	0.167991	-
K12B6.9|K12B6.9|K12B6.9	-0.0360468	0.918958	0.954071	-0.591973	0.20074	0.359287	-
pmt-1|ZK622.3|ZK622.3c	0.0229421	0.918974	0.954071	-0.480305	0.0990897	0.218172	-
cgef-1|C14A11.3|C14A11.3a	0.0320578	0.918998	0.954071	-0.418834	0.326294	0.499593	-
F14D7.6|F14D7.6|F14D7.6c	0.0364933	0.918727	0.953907	0.632658	0.173734	0.323215	-
R05G6.10|R05G6.10|R05G6.10	0.0557098	0.918644	0.953859	0.152265	0.82958	0.900177	-
atx-2|D2045.1|D2045.1c	0.0270017	0.918569	0.953819	-0.467906	0.172151	0.321267	-
C01G6.4|C01G6.4|C01G6.4	0.0316316	0.918379	0.953689	-0.178228	0.656486	0.783554	-
E04F6.9|E04F6.9|E04F6.9	-0.0174736	0.918392	0.953689	0.0328999	0.881586	0.932618	-
Y71G12A.2|Y71G12A.2|Y71G12A.2a	0.0296582	0.918406	0.953689	0.168294	0.655521	0.783069	-
F52C6.13|F52C6.13|F52C6.13	-0.0881341	0.918314	0.953689	0.212151	0.854452	0.916858	-
C45G9.4|C45G9.4|C45G9.4	-0.0157423	0.918385	0.953689	0.239089	0.231194	0.396636	-
Y51H7BR.5|Y51H7BR.5|Y51H7BR.5	-0.13745	0.91825	0.953689	0.836912	0.623941	NA	-
sru-32|C50C10.5	0.167916	0.918101	0.953605	0.277743	0.890755	NA	-
F27C1.13|F27C1.13|F27C1.13	0.151548	0.918055	0.953596	1.79659	0.356576	NA	-
rme-1|W06H8.1|W06H8.1e	-0.0302031	0.917791	0.953361	-0.454725	0.232087	0.397805	-
Y47H9C.1|Y47H9C.1|Y47H9C.1	0.0751988	0.917723	0.953328	1.6022	0.11407	0.24102	-
Y105C5A.15|Y105C5A.15|Y105C5A.15b	-0.035304	0.917671	0.953313	0.135802	0.764872	0.857928	-
Y50D7A.2|Y50D7A.2|Y50D7A.2	0.0220955	0.91763	0.95331	0.0217068	0.939659	0.967664	-
T16G12.9|T16G12.9|T16G12.9b	0.0567949	0.917496	0.953283	-0.777255	0.329056	0.502472	-
lin-10|C09H6.2|C09H6.2b	0.0197596	0.917518	0.953283	-0.516187	0.0412991	0.116112	-
sma-4|R12B2.1|R12B2.1a	-0.0257992	0.917443	0.953283	-0.0732213	0.820304	0.894614	-
C08A9.10|C08A9.10|C08A9.10	-0.018659	0.917547	0.953283	0.0660964	0.776348	0.865975	-
srt-23|Y55F3C.2|Y55F3C.2	0.21327	0.917567	0.953283	1.81322	0.50793	NA	-
elt-3|K02B9.4|K02B9.4b	-0.0293496	0.917358	0.95326	0.232132	0.526631	0.684995	-
F59C6.5|F59C6.5|F59C6.5	0.0141407	0.917248	0.953184	-0.196339	0.264499	0.434515	-
T28B8.1|T28B8.1|T28B8.1	0.0293606	0.917197	0.95317	-0.062503	0.86451	0.922452	-
bcat-1|K02A4.1|K02A4.1	0.0259097	0.917132	0.953141	-0.284807	0.378186	0.553153	-
ras-2|F17C8.4|F17C8.4	-0.0134166	0.917062	0.953107	0.00740839	0.964618	0.981772	-
fbxa-93|W09G3.5	0.0239382	0.916906	0.952992	0.457889	0.124615	0.255617	-
T28A11.5|T28A11.5|T28A11.5	-0.0743686	0.916914	0.952992	1.84495	0.0706113	0.171737	-
F37A4.6|F37A4.6|F37A4.6	0.0489222	0.916781	0.952973	-0.333336	0.602727	0.744772	-
Y39F10C.1|Y39F10C.1|Y39F10C.1	-0.0196925	0.916821	0.952973	0.620059	0.017961	0.0633444	-
Y26D4A.8|Y26D4A.8|Y26D4A.8	0.0695283	0.916806	0.952973	0.762293	0.38074	0.555666	-
Y53G8AR.8|Y53G8AR.8|Y53G8AR.8	-0.0217335	0.916571	0.952864	0.0549021	0.838111	0.906427	-
clec-62|F35C5.5|F35C5.5b	-0.0318422	0.916557	0.952864	0.117235	0.766992	0.859568	-
twk-43|F32H5.7|F32H5.7	-0.0189288	0.916604	0.952864	0.19536	0.41697	0.589699	-
npp-10|ZK328.5|ZK328.5c	0.0293223	0.916478	0.952849	-0.294874	0.416027	0.588875	-
sra-39|T21H8.4|T21H8.4	-0.192797	0.916395	0.952802	0.348716	0.885806	NA	-
Y37D8A.2|Y37D8A.2|Y37D8A.2	0.010844	0.916223	0.952662	-0.137655	0.307299	0.480924	-
fbxa-91|Y119D3B.18|Y119D3B.18	0.0472366	0.916076	0.952547	1.26854	0.0305598	0.0928221	-
hlh-17|F38C2.2|F38C2.2	-0.053277	0.916001	0.952508	0.918006	0.147785	0.288809	-
nhr-275|Y5H2A.2|Y5H2A.2	-0.0442147	0.915904	0.952468	-0.0817136	0.878675	0.931047	-
ttr-41|F10G7.11|F10G7.11	0.0171589	0.915925	0.952468	0.0260697	0.901392	0.944569	-
C18D11.8|C18D11.8	-0.0323022	0.915784	0.952435	-0.00703474	0.98576	0.992802	-
T21C9.11|T21C9.11|T21C9.11	-0.0433693	0.915819	0.952435	0.147986	0.783084	0.869845	-
F43C9.2|F43C9.2|F43C9.2	0.0202615	0.915751	0.952435	0.371305	0.133569	0.268682	-
ubc-24|F49E12.4|F49E12.4	0.024647	0.915744	0.952435	0.894332	0.00332982	0.0184904	-
hars-1|T11G6.1|T11G6.1b	0.0116102	0.915558	0.952319	-0.178059	0.210004	0.370331	-
rgs-7|F56B6.2|F56B6.2b	-0.0254698	0.915521	0.952319	-0.0928953	0.770211	0.861946	-
Y46G5A.15|Y46G5A.15|Y46G5A.15	0.0274801	0.915228	0.952054	-0.140965	0.685034	0.805039	-
ape-1|F46F3.4|F46F3.4d	0.0279354	0.915024	0.952016	-0.854658	0.0125987	0.0492072	-
hrg-1|R02E12.6|R02E12.6	0.0346917	0.915091	0.952016	-0.723076	0.085217	0.196174	-
F30F8.9|F30F8.9|F30F8.9b	-0.021784	0.91508	0.952016	-0.629611	0.0177193	0.0627828	-
pat-12|T17H7.4|T17H7.4e	0.0342454	0.915155	0.952016	-0.302904	0.4733	0.640017	-
ugt-29|Y49C4A.8|Y49C4A.8b	0.0309525	0.915009	0.952016	-0.259567	0.491342	0.655701	-
F49E7.2|F49E7.2|F49E7.2	-0.0264867	0.915019	0.952016	-0.214505	0.501844	0.664658	-
C43C3.4|C43C3.4|C43C3.4	-0.0417622	0.915102	0.952016	0.0831981	0.871299	0.926473	-
F54D11.4|F54D11.4|F54D11.4	0.0148226	0.914934	0.952016	0.097899	0.590396	0.735719	-
T27E7.1|T27E7.1|T27E7.1	-0.0583734	0.915017	0.952016	0.211255	0.764761	0.857882	-
T11G6.7|T11G6.7|T11G6.7	0.0452921	0.915139	0.952016	0.859122	0.147172	0.287809	-
C39E9.8|C39E9.8|C39E9.8a	0.023249	0.914654	0.951883	-0.307978	0.272858	0.444166	-
nhr-186|F47C10.3|F47C10.3	-0.0586891	0.914613	0.951879	0.2997	0.678377	0.800164	-
gap-2|ZK899.8|ZK899.8f	-0.0306612	0.914511	0.951811	-0.690944	0.066096	0.16351	-
Y73E7A.3|Y73E7A.3|Y73E7A.3b	0.0349689	0.914509	0.951811	-0.431615	0.311598	0.485549	-
C01G10.8|C01G10.8|C01G10.8	0.0103434	0.914442	0.951811	-0.280888	0.0240808	0.0782688	-
tag-264|B0511.8|B0511.8	0.0209102	0.914454	0.951811	-0.0110309	0.965	0.981971	-
ttr-5|C40H1.5|C40H1.5	-0.0216562	0.914294	0.951741	0.127705	0.622976	0.760021	-
T05C1.4|T05C1.4|T05C1.4a	-0.018133	0.914212	0.951694	0.0753736	0.733928	0.838966	-
Y59A8B.25|Y59A8B.25|Y59A8B.25	0.0260222	0.9142	0.951694	0.317068	0.30903	0.482863	-
gst-6|F11G11.3|F11G11.3	-0.0213675	0.913835	0.951379	0.396475	0.122168	0.251968	-
F19B6.1|F19B6.1|F19B6.1c	-0.0416317	0.913735	0.951314	-0.807164	0.108852	0.233147	-
T05A7.6|T05A7.6|T05A7.6	0.0259766	0.913588	0.9512	0.54996	0.0769082	0.182775	-
Y51H7C.5|Y51H7C.5|Y51H7C.5	0.0101956	0.913525	0.951173	-0.276903	0.0238689	0.0777245	-
acs-6|ZK1127.2|ZK1127.2	0.0223521	0.913515	0.951173	0.393634	0.142099	0.280686	-
ZK662.8|ZK662.8	-0.0617445	0.913407	0.951127	0.180544	0.804453	0.883501	-
F57B1.6|F57B1.6|F57B1.6b	0.0682944	0.913293	0.951077	-0.607859	0.47185	0.639019	-
C10G8.8|C10G8.8|C10G8.8b	0.0200064	0.913321	0.951077	-0.295408	0.215303	0.37685	-
mel-11|C06C3.1|C06C3.1a	0.0331946	0.913101	0.950925	-0.444714	0.260805	0.43101	-
fbxa-36|Y119D3A.4|Y119D3A.4	0.0763204	0.912838	0.95069	0.386	0.685105	0.805082	-
F40F12.7|F40F12.7|F40F12.7	-0.0306685	0.912824	0.95069	0.596458	0.0998955	0.219364	-
C54D2.11|C54D2.11	0.126089	0.912763	0.950689	-0.728056	0.638401	0.770648	-
ten-1|R13F6.4|R13F6.4a	0.0376438	0.912706	0.950669	-0.286194	0.541747	0.697015	-
str-177|T18H9.4|T18H9.4	-0.275423	0.912569	0.950573	-1.98352	0.550397	NA	-
H09I01.1|H09I01.1|H09I01.1	0.0428918	0.912577	0.950573	0.874922	0.0694694	0.169634	-
clec-219|W02D7.10|W02D7.10	-0.0908393	0.912482	0.950552	0.764024	0.404174	0.577365	-
Y46C8AL.11|Y46C8AL.11|Y46C8AL.11	0.202421	0.912448	0.950552	2.09053	0.369901	NA	-
Y57A10A.27|Y57A10A.27|Y57A10A.27	-0.0141098	0.912379	0.950521	-0.169897	0.308318	0.48215	-
F23D12.1|F23D12.1|F23D12.1	0.101699	0.912334	0.950514	-1.95236	0.11736	0.245895	-
rme-1|W06H8.1|W06H8.1b	-0.0237665	0.912226	0.95044	-0.261957	0.348952	0.523343	-
T02D1.7|T02D1.7|T02D1.7	0.156254	0.912057	0.950366	-0.253018	0.883822	0.934014	-
tag-310|R10E4.2|R10E4.2b	0.0539597	0.912112	0.950366	-0.0981815	0.88952	0.937356	-
F14D2.8|F14D2.8|F14D2.8	-0.030315	0.912118	0.950366	0.275366	0.437268	0.608411	-
R02F11.3|R02F11.3|R02F11.3b	0.0362957	0.91187	0.950224	-0.159728	0.719076	0.829615	-
ZC410.5|ZC410.5|ZC410.5b	0.0129672	0.911851	0.950224	-0.0608731	0.690944	0.809423	-
F21D5.7|F21D5.7|F21D5.7	-0.0113347	0.911769	0.950196	-0.536961	5.35131e-05	0.000913595	-
snt-5|R12A1.2|R12A1.2	0.0227305	0.911628	0.950154	-0.244365	0.367019	0.541859	-
T07A9.14|T07A9.14|T07A9.14	-0.0205575	0.911671	0.950154	-0.106773	0.656022	0.783399	-
T06H11.2|T06H11.2|T06H11.2	0.147142	0.911691	0.950154	0.378047	0.830367	0.900854	-
bath-26|T07H3.6|T07H3.6	0.0632336	0.911641	0.950154	0.452421	0.552916	0.705943	-
R148.7|R148.7|R148.7	-0.0200044	0.91167	0.950154	0.5721	0.014692	0.0550203	-
T07F10.5|T07F10.5|T07F10.5	-0.0131837	0.911456	0.950103	-0.111828	0.471472	0.638687	-
C10C6.9|C10C6.9	0.024287	0.911386	0.950069	0.0871123	0.756914	0.853646	-
skr-1|F46A9.5|F46A9.5	0.0182162	0.91134	0.950059	-0.334471	0.114069	0.24102	-
F33D11.6|F33D11.6|F33D11.6	0.152111	0.911252	0.950007	-0.400343	0.819639	NA	-
nekl-2|ZC581.1|ZC581.1	0.0235129	0.911121	0.949909	-0.418047	0.136765	0.27314	-
T08D2.4|T08D2.4|T08D2.4	0.0745359	0.911073	0.949897	-0.482892	0.598342	0.741744	-
W04E12.9|W04E12.9|W04E12.9	-0.109527	0.911011	0.949872	0.91052	0.475065	0.641642	-
let-60|ZK792.6|ZK792.6	-0.0405875	0.910759	0.949682	-0.304029	0.519588	0.679317	-
M02B1.4|M02B1.4|M02B1.4	-0.0218235	0.910714	0.949682	-0.145529	0.571842	0.721397	-
W06D4.2|W06D4.2|W06D4.2	-0.0176535	0.910785	0.949682	0.064765	0.75586	0.853085	-
C28C12.11|C28C12.11|C28C12.11b	0.0199145	0.910687	0.949682	0.481808	0.0387499	0.110592	-
T06E4.7|T06E4.7|T06E4.7	0.0636245	0.910792	0.949682	0.784378	0.392095	0.56631	-
pmt-1|ZK622.3|ZK622.3a	0.0253743	0.910471	0.949543	-0.474979	0.103544	0.224999	-
prx-3|C15H9.8|C15H9.8b	-0.0258118	0.910446	0.949543	-0.374993	0.215836	0.377443	-
Y48G1BL.4|Y48G1BL.4|Y48G1BL.4	-0.0304434	0.910473	0.949543	0.0499938	0.884025	0.934014	-
oac-6|C31A11.5|C31A11.5	0.0283366	0.910398	0.949543	1.13526	0.00130223	0.00932859	-
F53E4.1|F53E4.1|F53E4.1a	-0.0270424	0.910275	0.949497	-0.62431	0.0478414	0.129176	-
fip-4|F41E6.10|F41E6.10	0.0886194	0.91028	0.949497	0.70459	0.515595	0.675844	-
spas-1|C24B5.2|C24B5.2b	0.0334857	0.909815	0.949103	-0.610096	0.122661	0.252792	-
R07E3.1|R07E3.1|R07E3.1a	-0.0149427	0.909828	0.949103	-0.307023	0.0742358	0.178028	-
Y37E11B.10|Y37E11B.10|Y37E11B.10a	0.0157662	0.909586	0.948944	0.36429	0.0456315	0.124705	-
C08F11.10|C08F11.10|C08F11.10	-0.0244254	0.909601	0.948944	0.453927	0.103508	0.224942	-
Y48A6B.6|Y48A6B.6|Y48A6B.6a	0.0288833	0.909594	0.948944	0.677287	0.0516613	0.136456	-
F41D9.2|F41D9.2|F41D9.2b	-0.0300901	0.909453	0.948942	0.185858	0.591728	0.73664	-
rga-4|Y75B7AL.4|Y75B7AL.4a	-0.0260888	0.909488	0.948942	0.317929	0.290635	0.462756	-
F41D3.7|F41D3.7|F41D3.7	0.147059	0.909421	0.948942	0.641572	0.715957	0.827414	-
C01F1.3|C01F1.3|C01F1.3a	-0.0316176	0.909354	0.948919	-1.177	0.00115923	0.00855834	-
M02A10.1|M02A10.1|M02A10.1	0.0939346	0.909255	0.948854	0.312284	0.763852	0.857411	-
F47G9.1|F47G9.1|F47G9.1	0.0186121	0.909192	0.948828	-0.420484	0.047148	0.127725	-
T26G10.6|T26G10.6	-0.0523134	0.909065	0.948767	-0.400377	0.527548	0.685432	-
cyk-3|ZK328.1|ZK328.1b	0.0187995	0.908975	0.948767	-0.317197	0.141679	0.280399	-
Y82E9BR.1|Y82E9BR.1|Y82E9BR.1	0.0490464	0.909097	0.948767	-0.144511	0.821655	0.895737	-
mtx-2|ZC97.1|ZC97.1b	-0.0170608	0.90903	0.948767	-0.0866848	0.65307	0.781435	-
Y60A3A.21|Y60A3A.21|Y60A3A.21c	-0.030493	0.909086	0.948767	0.445057	0.195175	0.351746	-
F43C11.1|F43C11.1|F43C11.1	0.120807	0.908893	0.948748	-0.0639944	0.957491	0.978226	-
npr-10|C53C7.1|C53C7.1a	-0.0453358	0.908741	0.948627	-0.427763	0.425979	0.597866	-
W01C8.5|W01C8.5|W01C8.5b	-0.0240616	0.908545	0.948462	-0.462813	0.0902787	0.204431	-
gpr-2|C38C10.4|C38C10.4	-0.0103417	0.908462	0.948418	-0.249639	0.0357272	0.104216	-
F49H6.13|F49H6.13|F49H6.13	-0.160765	0.908466	0.948418	1.06393	0.637624	0.770115	-
T16G12.9|T16G12.9|T16G12.9c	0.0626701	0.908241	0.948267	-0.756225	0.338308	0.512423	-
sre-54|C50E10.6|C50E10.6	0.14707	0.908191	0.948267	0.380328	0.836164	0.905238	-
Y50E8A.19|Y50E8A.19	0.158199	0.908247	0.948267	2.65648	0.197177	0.354266	-
srg-15|C34C6.1|C34C6.1	0.101371	0.908056	0.948217	-0.60727	0.647515	0.777088	-
flp-16|F15D4.8|F15D4.8	-0.0216641	0.908032	0.948217	0.0740976	0.764232	0.85772	-
C40A11.8|C40A11.8|C40A11.8	0.0449379	0.908088	0.948217	1.15874	0.0333726	0.0989999	-
fat-1|Y67H2A.8|Y67H2A.8	0.0184119	0.907961	0.9482	-0.397621	0.0534087	0.139972	-
C05D2.3|C05D2.3|C05D2.3	0.0250367	0.907927	0.9482	0.828132	0.00358591	0.0195409	-
Y17G7B.17|Y17G7B.17|Y17G7B.17	-0.0162661	0.907779	0.94819	-0.2039	0.266579	0.436872	-
stim-1|Y55B1BM.1|Y55B1BM.1a	0.0177496	0.907759	0.94819	0.0443254	0.823628	0.896772	-
C05D2.11|C05D2.11	-0.0265049	0.907876	0.94819	0.20996	0.491705	0.655883	-
T19D2.1|T19D2.1|T19D2.1	0.0408151	0.907856	0.94819	0.452299	0.327892	0.501288	-
Y75B8A.33|Y75B8A.33|Y75B8A.33	0.0714867	0.907849	0.94819	1.26879	0.118723	0.247787	-
F28C6.9|F28C6.9|F28C6.9a	0.0687387	0.907811	0.94819	1.77268	0.0555674	0.143953	-
Y82E9BR.14|Y82E9BR.14|Y82E9BR.14a	-0.011753	0.907393	0.947918	-0.322115	0.0146628	0.0549446	-
F43C1.1|F43C1.1|F43C1.1	0.0470537	0.907331	0.947892	0.934585	0.107867	0.231623	-
dpy-10|T14B4.7|T14B4.7b	-0.0446367	0.907194	0.947787	-1.41504	0.00522353	0.025487	-
apy-1|F08C6.6|F08C6.6	0.018034	0.90708	0.947707	-0.212591	0.287901	0.459995	-
nspd-11|ZK337.6	-0.0278056	0.906987	0.947707	0.151081	0.618204	0.756632	-
F55C12.4|F55C12.4|F55C12.4	-0.0267118	0.907002	0.947707	0.374197	0.217916	0.379887	-
C55A6.3|C55A6.3|C55A6.3	0.0164339	0.907053	0.947707	0.412961	0.0271234	0.0850265	-
H05L14.1|H05L14.1|H05L14.1	-0.0275831	0.907075	0.947707	0.567734	0.0643675	0.160204	-
R09A1.3|R09A1.3|R09A1.3	-0.0594332	0.907017	0.947707	1.35328	0.0376787	0.108426	-
C24D10.1|C24D10.1|C24D10.1	0.0257678	0.906856	0.947706	0.435654	0.133935	0.269164	-
rme-1|W06H8.1|W06H8.1f	-0.0342605	0.906744	0.947704	-0.468742	0.215304	0.37685	-
srh-16|F55C5.9|F55C5.9	0.0830174	0.906767	0.947704	-0.166774	0.869566	0.92561	-
srv-6|C52B9.5|C52B9.5	-0.0915834	0.906787	0.947704	-0.000805693	0.999458	0.999728	-
ZK856.4|ZK856.4|ZK856.4	0.0532364	0.906817	0.947704	0.458217	0.445788	0.615532	-
W01B6.5|W01B6.5|W01B6.5	0.0352995	0.906608	0.94764	1.36274	0.000510047	0.00468476	-
Y57E12B.4|Y57E12B.4|Y57E12B.4	-0.075756	0.906556	0.947625	0.566519	0.519853	0.679465	-
lips-2|C04B4.3|C04B4.3	-0.196408	0.906478	0.947603	-0.569882	0.788239	NA	-
F21H12.3|F21H12.3|F21H12.3	0.0587147	0.906498	0.947603	0.867367	0.139483	0.276944	-
Y66D12A.29|Y66D12A.29	-0.100854	0.906479	0.947603	1.3749	0.253678	0.422677	-
let-526|C01G8.9|C01G8.9a	-0.0266981	0.906382	0.947598	-0.408147	0.169495	0.317834	-
egl-13|T22B7.1|T22B7.1a	0.0444056	0.906368	0.947598	0.295763	0.555661	0.707532	-
pho-4|T16D1.2|T16D1.2	0.0261387	0.906351	0.947598	0.476468	0.101093	0.221203	-
F54H12.7|F54H12.7|F54H12.7	0.0291548	0.906356	0.947598	0.719428	0.0245678	0.0793995	-
K09E3.2|K09E3.2|K09E3.2	0.267555	0.906249	0.947598	1.20967	0.684442	NA	-
Y54E5A.8|Y54E5A.8|Y54E5A.8b	-0.0273788	0.906036	0.94743	0.420248	0.164106	0.310793	-
sra-37|T21H8.2|T21H8.2	0.0489325	0.906006	0.94743	0.718009	0.219559	0.382289	-
nhr-240|Y60A3A.15	0.0592364	0.905861	0.947325	0.0464718	0.940814	0.968322	-
T19D7.7|T19D7.7|T19D7.7	0.0489588	0.905838	0.947325	0.109185	0.844109	0.910397	-
Y74C10AL.2|Y74C10AL.2|Y74C10AL.2	-0.0225858	0.90564	0.947243	-0.561597	0.0230885	0.0760439	-
ent-2|K09A9.3|K09A9.3	-0.0374245	0.905449	0.947243	-0.547748	0.180961	0.332374	-
pmt-1|ZK622.3|ZK622.3b	0.026689	0.905484	0.947243	-0.471592	0.10518	0.227426	-
F35H12.4|F35H12.4|F35H12.4	0.0135211	0.905687	0.947243	-0.130441	0.388698	0.563022	-
Y113G7A.13|Y113G7A.13|Y113G7A.13	-0.0536308	0.905708	0.947243	-0.071065	0.906586	0.947365	-
F59A1.6|F59A1.6|F59A1.6	-0.243994	0.905276	0.947243	-0.0506184	0.984035	NA	-
C39H7.1|C39H7.1|C39H7.1	0.0140199	0.905645	0.947243	0.0332021	0.828536	0.899521	-
clec-17|E03H4.10|E03H4.10	-0.057351	0.905454	0.947243	0.375941	0.650005	0.779098	-
srt-45|M162.3|M162.3	-0.161496	0.90539	0.947243	0.44818	0.798255	NA	-
arrd-24|F48F7.7|F48F7.7	-0.0921399	0.905565	0.947243	0.619863	0.5651	0.715615	-
scl-26|C50E3.10|C50E3.10	0.177188	0.905539	0.947243	1.35517	0.43357	0.60482	-
M03B6.5|M03B6.5|M03B6.5	-0.0640502	0.905562	0.947243	1.57298	0.0225991	0.0748411	-
srx-107|F40H7.10	0.191524	0.905448	0.947243	1.71876	0.404872	NA	-
Y57G11C.30|Y57G11C.30	0.116391	0.90511	0.947121	0.216412	0.853636	0.91655	-
Y105E8A.10|Y105E8A.10|Y105E8A.10a	-0.0160256	0.905018	0.947063	-0.135147	0.438681	0.609478	-
tag-333|C48G7.3|C48G7.3e	0.0353978	0.904921	0.947001	-0.61371	0.117393	0.245923	-
Y37D8A.12|Y37D8A.12|Y37D8A.12b	0.0645528	0.904914	0.947001	0.0849354	0.912561	0.951239	-
W03C9.8|W03C9.8|W03C9.8	0.0313264	0.904721	0.94687	0.861319	0.011028	0.0446407	-
fbxa-188|F47H4.8|F47H4.8	0.0535554	0.90461	0.946792	-0.476287	0.42939	0.600789	-
ZK1067.2|ZK1067.2|ZK1067.2	-0.028847	0.904354	0.946616	0.201933	0.518151	0.678216	-
M70.3|M70.3|M70.3a	-0.0241805	0.904346	0.946616	0.202292	0.440883	0.611291	-
F22B8.2|F22B8.2	0.173963	0.904405	0.946616	0.404205	0.796125	0.877734	-
Y45F10D.10|Y45F10D.10|Y45F10D.10b	0.0235944	0.90422	0.946616	0.497993	0.0504849	0.134245	-
C04G2.10|C04G2.10|C04G2.10a	0.0186758	0.904382	0.946616	0.525281	0.0116588	0.0464386	-
C26C6.6|C26C6.6|C26C6.6	-0.0283994	0.904288	0.946616	0.767221	0.0138251	0.0526172	-
B0464.2|B0464.2|B0464.2a	-0.0263923	0.904102	0.94656	-0.236002	0.404537	0.577477	-
unc-49|T21C12.1|T21C12.1h	0.0313708	0.904129	0.94656	0.0979716	0.779962	0.867752	-
eif-3.C|T23D8.4|T23D8.4	0.0259825	0.903931	0.94643	-0.559658	0.0443679	0.122301	-
C10C6.7|C10C6.7|C10C6.7a	-0.0390384	0.90383	0.946363	-0.0224941	0.958395	0.978658	-
tag-310|R10E4.2|R10E4.2g	-0.06683	0.903757	0.946326	-0.0993569	0.901408	0.944569	-
Y61A9LA.3|Y61A9LA.3|Y61A9LA.3a	0.0136725	0.903698	0.946303	-0.0216354	0.884434	0.934218	-
M70.3|M70.3|M70.3b	-0.0248741	0.903603	0.946242	0.2277	0.394873	0.568744	-
tag-262|Y54H5A.3|Y54H5A.3	-0.0204725	0.903515	0.946196	0.108811	0.6176	0.756256	-
rps-8|F42C5.8|F42C5.8	0.028026	0.903522	0.946196	0.225231	0.450539	0.619517	-
K09H11.11|K09H11.11|K09H11.11	0.069884	0.903322	0.946096	1.21261	0.143293	0.28243	-
C08F11.116|C08F11.116	-0.111591	0.903353	0.946096	5.04122	0.000755259	0.00622398	N2
T14F9.2|T14F9.2|T14F9.2	-0.019187	0.903255	0.946072	-0.442368	0.0301516	0.0918665	-
hmr-1|W02B9.1|W02B9.1b	0.042756	0.903046	0.945925	-0.199116	0.661891	0.787758	-
F28C6.9|F28C6.9|F28C6.9b	0.0727895	0.903078	0.945925	1.72265	0.0635571	0.158718	-
dph-3|K01H12.1|K01H12.1b	0.0343765	0.903	0.94592	0.627772	0.0810912	0.189359	-
C16E9.20|C16E9.20	-0.138625	0.902832	0.945783	0.864149	0.570445	0.720247	-
C09D4.4|C09D4.4|C09D4.4c	0.031716	0.902721	0.945728	-0.472246	0.164256	0.311052	-
B0261.4|B0261.4|B0261.4a	-0.0183216	0.902742	0.945728	-0.0391014	0.84014	0.907964	-
iftb-1|K04G2.1|K04G2.1	0.0195955	0.902587	0.945643	-0.178979	0.386637	0.561131	-
T20F10.6|T20F10.6	-0.135031	0.90252	0.945643	-0.134095	0.928342	0.960971	-
mtx-2|ZC97.1|ZC97.1a	-0.0170831	0.902559	0.945643	-0.123565	0.492996	0.657176	-
ZK632.9|ZK632.9|ZK632.9	0.0184217	0.902388	0.945551	-0.0351008	0.856513	0.917832	-
R02D5.6|R02D5.6|R02D5.6b	-0.0685399	0.902261	0.945465	-0.39506	0.635125	0.768888	-
F07B7.2|F07B7.2|F07B7.2	0.0181819	0.902209	0.945465	0.10512	0.617586	0.756256	-
W09B7.2|W09B7.2|W09B7.2	0.0181819	0.902209	0.945465	0.10512	0.617586	0.756256	-
str-225|C07G3.6|C07G3.6	-0.155708	0.902269	0.945465	1.03572	0.547568	NA	-
sri-73|C14C6.10|C14C6.10	0.169408	0.902061	0.945403	-0.543309	0.75808	NA	-
F53F4.13|F53F4.13|F53F4.13	-0.016387	0.902034	0.945403	-0.294432	0.0882882	0.201224	-
viln-1|C10H11.1|C10H11.1	0.0274549	0.901938	0.945351	0.0420771	0.883985	0.934014	-
F14B6.4|F14B6.4|F14B6.4	0.0494903	0.901863	0.945325	0.11373	0.828375	0.899494	-
F54D7.7|F54D7.7	0.0270909	0.901876	0.945325	0.323252	0.254362	0.423516	-
T05F1.5|T05F1.5|T05F1.5	-0.0201059	0.9017	0.945218	0.405252	0.0589829	0.150232	-
C45E5.3|C45E5.3|C45E5.3	0.0596536	0.90158	0.945133	0.459767	0.475585	0.642061	-
mgl-3|Y4C6A.2|Y4C6A.2a	0.0429705	0.901582	0.945133	0.509825	0.275648	0.447125	-
Y54G2A.50|Y54G2A.50|Y54G2A.50	-0.0267737	0.901457	0.94508	-0.233136	0.40944	0.582678	-
C50C3.7|C50C3.7|C50C3.7	0.0257911	0.901372	0.945029	-0.137164	0.61295	0.752892	-
isp-1|F42G8.12|F42G8.12	0.0224701	0.901139	0.944824	0.0385224	0.869044	0.925314	-
W02F12.5|W02F12.5|W02F12.5	0.0216234	0.901101	0.944822	-0.531951	0.0181825	0.0638521	-
C17H12.12|C17H12.12|C17H12.12	-0.0206289	0.901089	0.944822	0.113035	0.605839	0.74704	-
sto-5|F41G4.3|F41G4.3a	0.0242424	0.901036	0.944822	0.152865	0.554118	0.706319	-
ZC190.8|ZC190.8|ZC190.8	-0.0303475	0.900923	0.944752	0.611864	0.057016	0.146745	-
M05D6.9|M05D6.9|M05D6.9	-0.038168	0.900773	0.944634	-0.105448	0.794815	0.876922	-
ser-1|F59C12.2|F59C12.2b	-0.0508874	0.900555	0.944464	-0.153839	0.782366	0.86927	-
lgc-16|T01H10.5|T01H10.5	0.223996	0.900574	0.944464	0.953413	0.707854	NA	-
fipr-12|T07C12.13|T07C12.13	0.221017	0.900481	0.944444	-1.27103	0.570323	NA	-
gnrr-4|C41G11.4|C41G11.4a	0.0342045	0.900425	0.944424	-0.136254	0.712236	0.824717	-
sri-76|D2062.10	-0.210731	0.900347	0.944381	1.2524	0.576724	NA	-
lgc-40|T24D8.1|T24D8.1	0.0486119	0.900258	0.944326	0.465172	0.351531	0.526245	-
F40F4.7|F40F4.7|F40F4.7	0.0221381	0.900013	0.944108	0.265539	0.242455	0.409432	-
F01D4.8|F01D4.8|F01D4.8	-0.0630254	0.89994	0.944105	-0.668926	0.312882	0.486395	-
B0391.8|B0391.8	0.0317371	0.899941	0.944105	-0.32582	0.358069	0.532782	-
srh-2|C05E4.14|C05E4.14a	-0.105025	0.899973	0.944105	1.44536	0.227662	0.392332	-
str-83|B0213.7|B0213.7	0.222812	0.899802	0.944042	1.99695	0.379203	NA	-
R10D12.1|R10D12.1|R10D12.1	0.031197	0.899765	0.944042	-0.116159	0.722768	0.832034	-
Y66H1A.4|Y66H1A.4|Y66H1A.4	0.0205683	0.899726	0.944039	0.00238431	0.990975	0.995235	-
C09G9.5|C09G9.5|C09G9.5b	-0.0388192	0.899578	0.943923	0.521162	0.201884	0.360518	-
spe-8|F53G12.6|F53G12.6	0.0266108	0.899495	0.943875	0.601971	0.0314354	0.0946031	-
T08B2.7|T08B2.7|T08B2.7c	-0.0106638	0.899288	0.943697	-0.360246	0.00109111	0.00817121	-
Y38H6C.18|Y38H6C.18|Y38H6C.18	0.185399	0.899235	0.943697	-0.0159519	0.991433	0.995368	-
W05G11.2|W05G11.2|W05G11.2	-0.0219603	0.899162	0.943697	0.0371603	0.870205	0.925911	-
ulp-3|Y48A5A.2|Y48A5A.2	-0.031201	0.89928	0.943697	0.293676	0.355306	0.529925	-
Y55D5A.2|Y55D5A.2|Y55D5A.2	0.109351	0.899205	0.943697	1.58799	0.191226	0.346656	-
dpy-31|R151.5|R151.5b	-0.0308182	0.89904	0.94363	-0.266663	0.400413	0.574196	-
nhr-40|T03G6.2|T03G6.2a	0.0324015	0.898896	0.943551	-0.261187	0.44636	0.615926	-
unc-58|T06H11.1|T06H11.1a	-0.0402024	0.898927	0.943551	-0.148476	0.730341	0.836834	-
nhr-5|Y73F8A.21|Y73F8A.21	-0.061734	0.898843	0.943539	0.405565	0.534009	0.69079	-
gly-5|Y39E4B.12|Y39E4B.12b	0.0210015	0.8988	0.943533	-0.309406	0.153738	0.297198	-
Y54E10A.11|Y54E10A.11|Y54E10A.11	0.0168683	0.898763	0.943533	-0.220228	0.20142	0.360063	-
ZK742.6|ZK742.6|ZK742.6	0.0316207	0.898775	0.943533	-0.211711	0.51172	0.672886	-
Y110A2AR.3|Y110A2AR.3|Y110A2AR.3a	-0.0147875	0.898749	0.943533	-0.0990234	0.514417	0.675057	-
K07A9.3|K07A9.3|K07A9.3	-0.0911961	0.898488	0.94336	-0.858173	0.404053	0.577323	-
tmbi-4|B0563.4|B0563.4	0.0164814	0.898371	0.943276	-0.145232	0.388783	0.56308	-
ver-4|F59F3.5|F59F3.5	0.0568797	0.898298	0.943239	-0.399285	0.510128	0.671354	-
ZK643.6|ZK643.6|ZK643.6	0.108356	0.898276	0.943239	0.617925	0.628838	0.76436	-
C18B2.2|C18B2.2|C18B2.2	0.0792164	0.898216	0.94323	0.852168	0.368155	0.543177	-
F39H12.3|F39H12.3|F39H12.3	0.0262267	0.897908	0.942945	-0.147931	0.581063	0.728116	-
T13C5.9|T13C5.9|T13C5.9	0.0580709	0.897726	0.942796	-1.28066	0.0512056	0.135486	-
pgp-13|F22E10.2|F22E10.2	0.0392421	0.897726	0.942796	-0.526856	0.203582	0.362356	-
ZC449.4|ZC449.4|ZC449.4	0.0287743	0.89768	0.942796	0.154743	0.606142	0.74726	-
Y53G8AM.4|Y53G8AM.4|Y53G8AM.4	-0.115371	0.89762	0.942796	0.842492	0.517199	0.677222	-
F26H11.8|F26H11.8|F26H11.8	0.0994645	0.897729	0.942796	1.6731	0.0989421	0.217973	-
F21D9.5|F21D9.5	-0.249121	0.897702	0.942796	2.1845	0.403173	0.576637	-
AC3.14|AC3.14	-0.154132	0.897463	0.942774	0.425593	0.798625	NA	-
F21C10.11|F21C10.11|F21C10.11a	0.0682843	0.897486	0.942774	1.39919	0.0453082	0.124073	-
F07G6.8|F07G6.8|F07G6.8	0.195563	0.897439	0.942774	1.93331	0.2717	0.442741	-
B0454.18|B0454.18	0.223145	0.897297	0.942692	-0.996843	0.663948	NA	-
F11D11.3|F11D11.3|F11D11.3	0.161512	0.897261	0.942692	-0.418845	0.844158	0.910397	-
B0205.11|B0205.11|B0205.11	-0.0157744	0.897241	0.942692	-0.218523	0.167665	0.315343	-
mgl-3|Y4C6A.2|Y4C6A.2c	0.0466843	0.897182	0.942687	0.351142	0.470755	0.637963	-
Y47D3A.21|Y47D3A.21|Y47D3A.21	0.0191119	0.897018	0.942553	-0.263789	0.168973	0.317122	-
C27F2.4|C27F2.4|C27F2.4	-0.0245603	0.896982	0.942553	0.0871224	0.721728	0.831548	-
K07F5.15|K07F5.15|K07F5.15	-0.0257728	0.896734	0.942333	0.164558	0.520858	0.680452	-
Y20C6A.1|Y20C6A.1|Y20C6A.1a	-0.041816	0.896617	0.942257	-0.845274	0.056617	0.146055	-
fip-3|C06E1.5|C06E1.5	0.116352	0.896626	0.942257	1.20075	0.209701	0.370061	-
Y39B6A.21|Y39B6A.21	-0.0565582	0.896395	0.94217	-0.3279	0.557886	0.709327	-
F47B7.11|F47B7.11	0.207385	0.896397	0.94217	0.038422	0.98524	NA	-
Y44A6D.3|Y44A6D.3|Y44A6D.3	0.0361491	0.896335	0.94217	0.211534	0.559555	0.710703	-
zig-7|F54D7.4|F54D7.4	-0.0279122	0.896469	0.94217	0.324181	0.241616	0.408543	-
srx-15|C53D6.9	0.0924597	0.896455	0.94217	0.801706	0.411945	0.584785	-
btb-9|F45C12.4|F45C12.4	-0.0570282	0.896186	0.942067	0.0801544	0.887843	0.936496	-
abu-3|F31A3.1|F31A3.1	-0.217374	0.896064	0.941977	1.24492	0.56219	NA	-
mir-353|D1007.17	0.154872	0.895945	0.941891	-1.39787	0.421417	0.593833	-
F33G12.5|F33G12.5|F33G12.5	0.0186375	0.895902	0.941885	-0.725784	9.0951e-05	0.0013164	-
acbp-7|F26A1.15|F26A1.15	-0.0514973	0.895896	0.941885	0.371366	0.478157	0.644009	-
C03B8.2|C03B8.2|C03B8.2	-0.0211963	0.895669	0.941717	-0.282171	0.180939	0.332359	-
F39E9.8|F39E9.8	0.147647	0.895547	0.941627	0.453223	0.789384	0.8736	-
C46E1.3|C46E1.3|C46E1.3	-0.0452504	0.89535	0.941459	-0.577773	0.2301	0.395296	-
K09C4.10|K09C4.10|K09C4.10	0.0268422	0.895255	0.94143	-0.232249	0.386042	0.560401	-
rnp-6|Y47G6A.20|Y47G6A.20b	-0.0159083	0.895285	0.94143	0.0265193	0.865162	0.922987	-
R09D1.4|R09D1.4	0.274846	0.894998	0.941206	1.17516	0.670207	NA	-
egl-4|F55A8.2|F55A8.2a	-0.0188248	0.894883	0.941123	-0.387949	0.0360922	0.105014	-
F28E10.10|F28E10.10	-0.223954	0.894846	0.941123	0.322425	0.884455	NA	-
Y11D7A.16|Y11D7A.16	-0.0673772	0.894652	0.940957	1.01381	0.167346	0.314984	-
vps-41|F32A6.3|F32A6.3a	-0.0229943	0.894565	0.940905	-0.400099	0.0790687	0.18616	-
C53D5.1|C53D5.1|C53D5.1c	-0.0360892	0.894411	0.940841	-0.609608	0.0880172	0.200879	-
frm-9|F31B12.3|F31B12.3c	0.0552099	0.894446	0.940841	-0.268148	0.65211	0.780756	-
hil-2|Y73B6BL.9|Y73B6BL.9b	-0.0489324	0.894468	0.940841	-0.238719	0.6162	0.75522	-
F17C11.12|F17C11.12|F17C11.12a	0.0222437	0.894329	0.940841	-0.148525	0.501606	0.664538	-
har-1|C16C10.11|C16C10.11	0.0166532	0.894414	0.940841	0.00769007	0.962173	0.980804	-
kin-32|C30F8.4|C30F8.4b	0.0511054	0.894263	0.940819	-0.308581	0.543755	0.698783	-
F22F1.2|F22F1.2|F22F1.2	-0.0547852	0.894257	0.940819	0.204381	0.686756	0.806133	-
Y102A11A.6|Y102A11A.6|Y102A11A.6	0.051239	0.893826	0.940437	-0.166661	0.737545	0.841698	-
srj-26|ZK262.10|ZK262.10	-0.136228	0.893565	0.940201	-1.46412	0.297972	0.471075	-
str-39|F37B4.12|F37B4.12	0.251703	0.893546	0.940201	-0.849797	0.732141	NA	-
gdi-1|Y57G11C.10|Y57G11C.10a	0.0315702	0.893396	0.940101	-0.400045	0.18909	0.343905	-
C39E9.8|C39E9.8|C39E9.8g	0.0307983	0.893358	0.940099	-0.122669	0.683344	0.803897	-
ZK1127.4|ZK1127.4|ZK1127.4	-0.0235745	0.89322	0.940016	0.0282832	0.900711	0.944093	-
Y105C5A.17|Y105C5A.17|Y105C5A.17	0.114197	0.893241	0.940016	1.45388	0.248856	0.416751	-
F23H12.10|F23H12.10	-0.0188681	0.893083	0.939927	-0.292299	0.112963	0.23934	-
max-2|Y38F1A.10|Y38F1A.10a	0.0225363	0.892996	0.939917	-0.201222	0.359143	0.533796	-
nhr-101|H12C20.6	0.027435	0.893037	0.939917	0.265099	0.319303	0.492639	-
F13D12.10|F13D12.10|F13D12.10	-0.0495935	0.893013	0.939917	0.582443	0.232727	0.398623	-
R151.4|R151.4|R151.4a	0.0467241	0.892827	0.939812	1.19432	0.00866213	0.037256	-
T08B2.8|T08B2.8|T08B2.8	-0.0250452	0.892483	0.939489	0.114932	0.630481	0.765495	-
C12D8.2|C12D8.2	-0.110142	0.892411	0.939452	-0.640364	0.586923	0.733071	-
nol-9|K09B11.2|K09B11.2b	0.0209133	0.892341	0.939417	-0.161271	0.419151	0.591761	-
T08B2.7|T08B2.7|T08B2.7a	-0.0114785	0.892229	0.939338	-0.368335	0.000888245	0.00699392	-
ostd-1|M01A10.3|M01A10.3	-0.020314	0.892157	0.939338	-0.231605	0.233154	0.398993	-
W06B11.7|W06B11.7	0.344085	0.892223	0.939338	1.82166	0.582945	NA	-
rme-1|W06H8.1|W06H8.1c	-0.0282705	0.891804	0.939006	-0.213576	0.427193	0.59867	-
sax-3|ZK377.2|ZK377.2b	-0.0380661	0.891629	0.938973	-0.731146	0.0460249	0.125473	-
C17G10.9|C17G10.9|C17G10.9a	0.0269024	0.891641	0.938973	-0.368695	0.148911	0.290307	-
oac-59|C42C1.7|C42C1.7b	0.0324373	0.89171	0.938973	-0.278923	0.368577	0.543571	-
pac-1|C04D8.1|C04D8.1a	-0.0457443	0.891582	0.938973	-0.23415	0.593736	0.738273	-
F53C3.8|F53C3.8|F53C3.8	-0.199814	0.891494	0.938973	-0.0900984	0.963094	0.98113	-
unc-49|T21C12.1|T21C12.1f	0.035144	0.891547	0.938973	0.0689624	0.841994	0.909103	-
ZK484.5|ZK484.5|ZK484.5	-0.0273429	0.891731	0.938973	0.408911	0.115138	0.242462	-
frk-1|T04B2.2|T04B2.2a	0.0290642	0.89155	0.938973	0.802377	0.00388616	0.0206764	-
str-170|T08B6.7|T08B6.7	0.193512	0.891736	0.938973	2.09389	0.248785	0.416702	-
F56A8.3|F56A8.3|F56A8.3a	-0.0332463	0.891386	0.938971	-0.761792	0.0156476	0.0574847	-
sgt-1|R05F9.10|R05F9.10	-0.0230149	0.891403	0.938971	-0.392624	0.072018	0.174139	-
F37C4.7|F37C4.7|F37C4.7	0.051257	0.891305	0.938971	1.14704	0.0267522	0.0841319	-
W04D2.14|W04D2.14	0.126975	0.891401	0.938971	1.30153	0.32772	0.50115	-
sor-1|ZK1236.3|ZK1236.3b	-0.0393403	0.891151	0.93886	-0.912437	0.0174895	0.0622202	-
srsx-18|C04E6.2|C04E6.2	0.11836	0.891013	0.938754	1.56117	0.2205	0.3832	-
T08B6.1|T08B6.1|T08B6.1	0.154638	0.890759	0.938525	0.0628909	0.964571	0.981772	-
Y39G10AR.20|Y39G10AR.20|Y39G10AR.20	-0.0347473	0.890678	0.938478	0.325908	0.316874	0.490588	-
cat-2|B0432.5|B0432.5a	0.0569167	0.89067	0.938478	0.353663	0.54777	0.702077	-
emb-9|K04H4.1|K04H4.1a	0.0467385	0.890465	0.938331	0.511393	0.243946	0.411317	-
F16B12.4|F16B12.4|F16B12.4	0.0373806	0.8904	0.938331	-0.20199	0.57196	0.721453	-
F54D5.17|F54D5.17|F54D5.17	-0.0505054	0.890428	0.938331	0.492234	0.279734	0.451435	-
F17C8.8|F17C8.8	0.0239865	0.890255	0.938226	-0.292703	0.202175	0.360672	-
ncx-2|C10G8.5|C10G8.5b	0.0515143	0.890183	0.938189	0.0170904	0.972092	0.986121	-
C48B6.10|C48B6.10|C48B6.10	0.0318209	0.890091	0.93813	0.0874729	0.768432	0.860531	-
T22B11.3|T22B11.3|T22B11.3	0.0589311	0.889998	0.938071	-0.134733	0.816409	0.892	-
Y47D9A.1|Y47D9A.1|Y47D9A.1a	0.0327225	0.889807	0.937909	-0.417357	0.175358	0.325444	-
F41E6.5|F41E6.5|F41E6.5a	-0.0199872	0.889641	0.937772	-0.0623733	0.738381	0.842118	-
T16G1.5|T16G1.5|T16G1.5	0.0604327	0.889471	0.937632	1.79572	0.001975	0.0125602	-
ard-1|F01G4.2|F01G4.2	0.0188163	0.889391	0.937587	-0.238244	0.173145	0.322436	-
C53D5.1|C53D5.1|C53D5.1d	-0.0364054	0.889316	0.937546	-0.561338	0.10767	0.231302	-
fbxc-12|C44C8.7|C44C8.7	0.139922	0.889168	0.937428	-1.08426	0.432843	0.604001	-
unc-26|JC8.10|JC8.10a	0.0405174	0.889084	0.937379	-0.356457	0.34873	0.523083	-
pef-1|F23H11.8|F23H11.8b	0.0517144	0.889001	0.937329	0.18749	0.697641	0.814268	-
fbxc-54|F23F1.3|F23F1.3	-0.0363096	0.888975	0.937329	0.205988	0.544774	0.699444	-
frk-1|T04B2.2|T04B2.2b	0.0307476	0.888985	0.937329	0.824823	0.00399745	0.0210947	-
C08E8.9|C08E8.9|C08E8.9	-0.115113	0.88888	0.937318	2.28373	0.0935308	0.209361	-
C03F11.4|C03F11.4|C03F11.4	0.0294302	0.888761	0.937232	-0.226112	0.410368	0.583525	-
alh-8|F13D12.4|F13D12.4b	-0.02019	0.888654	0.937232	-0.214289	0.25093	0.41918	-
Y48G1A.3|Y48G1A.3|Y48G1A.3	-0.0194316	0.88876	0.937232	-0.160453	0.374186	0.549202	-
pho-14|T13B5.3|T13B5.3	-0.0279234	0.888728	0.937232	0.0932184	0.718264	0.829231	-
T12E12.3|T12E12.3|T12E12.3	-0.0417129	0.888493	0.937104	-0.41408	0.288531	0.460647	-
his-73|W09H1.2	-0.0339492	0.888357	0.936999	0.378616	0.226853	0.391469	-
F52E1.13|F52E1.13|F52E1.13d	0.0532646	0.888233	0.936907	-0.362573	0.484685	0.649912	-
F36G3.2|F36G3.2|F36G3.2	-0.0413091	0.888072	0.936776	-0.898658	0.0200301	0.0685984	-
gcl-1|Y62E10A.16|Y62E10A.16	0.0472697	0.887946	0.936682	0.337914	0.438427	0.609391	-
lin-2|F17E5.1|F17E5.1a	0.0475802	0.887833	0.936601	0.0106416	0.981436	0.990658	-
F58A4.18|F58A4.18	0.167409	0.887536	0.936326	1.13703	0.404484	0.577435	-
C54F6.12|C54F6.12|C54F6.12	-0.0900611	0.887203	0.936013	-1.46338	0.0922924	0.207591	-
F43B10.1|F43B10.1|F43B10.1	0.221421	0.887149	0.936013	0.229158	0.91183	NA	-
ZK637.12|ZK637.12|ZK637.12	0.0325822	0.887182	0.936013	0.681741	0.021981	0.0732689	-
nhr-105|C06G3.1|C06G3.1a	-0.0374439	0.886963	0.935876	-0.337992	0.322449	0.495934	-
Y46G5A.23|Y46G5A.23|Y46G5A.23	0.198608	0.886961	0.935876	0.503073	0.764716	NA	-
srsx-28|C51E3.3|C51E3.3	-0.17329	0.886887	0.935874	0.313161	0.865913	0.923333	-
ugt-15|C44H9.1|C44H9.1	-0.0626456	0.886798	0.935842	-1.35765	0.0194158	0.0669687	-
C34E11.4|C34E11.4|C34E11.4	0.0533936	0.886778	0.935842	-0.0850439	0.859623	0.919718	-
Y37E11AR.7|Y37E11AR.7|Y37E11AR.7	0.0463649	0.886794	0.935842	0.281179	0.522305	0.68171	-
W10C8.6|W10C8.6|W10C8.6	0.0449623	0.886821	0.935842	0.396017	0.331664	0.505127	-
F13G11.2|F13G11.2|F13G11.2	-0.0348949	0.886728	0.935842	0.465643	0.145393	0.285399	-
cyp-13A10|ZK1320.4|ZK1320.4	-0.0678619	0.886593	0.935795	0.359718	0.55391	0.706319	-
ZK84.2|ZK84.2|ZK84.2	-0.0286052	0.886476	0.93571	0.445626	0.0868788	0.198973	-
C55A6.4|C55A6.4|C55A6.4	-0.0318622	0.88634	0.935605	-0.451547	0.12143	0.251073	-
ttm-1|Y39E4A.2|Y39E4A.2a	0.0364631	0.88629	0.935602	-0.412299	0.220264	0.382917	-
F31E3.6|F31E3.6|F31E3.6	-0.0183161	0.8863	0.935602	0.015412	0.925435	0.958924	-
tag-130|ZK721.1|ZK721.1c	-0.0380818	0.886264	0.935602	0.035588	0.922188	0.95714	-
lgc-19|Y105C5B.16|Y105C5B.16	0.0982183	0.886148	0.935557	1.34242	0.159707	0.304768	-
C26B9.1|C26B9.1|C26B9.1b	-0.067252	0.886031	0.935473	0.601725	0.341964	0.516112	-
pde-4|R153.1|R153.1g	-0.0339415	0.88599	0.935468	0.0309868	0.921199	0.956564	-
C10G11.6|C10G11.6|C10G11.6	-0.0359833	0.885847	0.935355	0.169934	0.617024	0.755891	-
F25H2.3|F25H2.3|F25H2.3	0.218371	0.88572	0.93526	0.249398	0.900703	NA	-
ZK757.4|ZK757.4|ZK757.4b	0.0224313	0.885681	0.935257	-0.119161	0.564428	0.715059	-
Y48A6B.14|Y48A6B.14|Y48A6B.14	0.250895	0.885647	0.935257	2.1941	0.344399	NA	-
Y48G8AL.15|Y48G8AL.15|Y48G8AL.15	-0.0378679	0.885455	0.935097	0.346713	0.305902	0.479533	-
C18F10.7|C18F10.7|C18F10.7b	-0.0554343	0.885283	0.934953	-0.685073	0.20523	0.364638	-
tbx-38|C24H11.3|C24H11.3	0.178555	0.884965	0.934657	1.19562	0.491485	0.655732	-
F10E7.5|F10E7.5|F10E7.5	-0.0261258	0.884713	0.934428	0.0451131	0.84624	0.911664	-
nhr-101|H12C20.6|H12C20.6a	0.0294033	0.884656	0.934407	0.262682	0.320435	0.493765	-
tag-333|C48G7.3|C48G7.3h	0.0431532	0.884404	0.934289	-0.614728	0.117355	0.245895	-
W06A11.1|W06A11.1|W06A11.1	0.0804919	0.884508	0.934289	-0.362616	0.63945	0.771042	-
T19D12.6|T19D12.6|T19D12.6	0.0230093	0.884504	0.934289	-0.35595	0.0833203	0.192985	-
C01B10.47|C01B10.47	0.224674	0.88444	0.934289	-0.181831	0.928952	0.961278	-
gcy-18|ZK896.8|ZK896.8	0.0437143	0.884344	0.934271	0.213032	0.602475	0.744574	-
F56A4.10|F56A4.10|F56A4.10	0.0632968	0.884164	0.934132	-0.288195	0.621129	0.758669	-
F49C12.15|F49C12.15|F49C12.15	-0.0231775	0.884176	0.934132	0.256256	0.214397	0.375727	-
odr-1|R01E6.1|R01E6.1a	0.0962692	0.884149	0.934132	0.645155	0.468127	0.635595	-
F56A4.6|F56A4.6|F56A4.6	-0.285831	0.883924	0.933982	1.41974	0.59156	0.736574	-
B0496.11|B0496.11|B0496.11	-0.0651923	0.883865	0.933958	0.421028	0.465554	0.633329	-
mgl-3|Y4C6A.2|Y4C6A.2b	-0.0933517	0.883639	0.933758	0.613309	0.47887	0.64451	-
pmt-1|ZK622.3|ZK622.3d	0.03038	0.883524	0.933744	-0.438124	0.101827	0.222294	-
flp-11|K02G10.4|K02G10.4b	-0.0230421	0.88359	0.933744	0.379159	0.0661055	0.163518	-
srx-19|T05A12.1|T05A12.1	0.136639	0.883577	0.933744	1.85897	0.181525	0.333085	-
W03A5.6|W03A5.6|W03A5.6	0.0859691	0.883396	0.933655	-0.501493	0.539464	0.694806	-
arrd-22|T20D4.6|T20D4.6	-0.0487058	0.883192	0.933478	0.0833937	0.849003	0.913494	-
fbxa-182|F42G2.4|F42G2.4	-0.105374	0.883141	0.933478	0.801089	0.434382	0.60565	-
F11C1.9|F11C1.9|F11C1.9	-0.239011	0.883156	0.933478	0.907891	0.668355	NA	-
Y48G8AL.5|Y48G8AL.5|Y48G8AL.5	0.0308859	0.882954	0.933391	-0.781494	0.00451294	0.0229701	-
F52A8.1|F52A8.1|F52A8.1	0.0248685	0.882978	0.933391	-0.267873	0.221435	0.384273	-
F11A3.3|F11A3.3	0.137543	0.883	0.933391	3.18873	0.0414418	0.116404	-
T21E8.5|T21E8.5|T21E8.5	0.216662	0.882729	0.933221	-1.64559	0.440115	NA	-
mca-3|Y67D8C.10|Y67D8C.10b	0.0247185	0.882475	0.932991	-0.347246	0.109196	0.233619	-
elpc-3|ZK863.3|ZK863.3	-0.0239817	0.882365	0.932914	0.199433	0.340405	0.514547	-
hum-8|Y66H1A.6|Y66H1A.6b	-0.0320218	0.882088	0.932659	-0.0841424	0.764176	0.85772	-
lips-1|F45E6.4|F45E6.4	0.0715585	0.882077	0.932659	0.254621	0.691344	0.809698	-
sri-29|B0454.4|B0454.4	-0.241476	0.881913	0.932551	0.371836	0.862318	NA	-
C26E6.6|C26E6.6|C26E6.6	0.0155138	0.881852	0.932526	-0.196367	0.147041	0.287667	-
F36D4.5|F36D4.5|F36D4.5b	0.0338997	0.881775	0.932483	-0.225652	0.444193	0.614279	-
gly-11|Y75B8A.9|Y75B8A.9a	0.042458	0.88173	0.932483	0.472361	0.205718	0.36516	-
clec-174|Y46C8AL.2|Y46C8AL.2	-0.198882	0.881752	0.932483	0.886345	0.611605	0.75159	-
Y82E9BR.13|Y82E9BR.13|Y82E9BR.13	0.0535155	0.881661	0.932478	1.53834	0.000817382	0.00656179	-
srh-269|T03E6.5|T03E6.5	0.10558	0.881589	0.93244	0.111781	0.905676	0.947074	-
Y48A6C.2|Y48A6C.2	0.0467744	0.881501	0.932385	0.77309	0.0490353	0.131531	-
Y69A2AR.7|Y69A2AR.7|Y69A2AR.7c	-0.052855	0.88145	0.93237	0.273479	0.555791	0.707594	-
T04A8.13|T04A8.13|T04A8.13	0.0566602	0.881163	0.932106	1.68409	0.00062828	0.00543881	-
F53A2.10|F53A2.10	-0.078737	0.88108	0.932056	-0.00816027	0.990404	0.995065	-
F01G4.6|F01G4.6|F01G4.6b	-0.0276407	0.880994	0.932004	-0.516236	0.0308773	0.0934393	-
Y7A5A.7|Y7A5A.7|Y7A5A.7	0.173134	0.880516	0.931537	-0.610651	0.696861	0.813751	-
W06H8.2|W06H8.2|W06H8.2	0.0439715	0.880459	0.931515	0.0173042	0.9641	0.98162	-
coh-1|K08A8.3|K08A8.3	-0.0292415	0.880305	0.931391	-0.110462	0.667776	0.79227	-
F48G7.2|F48G7.2|F48G7.2b	0.0739868	0.880234	0.931354	0.788501	0.221424	0.384273	-
C40H5.2|C40H5.2|C40H5.2b	0.0634339	0.880123	0.931275	0.493076	0.39762	0.571479	-
C25G6.4|C25G6.4|C25G6.4	-0.0506187	0.879979	0.931161	0.263916	0.546206	0.700595	-
F13B12.2|F13B12.2|F13B12.2	0.0492843	0.879908	0.931159	-0.616014	0.16143	0.307248	-
atp-5|C06H2.1|C06H2.1	-0.0241325	0.87994	0.931159	-0.201096	0.329891	0.503209	-
arf-3|F57H12.1|F57H12.1	0.0237248	0.879599	0.930875	-0.183548	0.365039	0.539813	-
F36A2.7|F36A2.7|F36A2.7	-0.026344	0.879486	0.930794	0.0247069	0.912315	0.951239	-
F07C6.2|F07C6.2|F07C6.2	0.0410771	0.879161	0.930489	0.495369	0.15531	0.299462	-
F45H11.8|F45H11.8	-0.0220656	0.879119	0.930483	-0.17738	0.34528	0.519582	-
W09C3.1|W09C3.1|W09C3.1	-0.0287469	0.878838	0.930224	0.448397	0.0690012	0.168799	-
T23F2.5|T23F2.5|T23F2.5	0.022236	0.878257	0.929647	-0.105014	0.577241	0.725236	-
F22D3.2|F22D3.2|F22D3.2b	-0.04217	0.878245	0.929647	0.019631	0.956722	0.977928	-
T05H4.3|T05H4.3|T05H4.3	0.0815061	0.878256	0.929647	0.386465	0.60384	0.745584	-
par-2|F58B6.3|F58B6.3a	-0.0384762	0.87819	0.929647	0.543746	0.101536	0.221874	-
cdh-4|F25F2.2|F25F2.2b	-0.0622525	0.878071	0.929638	-0.570942	0.298271	0.471264	-
atx-2|D2045.1|D2045.1a	0.0405754	0.878103	0.929638	-0.467784	0.172974	0.322265	-
K07A1.6|K07A1.6|K07A1.6	-0.0358343	0.878068	0.929638	0.481773	0.110476	0.235722	-
gst-15|F37B1.4|F37B1.4	0.0434004	0.878102	0.929638	0.763618	0.0370619	0.10707	-
C34H4.2|C34H4.2|C34H4.2	0.0696921	0.877951	0.929631	1.89014	0.00140813	0.00987022	-
C32E8.12|C32E8.12|C32E8.12	0.292099	0.8779	0.929616	0.462655	0.842964	NA	-
C38D9.8|C38D9.8|C38D9.8	-0.262118	0.877799	0.929572	0.231392	0.91419	NA	-
K08C7.4|K08C7.4|K08C7.4	-0.0745909	0.877822	0.929572	0.452314	0.499715	0.66304	-
nhr-271|T03E6.3|T03E6.3	0.233975	0.877535	0.929345	-0.883453	0.649598	NA	-
gdi-1|Y57G11C.10|Y57G11C.10b	0.0358041	0.877469	0.929345	-0.400354	0.183193	0.335469	-
F54D5.9|F54D5.9|F54D5.9	0.026726	0.877524	0.929345	-0.312138	0.165823	0.313029	-
C17G1.7|C17G1.7|C17G1.7	0.0505203	0.877304	0.929217	-0.389434	0.357788	0.532429	-
C30G7.2|C30G7.2|C30G7.2	0.0458823	0.877257	0.929217	0.22001	0.588728	0.734428	-
D1022.2|D1022.2|D1022.2	0.176278	0.877281	0.929217	1.50367	0.247164	0.415008	-
lev-10|Y105E8A.7|Y105E8A.7b	0.0218255	0.877188	0.929209	-0.00779538	0.966726	0.982993	-
mod-5|Y54E10BR.7|Y54E10BR.7	-0.0614029	0.877129	0.929209	0.151112	0.789622	0.873824	-
oac-37|H12I19.4|H12I19.4	-0.12999	0.877159	0.929209	0.570971	0.665569	0.790377	-
F59A1.11|F59A1.11|F59A1.11a	0.0963298	0.877124	0.929209	0.974338	0.236909	0.403057	-
Y38F2AR.13|Y38F2AR.13|Y38F2AR.13	-0.0561785	0.87698	0.929165	-0.487078	0.308789	0.48264	-
W04B5.3|W04B5.3|W04B5.3b	-0.0495167	0.877001	0.929165	0.747059	0.0718854	0.173928	-
cct-6|F01F1.8|F01F1.8a	-0.0333012	0.876898	0.929133	-0.330132	0.234636	0.400802	-
F25E5.16|F25E5.16|F25E5.16b	-0.0691552	0.876869	0.929133	-0.266047	0.67695	0.799173	-
M02D8.7|M02D8.7|M02D8.7	0.105424	0.876773	0.929077	1.95145	0.0364441	0.105684	-
F10C2.3|F10C2.3|F10C2.3	0.0530557	0.876482	0.928807	-0.0244578	0.956169	0.977607	-
ncx-2|C10G8.5|C10G8.5a	0.0579636	0.876334	0.928699	0.0243593	0.960165	0.979718	-
C27D8.2|C27D8.2|C27D8.2	0.0222272	0.876343	0.928699	0.378113	0.0435782	0.120868	-
Y55B1AR.2|Y55B1AR.2|Y55B1AR.2a	-0.0371648	0.876253	0.92868	-0.391661	0.209913	0.37025	-
alh-1|F54D8.3|F54D8.3b	0.0242871	0.876219	0.92868	-0.281927	0.161524	0.307352	-
xbx-4|C23H5.3|C23H5.3	0.0767754	0.876251	0.92868	0.0558837	0.931446	0.962621	-
kcc-2|H16O14.1|H16O14.1a	0.0319182	0.876138	0.928674	-0.0830135	0.75939	0.85526	-
F11G11.4|F11G11.4|F11G11.4	0.0281067	0.8761	0.928673	0.288315	0.221561	0.38441	-
Y82E9BL.9|Y82E9BL.9	0.0613499	0.87609	0.928673	0.701441	0.169182	0.317392	-
C09E7.5|C09E7.5|C09E7.5	0.0733182	0.87601	0.928654	-0.258572	0.67942	0.801048	-
C53D5.1|C53D5.1|C53D5.1b	-0.0410617	0.875914	0.928626	-0.562011	0.10889	0.233187	-
C04C3.6|C04C3.6|C04C3.6	-0.130371	0.875947	0.928626	0.0898736	0.939922	0.967894	-
mes-3|F54C1.3|F54C1.3a	0.0347961	0.875862	0.928613	-0.381854	0.213432	0.374704	-
sesn-1|Y74C9A.5|Y74C9A.5	-0.0363213	0.875824	0.928613	-0.168976	0.578096	0.72589	-
F55G7.1|F55G7.1|F55G7.1	-0.0971974	0.875856	0.928613	1.60612	0.0388755	0.110886	-
ZK792.5|ZK792.5|ZK792.5	0.0407181	0.87573	0.928589	0.219459	0.513662	0.674391	-
rig-3|C53B7.1|C53B7.1	-0.047015	0.875632	0.928558	-0.188423	0.639792	0.771341	-
C10F3.4|C10F3.4|C10F3.4b	-0.0293399	0.875665	0.928558	0.0282476	0.908764	0.948837	-
Y111B2A.27|Y111B2A.27|Y111B2A.27	-0.0496648	0.875611	0.928558	0.940993	0.0213607	0.0717835	-
F22D3.5|F22D3.5|F22D3.5	-0.0872426	0.875193	0.928202	-0.389374	0.564793	0.715299	-
lin-2|F17E5.1|F17E5.1b	0.053115	0.87522	0.928202	0.0450652	0.921839	0.956905	-
ZK185.2|ZK185.2|ZK185.2	-0.0471407	0.875012	0.928059	-0.0337715	0.933381	0.963869	-
Y71A12B.2|Y71A12B.2|Y71A12B.2	0.126106	0.874696	0.927762	-1.39992	0.182061	0.333869	-
srsx-34|C25E10.3|C25E10.3c	-0.208937	0.874579	0.927676	-0.141997	0.943617	NA	-
rme-1|W06H8.1|W06H8.1a	-0.0461204	0.874399	0.927523	-0.460755	0.224614	0.388744	-
gnrr-4|C41G11.4|C41G11.4b	0.0448261	0.874334	0.927493	-0.00997954	0.979321	0.989366	-
Y54E2A.5|Y54E2A.5|Y54E2A.5	0.0367332	0.874103	0.927331	0.764497	0.0117371	0.0466444	-
ZC190.6|ZC190.6|ZC190.6	0.10653	0.874127	0.927331	0.834751	0.371658	0.54657	-
T08G5.14|T08G5.14	0.142192	0.874144	0.927331	1.17022	0.260851	0.431056	-
F23B12.7|F23B12.7|F23B12.7	0.0452513	0.874	0.927294	0.403271	0.27362	0.444974	-
Y37H2B.1|Y37H2B.1	-0.132785	0.873957	0.927286	0.833226	0.404285	0.577365	-
T27A3.2|T27A3.2|T27A3.2	-0.026654	0.873905	0.927269	-0.464819	0.0329589	0.0981168	-
T03F6.6|T03F6.6|T03F6.6	-0.0213307	0.873873	0.927269	0.167164	0.340674	0.514863	-
Y87G2A.13|Y87G2A.13|Y87G2A.13	-0.03064	0.873645	0.927143	-0.584509	0.0201316	0.0688826	-
bath-28|F14D2.13|F14D2.13b	-0.0262514	0.87368	0.927143	-0.193249	0.369002	0.543946	-
B0284.3|B0284.3|B0284.3	0.0509522	0.873712	0.927143	-0.104937	0.798712	0.879362	-
M7.9|M7.9|M7.9	0.120693	0.873713	0.927143	0.307346	0.730238	0.836771	-
Y23H5B.4|Y23H5B.4|Y23H5B.4	0.0475144	0.8736	0.927143	0.427622	0.292905	0.465149	-
K09C4.2|K09C4.2|K09C4.2	0.298241	0.8734	0.927004	1.93294	0.411113	0.584161	-
Y106G6A.1|Y106G6A.1|Y106G6A.1	-0.0237849	0.873243	0.926913	-0.252793	0.195324	0.351956	-
F56D2.9|F56D2.9	-0.222765	0.873279	0.926913	2.11979	0.29936	NA	-
nhr-227|T27B7.5|T27B7.5a	0.0735655	0.8732	0.926906	1.0227	0.100725	0.220594	-
kin-3|B0205.7|B0205.7	0.0350231	0.873136	0.926877	-0.41728	0.142015	0.280564	-
gap-2|ZK899.8|ZK899.8j	-0.0458098	0.873032	0.926805	-0.711411	0.0595031	0.151258	-
Y49A3A.3|Y49A3A.3|Y49A3A.3	0.040086	0.873016	0.926805	0.228254	0.479632	0.645216	-
F10E7.2|F10E7.2|F10E7.2	-0.0216758	0.872898	0.926751	0.124365	0.479192	0.644836	-
C38C3.8|C38C3.8|C38C3.8	-0.124496	0.872909	0.926751	1.14333	0.326486	0.499824	-
fbxa-180|F31E9.1	-0.0526207	0.87277	0.926681	0.0863946	0.843082	0.90986	-
F22E5.7|F22E5.7|F22E5.7	-0.159224	0.872686	0.926631	2.12482	0.185586	0.338764	-
F15H9.7|F15H9.7	0.216464	0.872457	0.926425	0.488021	0.773579	NA	-
F41E7.1|F41E7.1|F41E7.1	-0.0614217	0.872311	0.926309	-0.478426	0.344679	0.518965	-
C02C6.3|C02C6.3|C02C6.3d	-0.036599	0.872263	0.926309	-0.169494	0.565774	0.716329	-
C41G11.9|C41G11.9	0.237906	0.87229	0.926309	0.725072	0.710902	0.823772	-
thn-4|F49A5.6|F49A5.6	0.28815	0.87225	0.926309	2.49231	0.32279	0.496271	-
F15A4.6|F15A4.6|F15A4.6	0.023844	0.872046	0.926181	-0.0700451	0.715981	0.827414	-
Y116A8C.7|Y116A8C.7	-0.16102	0.871939	0.926106	0.42245	0.781242	0.8686	-
rgs-7|F56B6.2|F56B6.2a	-0.0366188	0.871841	0.926082	-0.0232664	0.93692	0.9661	-
C16C10.8|C16C10.8|C16C10.8	0.0235074	0.87188	0.926082	0.093767	0.618386	0.75669	-
Y44E3A.1|Y44E3A.1|Y44E3A.1a	0.0415887	0.871871	0.926082	0.220407	0.515777	0.676046	-
ZK688.4|ZK688.4|ZK688.4	0.0605426	0.87181	0.926082	1.22656	0.0124611	0.0488194	-
Y54G9A.9|Y54G9A.9|Y54G9A.9	0.0405051	0.871713	0.92606	0.18872	0.558261	0.709612	-
F59A2.5|F59A2.5|F59A2.5	-0.0366604	0.871659	0.92604	0.302322	0.299778	0.472804	-
cey-1|F33A8.3|F33A8.3	0.0214047	0.871593	0.926009	-0.0433024	0.800815	0.881047	-
Y71A12B.3|Y71A12B.3|Y71A12B.3	0.127657	0.87149	0.925969	-1.48391	0.150303	0.292418	-
faah-4|Y56A3A.12|Y56A3A.12b	-0.0226285	0.871514	0.925969	-0.196833	0.277576	0.449105	-
sams-5|T13A10.11|T13A10.11b	-0.0234722	0.871519	0.925969	0.32711	0.0819746	0.190841	-
K09H9.1|K09H9.1|K09H9.1	-0.0957228	0.871404	0.925962	-0.392436	0.635353	0.768974	-
E02C12.6|E02C12.6|E02C12.6	-0.0799095	0.871238	0.925824	-0.401736	0.562531	0.713245	-
K09C8.2|K09C8.2|K09C8.2	0.19608	0.871154	0.925773	1.38135	0.275947	0.447442	-
C30G12.1|C30G12.1|C30G12.1	0.0757356	0.871083	0.925736	0.510111	0.452053	0.620849	-
nhr-236|Y38F2AL.5|Y38F2AL.5	0.0733574	0.871076	0.925736	1.57479	0.0176491	0.0625972	-
C34B2.13|C34B2.13	0.314623	0.870856	0.925572	0.704967	0.785381	NA	-
Y25C1A.5|Y25C1A.5|Y25C1A.5	0.0296503	0.870692	0.925437	-0.0519789	0.82525	0.897697	-
T25B9.3|T25B9.3|T25B9.3a	0.0882327	0.870599	0.925376	0.496104	0.498075	0.661682	-
Y34B4A.6|Y34B4A.6|Y34B4A.6	-0.0273018	0.87032	0.925119	-0.156363	0.470386	0.637604	-
T05F1.8|T05F1.8|T05F1.8	-0.0365159	0.870321	0.925119	0.635266	0.0290559	0.0893715	-
Y71H10B.1|Y71H10B.1|Y71H10B.1c	-0.0434679	0.87019	0.925057	-0.487716	0.161289	0.307046	-
fbxa-131|W04E12.1|W04E12.1	-0.236902	0.870065	0.924997	-0.698027	0.718588	NA	-
pisy-1|Y46G5A.5|Y46G5A.5	0.0210749	0.870061	0.924997	-0.161049	0.335775	0.509403	-
C16B8.3|C16B8.3|C16B8.3	0.0335131	0.870054	0.924997	-0.0170656	0.948718	0.973087	-
F55B11.4|F55B11.4|F55B11.4	-0.0450122	0.870098	0.924997	0.329924	0.355304	0.529925	-
gap-2|ZK899.8|ZK899.8g	-0.0469286	0.869933	0.924976	-0.710128	0.0598999	0.151983	-
T24B1.1|T24B1.1|T24B1.1	-0.0406519	0.869766	0.924976	-0.578459	0.0731109	0.176127	-
Y7A5A.9|Y7A5A.9|Y7A5A.9	0.202116	0.869736	0.924976	-0.483572	0.695704	0.813096	-
tag-253|C37C3.8|C37C3.8a	-0.0522955	0.869886	0.924976	-0.254228	0.539193	0.69456	-
C18H7.13|C18H7.13|C18H7.13	-0.0756147	0.869933	0.924976	-0.055758	0.93404	0.964143	-
F56B3.6|F56B3.6|F56B3.6	0.0274995	0.869767	0.924976	0.302264	0.165434	0.31244	-
F22D6.8|F22D6.8|F22D6.8	-0.0382144	0.869811	0.924976	0.441054	0.142128	0.280697	-
efl-2|Y48C3A.17|Y48C3A.17b	0.0566612	0.869852	0.924976	0.520728	0.247975	0.415942	-
K04F10.2|K04F10.2|K04F10.2	0.0722327	0.869671	0.924976	0.985411	0.0911729	0.205943	-
let-2|F01G12.5|F01G12.5b	-0.0588299	0.869584	0.924952	0.591246	0.201351	0.359988	-
B0250.2|B0250.2|B0250.2	0.0409052	0.869437	0.924834	0.680588	0.0403312	0.114044	-
F58E10.1|F58E10.1|F58E10.1a	0.0423629	0.869364	0.924806	-0.223543	0.512347	0.673421	-
M70.1|M70.1|M70.1	0.0309031	0.869375	0.924806	-0.0113742	0.964081	0.98162	-
T19C9.10|T19C9.10|T19C9.10	0.133452	0.869256	0.924758	-1.6599	0.166938	0.314482	-
nuo-5|Y45G12B.1|Y45G12B.1c	0.0431885	0.869201	0.924758	-0.589258	0.0831819	0.192794	-
F42A10.5|F42A10.5|F42A10.5	-0.0449037	0.869097	0.924758	-0.472907	0.179754	0.330823	-
kin-32|C30F8.4|C30F8.4a	0.0631443	0.868969	0.924758	-0.359525	0.476224	0.642641	-
chhy-1|T22C8.2|T22C8.2	0.0426801	0.869006	0.924758	-0.312399	0.366867	0.541668	-
tag-184|F18C5.3|F18C5.3	0.0394916	0.869135	0.924758	-0.0542778	0.861005	0.920756	-
F32B4.4|F32B4.4|F32B4.4a	-0.0661698	0.869257	0.924758	0.0347525	0.948263	0.972727	-
H01M10.2|H01M10.2|H01M10.2	0.139944	0.869257	0.924758	0.542316	0.67006	0.793905	-
clec-9|Y70C5C.2|Y70C5C.2	-0.160127	0.869166	0.924758	1.2101	0.358812	0.533434	-
alh-1|F54D8.3|F54D8.3a	0.0259493	0.868784	0.924601	-0.277313	0.171693	0.320755	-
T05F1.13|T05F1.13|T05F1.13	-0.0422327	0.868706	0.924556	0.0387521	0.90646	0.947365	-
T12D8.6|T12D8.6|T12D8.6	-0.0300064	0.868524	0.924401	-0.470138	0.0451491	0.123794	-
C55C3.7|C55C3.7|C55C3.7	-0.134848	0.8685	0.924401	1.09031	0.357579	0.53227	-
F53C11.3|F53C11.3|F53C11.3	-0.025184	0.868315	0.924256	-0.242822	0.216877	0.37864	-
xrn-1|Y39G8C.1|Y39G8C.1	0.0682915	0.868245	0.924236	-0.157337	0.778272	0.866816	-
T07G12.8|T07G12.8|T07G12.8	-0.0382796	0.86826	0.924236	0.331423	0.265378	0.435542	-
unc-52|ZC101.2|ZC101.2e	0.0415754	0.868164	0.924211	-0.0535811	0.869353	0.925487	-
cyy-1|ZK353.1|ZK353.1b	0.0606448	0.86775	0.924085	-0.67332	0.159485	0.304438	-
F55G1.12|F55G1.12|F55G1.12	-0.121278	0.867959	0.924085	-0.643274	0.489466	0.65407	-
F11E6.1|F11E6.1|F11E6.1c	0.0396477	0.867896	0.924085	-0.546227	0.0807498	0.188737	-
oac-53|W06G6.1|W06G6.1	0.0968181	0.86796	0.924085	-0.517448	0.522904	0.682072	-
gsp-1|F29F11.6|F29F11.6	-0.0286512	0.867816	0.924085	-0.284594	0.203529	0.362324	-
nkat-3|R03A10.4|R03A10.4a	-0.0337154	0.868009	0.924085	-0.278708	0.289742	0.461664	-
pfd-2|H20J04.5|H20J04.5	-0.0286022	0.867791	0.924085	-0.0387469	0.861266	0.920873	-
F15E11.11|F15E11.11|F15E11.11	-0.0595819	0.86799	0.924085	0.0426455	0.933636	0.963929	-
peb-1|T14F9.4|T14F9.4b	-0.15368	0.867823	0.924085	0.192781	0.87802	0.930733	-
sta-1|Y51H4A.17|Y51H4A.17b	0.0801534	0.867812	0.924085	0.641186	0.348485	0.522802	-
srv-11|H25K10.3|H25K10.3	-0.348227	0.867861	0.924085	3.16938	0.231735	NA	-
Y54F10AL.1|Y54F10AL.1|Y54F10AL.1b	-0.0286847	0.867438	0.923936	-0.516238	0.022703	0.075094	-
lin-66|B0513.1|B0513.1a	-0.0392947	0.867472	0.923936	-0.267297	0.387752	0.562187	-
C25E10.10|C25E10.10|C25E10.10	-0.0387045	0.867446	0.923936	0.290637	0.331513	0.505077	-
H06O01.2|H06O01.2|H06O01.2	-0.0206584	0.867271	0.923839	-0.0997108	0.535393	0.691903	-
M04D8.7|M04D8.7|M04D8.7	0.0423501	0.867197	0.923839	0.167467	0.616654	0.755625	-
C06A12.17|C06A12.17	-0.274085	0.867272	0.923839	0.198474	0.922603	0.957248	-
F38A1.11|F38A1.11|F38A1.11	0.190381	0.867233	0.923839	0.684696	0.628967	0.764413	-
ZC123.4|ZC123.4|ZC123.4c	0.0414619	0.866914	0.923611	0.00298924	0.99281	0.995903	-
cyp-33C12|Y5H2B.6|Y5H2B.6	-0.157476	0.866873	0.923607	0.570158	0.695071	0.812705	-
sri-26|C41G6.14|C41G6.14	-0.288772	0.866706	0.923483	0.18834	0.936688	NA	-
C50F7.3|C50F7.3|C50F7.3	-0.030924	0.866721	0.923483	0.682574	0.00532834	0.0258596	-
ZK742.7|ZK742.7|ZK742.7	0.0576304	0.866591	0.923421	0.471183	0.295442	0.468313	-
taf-6.2|Y37E11AL.8|Y37E11AL.8	-0.0314269	0.866412	0.923269	-0.636004	0.0096788	0.0404758	-
set-28|Y73B3B.2|Y73B3B.2	-0.0910501	0.866242	0.923126	0.0980558	0.895461	0.941071	-
F13E9.19|F13E9.19|F13E9.19	0.351348	0.866212	0.923126	1.18512	0.659674	NA	-
B0511.16|B0511.16	-0.385248	0.866162	0.923118	-0.85725	0.77554	NA	-
ahcy-1|K02F2.2|K02F2.2	0.0321761	0.865936	0.922989	-0.235132	0.339482	0.513587	-
nhr-48|ZK662.3|ZK662.3b	0.060076	0.866004	0.922989	0.313285	0.518354	0.678409	-
F46F2.1|F46F2.1	0.193438	0.865992	0.922989	2.27863	0.189558	0.344579	-
wnk-1|C46C2.1|C46C2.1a	-0.0350167	0.865802	0.922889	0.0133883	0.960561	0.979873	-
rpl-11.1|T22F3.4|T22F3.4	-0.0338156	0.86576	0.922882	0.101976	0.692906	0.810947	-
Y116F11B.9|Y116F11B.9|Y116F11B.9a	-0.123319	0.865686	0.922842	-0.972868	0.384034	0.558374	-
F09A5.2|F09A5.2|F09A5.2	-0.0602838	0.865627	0.922818	0.840907	0.0796121	0.187153	-
hpk-1|F20B6.8|F20B6.8a	-0.0487115	0.865575	0.922801	-0.159162	0.685489	0.80534	-
T23G11.7|T23G11.7|T23G11.7b	0.0376954	0.865512	0.922773	-0.0859529	0.765707	0.858669	-
F44D12.4|F44D12.4|F44D12.4	-0.0310325	0.865454	0.922749	0.359351	0.128971	0.262076	-
dnj-25|W07A8.3|W07A8.3b	0.0502383	0.865225	0.922543	-0.489168	0.205908	0.365339	-
dnj-25|W07A8.3|W07A8.3c	0.0502383	0.865225	0.922543	-0.489168	0.205908	0.365339	-
cct-8|Y55F3AR.3|Y55F3AR.3	-0.0496291	0.865086	0.922543	-0.305449	0.418782	0.591512	-
K05B2.2|K05B2.2|K05B2.2a	0.0402688	0.865219	0.922543	-0.0736142	0.813695	0.890179	-
nhr-48|ZK662.3|ZK662.3a	0.0355232	0.865218	0.922543	0.220361	0.423183	0.595463	-
H15N14.3|H15N14.3	0.343185	0.865038	0.922536	4.04919	0.111263	NA	-
smd-1|F47G4.7|F47G4.7	-0.0441803	0.864647	0.922158	-0.300081	0.37055	0.545497	-
F41D9.2|F41D9.2|F41D9.2a	-0.0525009	0.864503	0.922043	0.0901008	0.824142	0.897053	-
R13H4.2|R13H4.2	-0.0178953	0.864466	0.922042	-0.195945	0.155288	0.299462	-
rgs-5|B0336.4|B0336.4a	0.0401019	0.86416	0.921902	-0.483665	0.125431	0.256863	-
C44B9.1|C44B9.1|C44B9.1	0.0404008	0.86414	0.921902	-0.393219	0.215625	0.377206	-
T05C1.4|T05C1.4|T05C1.4b	0.0331011	0.86402	0.921902	-0.127331	0.622143	0.759392	-
C44H9.4|C44H9.4|C44H9.4	0.04379	0.86429	0.921902	0.0600594	0.858832	0.919352	-
C05G5.2|C05G5.2|C05G5.2	0.0366114	0.864299	0.921902	0.261761	0.348274	0.522613	-
T04F3.3|T04F3.3|T04F3.3	0.0361749	0.864247	0.921902	0.528662	0.0553568	0.14365	-
C16D2.2|C16D2.2|C16D2.2	0.0697028	0.864185	0.921902	1.39212	0.00755586	0.0335325	-
Y45G12C.11|Y45G12C.11|Y45G12C.11	-0.339007	0.864177	0.921902	1.42784	0.593471	NA	-
T19D12.4|T19D12.4|T19D12.4b	-0.0762526	0.8642	0.921902	1.77523	0.00210842	0.0131517	-
C26E6.1|C26E6.1|C26E6.1	0.0710402	0.863921	0.921846	0.965731	0.0854595	0.196603	-
CC8.2|CC8.2|CC8.2b	0.0530613	0.863762	0.921715	-0.398897	0.331961	0.505399	-
daf-16|R13H8.1|R13H8.1c	-0.0316032	0.863611	0.921666	-0.14452	0.546529	0.700889	-
C34C12.7|C34C12.7|C34C12.7	-0.0306555	0.863671	0.921666	0.387104	0.0980446	0.216652	-
lgc-9|C04C3.2|C04C3.2	-0.0976141	0.863681	0.921666	1.18548	0.120434	0.249586	-
nhr-6|C48D5.1|C48D5.1b	-0.0814268	0.863203	0.921272	-0.396006	0.542948	0.697975	-
T20B12.11|T20B12.11	-0.128813	0.863024	0.921156	-0.57836	0.573877	0.723072	-
M116.5|M116.5|M116.5	-0.0656426	0.863058	0.921156	-0.243722	0.619492	0.757476	-
JC8.2|JC8.2|JC8.2	-0.0206226	0.862972	0.92114	0.0130868	0.932446	0.963138	-
C08F11.11|C08F11.11|C08F11.11	0.0332538	0.862946	0.92114	0.0508378	0.837967	0.90639	-
gap-2|ZK899.8|ZK899.8i	-0.0486382	0.862766	0.921066	-0.710168	0.0553143	0.143613	-
cct-6|F01F1.8|F01F1.8b	-0.0379409	0.86283	0.921066	-0.475403	0.093985	0.210109	-
C14F5.7|C14F5.7	-0.329984	0.862817	0.921066	-0.204711	0.935171	NA	-
C29H12.5|C29H12.5|C29H12.5	0.0345673	0.862688	0.92103	0.0994021	0.700077	0.81592	-
his-69|E03A3.3|E03A3.3	0.0704465	0.862605	0.92098	0.387289	0.456994	0.625682	-
C16A3.4|C16A3.4|C16A3.4	-0.0194499	0.862463	0.920866	-0.129959	0.370495	0.545481	-
sox-4|C12D12.5|C12D12.5	0.0818888	0.862391	0.920829	1.18514	0.0521185	0.137457	-
K05F1.6|K05F1.6|K05F1.6b	0.0658666	0.8622	0.920662	-0.689594	0.189897	0.34495	-
T05A1.5|T05A1.5|T05A1.5a	-0.10584	0.862122	0.920644	-0.115924	0.894628	0.940678	-
R12C12.8|R12C12.8|R12C12.8a	-0.0274764	0.862146	0.920644	-0.0889579	0.66816	0.792548	-
M01D7.1|M01D7.1|M01D7.1	-0.244973	0.862029	0.920596	2.34924	0.146497	0.286902	-
Y73B6BL.35|Y73B6BL.35|Y73B6BL.35	0.0582472	0.861936	0.920535	0.66603	0.131851	0.266078	-
Y51H4A.18|Y51H4A.18	-0.114008	0.86185	0.920481	0.356619	0.694961	0.812624	-
pot-3|3R5.1|3R5.1	0.0262467	0.861712	0.920449	-0.0364471	0.850288	0.91423	-
F35H12.7|F35H12.7|F35H12.7	-0.187921	0.861784	0.920449	0.00758031	0.995852	0.997691	-
T19B10.5|T19B10.5|T19B10.5	-0.0691207	0.861764	0.920449	0.330041	0.522663	0.681903	-
F54D12.8|F54D12.8|F54D12.8	-0.201262	0.861689	0.920449	1.64234	0.27029	0.441098	-
ZK892.6|ZK892.6|ZK892.6	-0.100391	0.861424	0.920403	-0.858326	0.300181	0.473224	-
pat-12|T17H7.4|T17H7.4b	0.0564173	0.861515	0.920403	-0.290769	0.488894	0.653661	-
cTel3X.2|cTel3X.2	-0.118442	0.861596	0.920403	-0.289376	0.767569	0.859798	-
cTel3X.3|cTel3X.3	-0.118442	0.861596	0.920403	-0.289376	0.767569	0.859798	-
T01D3.1|T01D3.1|T01D3.1	0.0640612	0.861469	0.920403	-0.244028	0.629482	0.764633	-
nas-17|K03B8.2|K03B8.2	-0.170927	0.861485	0.920403	-0.200435	0.856687	0.917978	-
Y45G12B.2|Y45G12B.2|Y45G12B.2a	0.021299	0.861509	0.920403	-0.144099	0.365801	0.540614	-
F09E10.7|F09E10.7|F09E10.7b	-0.0482499	0.861477	0.920403	0.0253262	0.944563	0.970392	-
F53B6.5|F53B6.5|F53B6.5	-0.12147	0.86128	0.920403	0.45235	0.623354	0.760228	-
F36A2.11|F36A2.11|F36A2.11	0.0355314	0.861551	0.920403	0.572296	0.031651	0.0950887	-
ape-1|F46F3.4|F46F3.4a	0.028872	0.861226	0.920396	-0.458601	0.0329876	0.0981785	-
Y42H9AR.1|Y42H9AR.1|Y42H9AR.1	0.0339475	0.861195	0.920396	-0.385627	0.125706	0.257232	-
C43H6.3|C43H6.3|C43H6.3	0.0426967	0.86123	0.920396	0.128142	0.686076	0.805748	-
srv-5|F48D6.2|F48D6.2a	-0.125299	0.861114	0.920396	0.540641	0.633916	0.7681	-
sru-47|F36D1.3|F36D1.3	0.164439	0.861169	0.920396	1.41366	0.286121	0.458006	-
F09D12.2|F09D12.2|F09D12.2	-0.0661641	0.860987	0.920329	0.246717	0.637366	0.769988	-
ZK512.10|ZK512.10|ZK512.10	-0.048324	0.860899	0.920274	0.825974	0.0202348	0.0691495	-
T05D4.5|T05D4.5|T05D4.5	-0.0664632	0.860899	0.920274	1.4509	0.00314056	0.0176714	-
bli-4|K04F10.4|K04F10.4b	-0.0272191	0.86072	0.920175	-0.21282	0.29681	0.469935	-
Y57G11A.2|Y57G11A.2|Y57G11A.2	0.0348044	0.860734	0.920175	0.184997	0.472519	0.639575	-
lin-66|B0513.1|B0513.1b	0.0689812	0.860582	0.920089	-0.765176	0.162735	0.309007	-
Y82E9BR.18|Y82E9BR.18|Y82E9BR.18	-0.0241971	0.860517	0.920089	-0.307267	0.0838986	0.193954	-
K09E4.1|K09E4.1|K09E4.1	-0.0479464	0.860571	0.920089	0.787293	0.0255184	0.0813952	-
F53G2.3|F53G2.3|F53G2.3	0.168786	0.860462	0.920076	0.475286	0.735852	0.840245	-
tag-253|C37C3.8|C37C3.8b	-0.060544	0.860374	0.92002	-0.456259	0.318471	0.492037	-
C08H9.6|C08H9.6|C08H9.6	0.109621	0.860356	0.92002	-0.0532342	0.951436	0.974881	-
F45G2.8|F45G2.8|F45G2.8	-0.0382008	0.860259	0.919975	0.105511	0.706177	0.820257	-
piki-1|F39B1.1|F39B1.1	-0.0323676	0.860192	0.919942	-0.307395	0.206814	0.366363	-
F53G12.9|F53G12.9|F53G12.9	0.0859491	0.859953	0.919725	0.463566	0.485244	0.650448	-
sma-9|T05A10.1|T05A10.1f	-0.0401543	0.859762	0.919559	-0.123059	0.682028	0.802811	-
K11H12.10|K11H12.10|K11H12.10	0.265638	0.859667	0.919496	2.11218	0.285967	NA	-
W09G3.1|W09G3.1|W09G3.1b	-0.0368923	0.85955	0.919409	-0.132337	0.629269	0.764538	-
W08E12.8|W08E12.8|W08E12.8b	0.0523196	0.85947	0.919361	-0.0890889	0.82172	0.895768	-
MTCE.16|MTCE.16|MTCE.16	0.0708659	0.859418	0.919345	-0.308246	0.551212	0.704795	-
srd-2|R05H5.1|R05H5.1	0.175284	0.85933	0.919289	0.876611	0.487503	0.652691	-
ZK757.4|ZK757.4|ZK757.4c	0.0264642	0.859273	0.919267	-0.199959	0.311833	0.48575	-
nhr-221|T24A6.8|T24A6.8	-0.144779	0.859129	0.919151	0.263764	0.812985	0.889526	-
C47A4.3|C47A4.3|C47A4.3	-0.0557588	0.858971	0.91902	0.125373	0.760573	0.85552	-
Y45F10A.7|Y45F10A.7|Y45F10A.7a	-0.0294729	0.858898	0.918981	-0.0372715	0.86386	0.921839	-
lgc-18|T01H10.7|T01H10.7	0.107168	0.858537	0.918633	0.168109	0.837137	0.905906	-
C50H2.4|C50H2.4|C50H2.4	-0.123544	0.858358	0.91848	0.678337	0.475348	0.641847	-
T01G5.8|T01G5.8|T01G5.8	0.0322007	0.858298	0.918456	-0.140064	0.564833	0.715313	-
ZK20.4|ZK20.4	0.0470985	0.8583	0.918456	0.608487	0.0714463	0.173139	-
bath-12|F59H5.3	-0.0493125	0.858191	0.918417	0.281032	0.437764	0.608928	-
F19B6.1|F19B6.1|F19B6.1b	0.0617116	0.858097	0.918366	-0.648214	0.150526	0.292759	-
MTCE.31|MTCE.31|MTCE.31	0.0453052	0.858108	0.918366	0.304517	0.351968	0.526636	-
T19C3.7|T19C3.7|T19C3.7	-0.119285	0.85808	0.918366	1.69621	0.0597732	0.151771	-
sup-9|F34D6.3|F34D6.3	0.0491203	0.857958	0.918321	-0.0531151	0.886676	0.935543	-
nhr-105|C06G3.1|C06G3.1b	-0.0487069	0.857834	0.918279	-0.356958	0.313433	0.486829	-
rpl-3|F13B10.2|F13B10.2c	0.0318356	0.857875	0.918279	-0.201248	0.380797	0.555666	-
K09E9.7|K09E9.7|K09E9.7	-0.0809111	0.85778	0.918279	-0.138383	0.811925	0.888922	-
F38E11.5|F38E11.5|F38E11.5	-0.0282056	0.857806	0.918279	-0.125079	0.541016	0.696293	-
elpc-2|Y111B2A.17|Y111B2A.17	-0.0372171	0.857769	0.918279	-0.0763184	0.776082	0.865952	-
Y71H2AL.1|Y71H2AL.1|Y71H2AL.1	-0.0273142	0.857882	0.918279	-0.0722092	0.715735	0.827207	-
Y53G8B.2|Y53G8B.2|Y53G8B.2	0.0344705	0.857666	0.918279	0.0951776	0.702462	0.817588	-
trr-1|C47D12.1|C47D12.1a	0.0399536	0.857375	0.918005	-0.12656	0.660719	0.786865	-
Y105C5A.1268|Y105C5A.1268|Y105C5A.1268	0.110682	0.857306	0.91797	-0.447608	0.564023	0.714656	-
sre-29|F57G9.4|F57G9.4	0.268772	0.857226	0.917922	1.37213	0.423434	0.595512	-
F43C9.5|F43C9.5	0.327906	0.857071	0.917795	0.580006	0.809345	NA	-
T28H11.7|T28H11.7|T28H11.7	-0.0363841	0.856895	0.917645	0.36477	0.162369	0.308528	-
btb-20|F57C2.1|F57C2.1	-0.0383684	0.856818	0.917601	0.131572	0.631113	0.765965	-
F46A8.2|F46A8.2	-0.230625	0.856779	0.917598	-1.28241	0.450282	0.61936	-
R08C7.2|R08C7.2|R08C7.2c	-0.0162029	0.856757	0.917598	-0.33266	0.00466075	0.0235192	-
R13.9|R13.9	0.258503	0.85671	0.917598	0.121208	0.954127	NA	-
ash-2|Y17G7B.2|Y17G7B.2c	-0.0460339	0.856649	0.917582	-0.480117	0.153869	0.297373	-
F49E2.2|F49E2.2|F49E2.2a	-0.048722	0.856603	0.917582	-0.204903	0.561524	0.712447	-
C15C7.6|C15C7.6|C15C7.6	0.071395	0.856657	0.917582	0.214783	0.684085	0.80446	-
Y71H10B.1|Y71H10B.1|Y71H10B.1a	-0.0487114	0.856416	0.91744	-0.547032	0.118287	0.247162	-
str-94|F07C3.8|F07C3.8	-0.212205	0.856401	0.91744	0.747621	0.61832	0.756659	-
srh-2|C05E4.14|C05E4.14c	0.146407	0.856186	0.91727	1.12641	0.313015	0.486395	-
C05B10.17|C05B10.17	-0.19414	0.856125	0.917244	-0.48074	0.73886	0.842472	-
F28H7.2|F28H7.2|F28H7.2	0.132366	0.856112	0.917244	0.654096	0.52015	0.679708	-
F59C6.10|F59C6.10	-0.110014	0.85602	0.917208	0.583001	0.461451	0.629444	-
K03D7.1|K03D7.1	0.017004	0.855924	0.917143	-0.19903	0.107911	0.231677	-
oac-59|C42C1.7|C42C1.7a	0.0453338	0.855776	0.917073	-0.336051	0.300928	0.474008	-
dao-5|C25A1.10|C25A1.10a	-0.0296955	0.855811	0.917073	-0.32855	0.119899	0.248806	-
aagr-1|D2096.3|D2096.3	0.0274691	0.855691	0.917073	-0.22098	0.258582	0.428634	-
rgs-7|F56B6.2|F56B6.2d	0.0448869	0.855822	0.917073	-0.00471788	0.988616	0.994005	-
srw-11|M01B2.11|M01B2.11	0.333671	0.855791	0.917073	0.282304	0.906969	NA	-
tag-164|Y76A2A.1|Y76A2A.1	0.0359822	0.855628	0.917057	0.514231	0.0454959	0.124445	-
R05D3.12|R05D3.12|R05D3.12a	0.0982487	0.855607	0.917057	0.706248	0.315678	0.489386	-
cpt-2|R07H5.2|R07H5.2b	0.0190706	0.855397	0.916921	-0.458715	0.000862951	0.00685139	-
Y38E10A.22|Y38E10A.22|Y38E10A.22	0.0272639	0.855429	0.916921	-0.39294	0.0451329	0.12377	-
H18N23.2|H18N23.2|H18N23.2a	0.0645253	0.855333	0.9169	-0.296035	0.545375	0.699966	-
C15H11.13|C15H11.13|C15H11.13	-0.0584926	0.855338	0.9169	0.545831	0.200492	0.358921	-
C14A11.11|C14A11.11	0.192581	0.855039	0.916657	-0.177701	0.900653	0.944093	-
glb-21|R102.9|R102.9	0.174054	0.854907	0.916554	0.0529593	0.964753	0.981805	-
K02C4.5|K02C4.5|K02C4.5	0.0466607	0.854765	0.91644	-0.114069	0.734857	0.839617	-
gpa-1|T19C4.6|T19C4.6a	-0.0582556	0.854685	0.916393	0.501112	0.235878	0.402077	-
gpa-1|T19C4.6|T19C4.6b	-0.0582556	0.854685	0.916393	0.501112	0.235878	0.402077	-
abf-5|T22H6.5|T22H6.5	0.0771188	0.854647	0.916393	0.997169	0.066818	0.164769	-
wsp-1|C07G1.4|C07G1.4b	-0.0244796	0.854437	0.91626	-0.146981	0.405608	0.578534	-
ZK973.12|ZK973.12	-0.1471	0.854454	0.91626	2.0423	0.0431464	0.120013	-
ZK973.16|ZK973.16	-0.1471	0.854454	0.91626	2.0423	0.0431464	0.120013	-
ZK973.18|ZK973.18	-0.1471	0.854454	0.91626	2.0423	0.0431464	0.120013	-
ZK973.21|ZK973.21	-0.1471	0.854454	0.91626	2.0423	0.0431464	0.120013	-
ZK973.22|ZK973.22	-0.1471	0.854454	0.91626	2.0423	0.0431464	0.120013	-
glh-4|T12F5.3|T12F5.3	-0.0234668	0.854071	0.916179	-0.318441	0.0539963	0.141135	-
mdt-15|R12B2.5|R12B2.5b	-0.0295324	0.854108	0.916179	-0.149513	0.476966	0.643252	-
rgs-7|F56B6.2|F56B6.2c	0.0427376	0.854163	0.916179	-0.0049402	0.98727	0.993425	-
R09D1.5|R09D1.5|R09D1.5	0.308761	0.854159	0.916179	3.45556	0.104054	0.225727	-
Y73B3A.9|Y73B3A.9|Y73B3A.9	-0.0514479	0.85394	0.916097	-0.565592	0.130893	0.264795	-
pqe-1|F52C9.8|F52C9.8a	0.0675855	0.853943	0.916097	-0.441915	0.371119	0.546018	-
C14F11.1|C14F11.1|C14F11.1b	-0.0278114	0.853694	0.915982	-0.447151	0.0222872	0.0740283	-
Y71H10B.1|Y71H10B.1|Y71H10B.1b	-0.0345954	0.853757	0.915982	-0.370302	0.128918	0.262012	-
Y49E10.7|Y49E10.7	0.0653124	0.853765	0.915982	0.800292	0.113361	0.239998	-
zyx-1|F42G4.3|F42G4.3b	0.0368785	0.853645	0.915969	-0.166183	0.521762	0.681228	-
cyn-13|Y116A8C.34|Y116A8C.34b	0.0416731	0.853612	0.915969	0.269314	0.353987	0.528657	-
F33H2.8|F33H2.8|F33H2.8b	0.125857	0.853572	0.915969	1.24897	0.206287	0.365721	-
F07F6.4|F07F6.4|F07F6.4	0.0507476	0.853526	0.915966	-0.33626	0.349007	0.523393	-
exos-7|F31D4.1|F31D4.1	-0.0362415	0.853535	0.915966	0.121369	0.631936	0.766692	-
C13C4.7|C13C4.7|C13C4.7	0.0520217	0.853514	0.915966	0.927046	0.0131413	0.0506355	-
C49F5.8|C49F5.8|C49F5.8	0.0729487	0.853384	0.91592	0.410002	0.441158	0.6115	-
K05B2.2|K05B2.2|K05B2.2b	0.0515766	0.853338	0.915909	0.0913112	0.805457	0.884208	-
F59A6.2|F59A6.2|F59A6.2	0.0615972	0.853274	0.915879	1.29892	0.0025992	0.0153839	-
srsx-35|F53F8.2|F53F8.2	0.243432	0.853214	0.915853	-0.785367	0.709109	NA	-
K06C4.17|K06C4.17|K06C4.17	0.0424322	0.853151	0.915824	0.307418	0.311603	0.485549	-
tag-172|E02H4.3|E02H4.3b	0.0613759	0.853068	0.915774	-0.624124	0.167889	0.315618	-
rpl-3|F13B10.2|F13B10.2a	0.0338429	0.852994	0.915774	-0.217573	0.356244	0.530711	-
dli-1|C39E9.14|C39E9.14b	-0.0261128	0.853037	0.915774	-0.149801	0.412183	0.584954	-
F08G12.11|F08G12.11|F08G12.11	-0.173582	0.852785	0.915774	-0.0956028	0.938703	0.967142	-
R09E10.6|R09E10.6|R09E10.6	-0.0288476	0.852895	0.915774	0.162131	0.420935	0.593324	-
clpp-1|ZK970.2	-0.0456719	0.852838	0.915774	0.2917	0.356188	0.530658	-
Y76B12C.8|Y76B12C.8|Y76B12C.8	-0.0501118	0.852954	0.915774	0.528328	0.134465	0.269904	-
T10B11.4|T10B11.4|T10B11.4	-0.0718802	0.853068	0.915774	0.959936	0.0512322	0.135527	-
K11H3.2|K11H3.2|K11H3.2	-0.0450845	0.852918	0.915774	1.02997	0.00120136	0.00875608	-
F07B7.1|F07B7.1|F07B7.1	-0.076374	0.852917	0.915774	1.13876	0.0783551	0.185102	-
W09B7.1|W09B7.1|W09B7.1	-0.076374	0.852917	0.915774	1.13876	0.0783551	0.185102	-
Y39A3CL.7|Y39A3CL.7|Y39A3CL.7a	0.0395327	0.852558	0.915649	-0.375268	0.176356	0.326556	-
Y56A3A.18|Y56A3A.18|Y56A3A.18	0.0343387	0.852508	0.915634	0.101336	0.670722	0.79442	-
Y106G6H.10|Y106G6H.10	0.0953506	0.852404	0.915561	0.760485	0.283117	0.454711	-
Y106G6H.9|Y106G6H.9|Y106G6H.9	0.0953506	0.852404	0.915561	0.760485	0.283117	0.454711	-
C33F10.8|C33F10.8|C33F10.8	0.0475295	0.852381	0.915561	0.890025	0.008522	0.0368081	-
dyn-1|C02C6.1|C02C6.1a	0.0710495	0.852214	0.915491	-0.874577	0.0910892	0.205792	-
faah-4|Y56A3A.12|Y56A3A.12a	-0.0245298	0.852232	0.915491	-0.295211	0.0843116	0.194644	-
lec-1|W09H1.6|W09H1.6b	0.0226024	0.852183	0.915491	-0.0308137	0.84488	0.910897	-
M6.4|M6.4|M6.4	-0.0955481	0.852198	0.915491	1.09613	0.109901	0.23478	-
trr-1|C47D12.1|C47D12.1c	0.0414822	0.85206	0.91546	-0.12271	0.6706	0.79439	-
Y105E8A.10|Y105E8A.10|Y105E8A.10c	-0.0234302	0.851994	0.915429	-0.174117	0.284322	0.456073	-
gta-1|K04D7.3|K04D7.3	0.0307375	0.851945	0.915414	-0.376002	0.0775061	0.183769	-
Y22D7AL.4|Y22D7AL.4|Y22D7AL.4	0.0847422	0.851913	0.915414	0.599606	0.318281	0.491928	-
Y59C2A.2|Y59C2A.2|Y59C2A.2	-0.0794473	0.851673	0.915199	-0.402214	0.486715	0.65192	-
ucr-2.2|T10B10.2|T10B10.2	-0.030047	0.851642	0.915199	-0.381505	0.0666897	0.164586	-
Y37H2A.14|Y37H2A.14|Y37H2A.14	-0.120546	0.851573	0.915169	1.91326	0.0221669	0.0737285	-
C39E9.8|C39E9.8|C39E9.8c	0.0416622	0.851388	0.915035	-0.315224	0.273626	0.444974	-
H18N23.2|H18N23.2|H18N23.2c	0.0662664	0.851413	0.915035	-0.296575	0.544529	0.69925	-
lipl-2|F46B6.8|F46B6.8	0.0927635	0.851288	0.915035	-0.139587	0.829341	0.90013	-
ZC13.10|ZC13.10|ZC13.10	0.100451	0.851322	0.915035	0.715467	0.348152	0.522613	-
med-1|T24D3.1|T24D3.1	-0.196116	0.851361	0.915035	2.06865	0.21304	0.374136	-
Y54F10AM.8|Y54F10AM.8|Y54F10AM.8	-0.0279356	0.851153	0.914948	-0.409343	0.034485	0.101582	-
mut-16|B0379.3|B0379.3b	-0.0304484	0.851145	0.914948	-0.216491	0.303505	0.477015	-
B0205.6|B0205.6|B0205.6	0.0317981	0.851048	0.914913	0.0575846	0.792345	0.875569	-
ztf-7|F46B6.7|F46B6.7	-0.0415389	0.850794	0.914677	-0.2403	0.400574	0.574353	-
ttr-8|R13A5.6|R13A5.6	-0.0684008	0.850712	0.914628	0.530543	0.258267	0.428257	-
cdka-1|T23F11.3|T23F11.3a	0.0706463	0.850546	0.914488	0.486225	0.32398	0.497478	-
ZC412.12|ZC412.12	-0.19514	0.850477	0.914452	1.41956	0.341258	0.515428	-
F17C11.20|F17C11.20	0.279417	0.850432	0.914442	1.1119	0.579105	NA	-
C18H7.11|C18H7.11|C18H7.11	0.0839669	0.850088	0.914111	0.909148	0.124335	0.25515	-
T22E5.1|T22E5.1|T22E5.1a	-0.0796462	0.850003	0.914058	1.08532	0.0392424	0.111686	-
Y71A12B.12|Y71A12B.12|Y71A12B.12a	0.0618052	0.849883	0.914002	-0.700811	0.100677	0.220546	-
odd-1|B0280.4|B0280.4	0.0817194	0.849888	0.914002	0.197406	0.735269	0.839813	-
gcy-20|F21H7.9|F21H7.9	0.137601	0.849915	0.914002	1.13133	0.261452	0.431555	-
srh-262|K10G4.7	-0.390122	0.8497	0.913886	-1.50958	0.573301	NA	-
T10H4.4|T10H4.4|T10H4.4	-0.169566	0.849672	0.913886	-1.24281	0.33302	0.506634	-
D2062.13|D2062.13|D2062.13	-0.0518292	0.849664	0.913886	0.757757	0.0344847	0.101582	-
let-716|C16A3.3|C16A3.3	-0.0394756	0.849513	0.913814	-0.781133	0.00382463	0.0204511	-
F43G6.11|F43G6.11|F43G6.11b	-0.0531032	0.849488	0.913814	-0.0263445	0.943439	0.969847	-
Y67D8B.2|Y67D8B.2|Y67D8B.2	-0.109137	0.849525	0.913814	0.761275	0.30181	0.475119	-
str-171|T01G5.5|T01G5.5	0.122433	0.849338	0.913728	0.271706	0.760935	0.85575	-
C55C3.6|C55C3.6|C55C3.6	0.066324	0.849308	0.913728	1.53373	0.000764024	0.00627723	-
C25F6.1|C25F6.1|C25F6.1	-0.0314596	0.84916	0.913613	-0.211771	0.327743	0.501151	-
clec-65|F35C5.8|F35C5.8	-0.0317553	0.849133	0.913613	0.162454	0.452214	0.621	-
sri-7|T06E6.4|T06E6.4	0.372629	0.84902	0.91354	1.2233	0.599228	0.742467	-
tbc-8|C38H2.1|C38H2.1	0.0435587	0.848824	0.913367	0.260192	0.413503	0.586249	-
H17B01.5|H17B01.5|H17B01.5	0.090402	0.848602	0.913167	0.367069	0.584084	0.730621	-
srh-229|C04F2.4|C04F2.4	0.213075	0.848532	0.913139	-0.26555	0.873222	0.927753	-
Y113G7C.1|Y113G7C.1|Y113G7C.1	-0.0546053	0.84854	0.913139	0.677339	0.0677874	0.166486	-
Y49F6C.7|Y49F6C.7|Y49F6C.7	-0.329207	0.848334	0.912994	2.51887	0.21303	0.374136	-
F28H7.7|F28H7.7|F28H7.7	-0.101821	0.848252	0.912944	0.283575	0.684382	0.804714	-
ZC395.4|ZC395.4|ZC395.4	-0.0538139	0.848235	0.912944	1.04323	0.00429823	0.0222059	-
nsy-1|F59A6.1|F59A6.1	-0.0461519	0.848157	0.912918	-0.147091	0.643778	0.774435	-
C25H3.9|C25H3.9|C25H3.9a	0.0292764	0.848152	0.912918	-0.107823	0.585201	0.731553	-
hsp-6|C37H5.8|C37H5.8	0.0312213	0.84788	0.912706	-0.194863	0.355414	0.530007	-
lpd-6|K09H9.6|K09H9.6	-0.0419074	0.847888	0.912706	0.199417	0.479591	0.645197	-
srxa-14|Y44A6B.1|Y44A6B.1	-0.240773	0.847749	0.912634	0.157117	0.924574	0.958243	-
sru-9|Y45F10B.11|Y45F10B.11	0.292451	0.847712	0.912632	-0.479042	0.815472	NA	-
coq-6|K07B1.2|K07B1.2	0.0307215	0.847674	0.91263	-0.254095	0.221014	0.383787	-
F11E6.1|F11E6.1|F11E6.1b	0.0449719	0.847533	0.912516	-0.416571	0.176496	0.326697	-
F36A2.14|F36A2.14|F36A2.14	0.0353869	0.847524	0.912516	0.113872	0.636025	0.769272	-
F20D6.10|F20D6.10|F20D6.10	-0.0690251	0.847372	0.91242	0.222777	0.647219	0.776859	-
mut-16|B0379.3|B0379.3a	-0.033758	0.847264	0.912367	-0.400236	0.0807702	0.188751	-
F25F2.1|F25F2.1|F25F2.1b	0.0390981	0.847238	0.912367	0.411382	0.124033	0.254715	-
C05C10.8|C05C10.8|C05C10.8	-0.166135	0.847287	0.912367	1.05803	0.237131	0.403323	-
Y105E8A.10|Y105E8A.10|Y105E8A.10b	-0.0243392	0.847174	0.91236	-0.1838	0.263771	0.433743	-
ser-1|F59C12.2|F59C12.2a	-0.0795209	0.846956	0.912164	-0.140933	0.802475	0.882218	-
Y57A10A.7|Y57A10A.7|Y57A10A.7	0.0289699	0.846878	0.912159	-0.18327	0.362656	0.537438	-
ugt-38|F10D2.7|F10D2.7	0.0871202	0.84681	0.912159	-0.0862142	0.883592	0.933877	-
lpr-2|T12A7.5|T12A7.5	-0.0379266	0.846908	0.912159	0.166093	0.52679	0.685028	-
F53E10.6|F53E10.6|F53E10.6	-0.0466676	0.846915	0.912159	0.355239	0.254744	0.42403	-
twk-6|F17C8.5|F17C8.5	0.0709117	0.846724	0.912107	1.1112	0.0269483	0.0845967	-
C06G8.3|C06G8.3|C06G8.3b	-0.0625306	0.846673	0.91209	-0.685089	0.107298	0.230726	-
W09D10.3|W09D10.3|W09D10.3	-0.0363095	0.84658	0.912054	0.044923	0.852803	0.915977	-
ZK218.11|ZK218.11|ZK218.11	0.224993	0.846604	0.912054	0.6406	0.732593	0.83824	-
Y57A10B.2|Y57A10B.2|Y57A10B.2	0.192369	0.846475	0.911992	0.393531	0.773112	0.864207	-
Y38C1AA.1|Y38C1AA.1|Y38C1AA.1b	0.113013	0.846164	0.911731	-1.2187	0.138355	0.275374	-
coh-3|F08H9.1|F08H9.1	-0.0365875	0.846052	0.911731	-0.600886	0.0148272	0.0553578	-
egl-27|C04A2.3|C04A2.3a	-0.0957655	0.84589	0.911731	-0.505495	0.439591	0.610155	-
T26A5.2|T26A5.2|T26A5.2a	-0.0543789	0.846125	0.911731	-0.388257	0.287325	0.459453	-
T01C8.10|T01C8.10	0.0780245	0.846196	0.911731	-0.316866	0.582385	0.729074	-
W01C8.1|W01C8.1|W01C8.1	0.0436745	0.846107	0.911731	-0.300928	0.304591	0.478242	-
Y39A3CR.9|Y39A3CR.9|Y39A3CR.9	0.045654	0.846179	0.911731	-0.0236296	0.938618	0.967142	-
K08C7.6|K08C7.6|K08C7.6	-0.0450498	0.846076	0.911731	0.15344	0.608991	0.749643	-
aqp-3|Y69E1A.7|Y69E1A.7	-0.0769021	0.845815	0.911731	0.571569	0.260797	0.43101	-
nhr-107|C33G8.11|C33G8.11	-0.059906	0.846197	0.911731	0.708523	0.0756271	0.180509	-
C25F9.8|C25F9.8|C25F9.8	0.31219	0.845938	0.911731	1.26057	0.495242	NA	-
fbxa-14|Y82E9BL.10|Y82E9BL.10	0.0943267	0.845932	0.911731	1.27571	0.0424244	0.11851	-
ash-2|Y17G7B.2|Y17G7B.2a	-0.0528327	0.84576	0.911722	-0.598768	0.0941399	0.210335	-
Y94H6A.7|Y94H6A.7|Y94H6A.7	-0.0523749	0.845746	0.911722	-0.556816	0.129021	0.262151	-
nhr-23|C01H6.5|C01H6.5a	-0.0693584	0.845719	0.911722	-0.513607	0.291869	0.464028	-
ppk-3|VF11C1L.1|VF11C1L.1	-0.0271962	0.845702	0.911722	-0.294994	0.10989	0.234776	-
ubc-3|Y71G12B.15|Y71G12B.15	-0.0510073	0.845605	0.911708	-0.261619	0.441061	0.6114	-
F47D12.9|F47D12.9|F47D12.9a	0.0671657	0.845561	0.9117	-0.113838	0.79937	0.879824	-
ptr-24|F46G10.5|F46G10.5b	-0.0272982	0.845444	0.911624	-0.512785	0.00542977	0.0262037	-
abts-3|F57F10.1|F57F10.1c	0.0391692	0.845455	0.911624	0.173309	0.526217	0.684719	-
F14B6.6|F14B6.6|F14B6.6a	0.0690937	0.845375	0.911614	-0.500158	0.287775	0.459934	-
srx-126|T08G3.9	-0.300114	0.845322	0.911596	-0.332306	0.868014	NA	-
rpl-3|F13B10.2|F13B10.2d	0.0338953	0.845255	0.911562	-0.176641	0.430888	0.602251	-
F25F2.1|F25F2.1|F25F2.1a	0.0391369	0.845171	0.91151	0.397907	0.132809	0.267567	-
F39C12.4|F39C12.4|F39C12.4	-0.0525058	0.845129	0.911503	0.282984	0.413033	0.585719	-
lgc-35|Y46G5A.26|Y46G5A.26b	0.0710588	0.845103	0.911503	1.01039	0.0431023	0.120013	-
galt-1|M03F8.4|M03F8.4	0.0730057	0.845053	0.911498	-0.0240373	0.962058	0.980756	-
C27C12.4|C27C12.4|C27C12.4	0.0313818	0.844816	0.911281	0.0984865	0.637757	0.770174	-
ugt-17|C08B6.1|C08B6.1a	0.0594451	0.844705	0.9112	-1.10276	0.00545464	0.0262699	-
C06G8.3|C06G8.3|C06G8.3c	0.0567631	0.844622	0.911149	-0.590069	0.119906	0.248806	-
F40G9.2|F40G9.2|F40G9.2	-0.0538788	0.844568	0.911129	0.125243	0.722094	0.831697	-
srg-21|Y25C1A.9|Y25C1A.9	0.34437	0.844428	0.911016	-1.03606	0.671505	NA	-
sgcb-1|K01A2.1|K01A2.1	0.0385904	0.844321	0.91094	-0.246789	0.339355	0.51347	-
clec-75|Y46C8AL.9|Y46C8AL.9c	-0.0958128	0.844082	0.910721	-1.01076	0.13954	0.277014	-
sel-2|F10F2.1|F10F2.1	-0.0483745	0.843897	0.910575	-0.376822	0.239122	0.405661	-
D2062.1|D2062.1|D2062.1	-0.0409859	0.843912	0.910575	0.84682	0.00207694	0.0130216	-
H01M10.1|H01M10.1|H01M10.1	0.0515024	0.843831	0.910565	-0.261447	0.450693	0.619674	-
eat-6|B0365.3|B0365.3	-0.0324194	0.843652	0.91041	-0.502244	0.018089	0.0636578	-
aqp-12|Y57A10A.35|Y57A10A.35	-0.0358777	0.843394	0.91017	-0.126962	0.587489	0.733292	-
F54B11.8|F54B11.8|F54B11.8	-0.0769687	0.843379	0.91017	0.158066	0.764502	0.857814	-
F25E2.2|F25E2.2|F25E2.2a	0.0261223	0.843208	0.910047	-0.00800801	0.962636	0.980909	-
let-381|F26B1.7|F26B1.7	0.0768553	0.843153	0.910047	0.309918	0.555588	0.707477	-
end-3|F58E10.5|F58E10.5	0.119778	0.843196	0.910047	0.681313	0.418431	0.59114	-
F23F1.7|F23F1.7|F23F1.7	-0.0570247	0.843018	0.909988	-0.19176	0.608816	0.749577	-
math-37|R52.9|R52.9	0.270585	0.843047	0.909988	0.241426	0.895684	NA	-
nas-40|F54B8.13	0.27341	0.842751	0.909745	2.25708	0.174468	0.324088	-
H17B01.t1|H17B01.t1	-0.219373	0.842695	0.909723	-1.81064	0.264753	0.434813	-
F56A8.3|F56A8.3|F56A8.3b	-0.0598507	0.842659	0.909723	-0.91635	0.0187807	0.0654337	-
F08G12.5|F08G12.5|F08G12.5	0.0757845	0.842542	0.909635	0.695407	0.155753	0.299975	-
nhr-133|F44C8.8|F44C8.8	0.0623849	0.842485	0.909612	0.866972	0.0331395	0.0984871	-
dpy-27|R13G10.1|R13G10.1	-0.0359568	0.842423	0.909583	-0.604099	0.011695	0.0465163	-
M163.5|M163.5|M163.5	0.195561	0.842293	0.909482	-0.542542	0.680303	0.801579	-
F46A8.5|F46A8.5|F46A8.5	-0.182154	0.842138	0.909353	1.25367	0.231388	0.396885	-
C03C10.2|C03C10.2|C03C10.2	0.0553074	0.842056	0.909303	1.06496	0.00328648	0.0183119	-
C35B8.3|C35B8.3|C35B8.3a	-0.053248	0.841935	0.90921	-0.1788	0.604634	0.745964	-
Y71G12B.8|Y71G12B.8|Y71G12B.8	0.0332592	0.84182	0.909124	-0.237318	0.273126	0.444454	-
srab-14|R10H1.2|R10H1.2b	0.159957	0.841791	0.909124	1.23693	0.292444	0.464732	-
C05C8.8|C05C8.8|C05C8.8	-0.106735	0.841744	0.909119	-0.498705	0.480137	0.645683	-
Y104H12D.4|Y104H12D.4|Y104H12D.4	0.035676	0.841687	0.909096	-0.00192646	0.993323	0.996168	-
srg-51|Y40H7A.8|Y40H7A.8	0.232792	0.841621	0.909063	0.0261002	0.98649	0.993006	-
T22E7.1|T22E7.1|T22E7.1b	-0.0551678	0.841527	0.909	-0.202889	0.57726	0.725236	-
C51E3.10|C51E3.10|C51E3.10a	0.053173	0.841475	0.908982	0.781263	0.0238267	0.0776136	-
R04E5.8|R04E5.8|R04E5.8a	-0.0457218	0.841422	0.908963	-0.170349	0.575502	0.724115	-
spp-15|C48E7.10|C48E7.10	0.0523699	0.841389	0.908963	0.411585	0.221873	0.384707	-
F10G2.1|F10G2.1|F10G2.1	0.0410838	0.841336	0.908947	0.202767	0.444424	0.614396	-
W04B5.3|W04B5.3|W04B5.3a	-0.0646547	0.841261	0.908905	0.745821	0.0750048	0.179486	-
C18A3.3|C18A3.3|C18A3.3	0.0357712	0.841205	0.908905	0.0367845	0.873267	0.927761	-
F02D8.1|F02D8.1|F02D8.1	-0.139871	0.841225	0.908905	1.03737	0.284631	0.456395	-
pps-1|T14G10.1|T14G10.1	-0.0541952	0.841113	0.908893	-0.847123	0.0155103	0.0571518	-
ddx-19|T07D4.4|T07D4.4e	0.0415951	0.841089	0.908893	-0.586078	0.0291542	0.0895729	-
C15C6.3|C15C6.3|C15C6.3	-0.0601979	0.841143	0.908893	-0.187041	0.638484	0.770691	-
C17G10.9|C17G10.9|C17G10.9b	0.0433665	0.84097	0.908821	-0.407813	0.145435	0.285459	-
C33G3.6|C33G3.6|C33G3.6	-0.0386333	0.840944	0.908821	-0.0713058	0.776763	0.866268	-
chch-3|M176.3|M176.3	-0.0361845	0.840895	0.908817	-0.19443	0.403926	0.577259	-
fbxb-22|Y56A3A.10|Y56A3A.10	0.164244	0.840874	0.908817	0.216903	0.842406	0.909325	-
glt-3|K08F4.4|K08F4.4	0.0367853	0.840822	0.908815	0.013269	0.957726	0.97824	-
C08H9.1|C08H9.1|C08H9.1	0.0758677	0.840803	0.908815	0.131815	0.79682	0.878145	-
F52E10.2|F52E10.2|F52E10.2	-0.276008	0.840672	0.90873	-0.31686	0.862181	NA	-
C33H5.18|C33H5.18|C33H5.18a	-0.0659192	0.840594	0.908684	-0.385773	0.364436	0.539262	-
prx-3|C15H9.8|C15H9.8a	-0.0435802	0.840577	0.908684	-0.318563	0.264044	0.434024	-
K09E9.1|K09E9.1|K09E9.1	-0.0501252	0.840524	0.908684	0.00899037	0.978003	0.988857	-
B0213.22|B0213.22	-0.277455	0.840304	0.908486	-0.42285	0.815066	NA	-
R06B9.5|R06B9.5|R06B9.5	0.0724617	0.840186	0.908397	-0.389228	0.421703	0.5941	-
M02B1.3|M02B1.3|M02B1.3	-0.0371508	0.840044	0.908282	-0.462929	0.0533771	0.139934	-
F54B3.4|F54B3.4|F54B3.4	-0.100213	0.839936	0.908203	0.146107	0.835478	0.904855	-
ape-1|F46F3.4|F46F3.4b	0.0455457	0.8399	0.908203	-0.683303	0.0206852	0.0701312	-
hif-1|F38A6.3|F38A6.3d	-0.0708845	0.839829	0.908164	-0.62446	0.193262	0.349263	-
apa-2|T20B5.1|T20B5.1	-0.0653711	0.839823	0.908164	-0.362448	0.390209	0.564477	-
T26G10.1|T26G10.1|T26G10.1	0.029416	0.839745	0.908151	0.134613	0.474112	0.640848	-
M117.8|M117.8	-0.0526363	0.83966	0.908098	-0.33983	0.331832	0.50527	-
F29G6.3|F29G6.3|F29G6.3c	0.0259501	0.839241	0.907683	-0.408111	0.0138661	0.0527325	-
clec-82|Y54G2A.8|Y54G2A.8b	-0.131576	0.839137	0.907669	-0.456515	0.59471	0.739072	-
D2092.5|D2092.5|D2092.5	0.0655329	0.83915	0.907669	-0.184443	0.679505	0.80111	-
sec-23|Y113G7A.3|Y113G7A.3	0.0349837	0.839189	0.907669	-0.0486296	0.827493	0.899086	-
T25G3.3|T25G3.3|T25G3.3	0.0275988	0.839193	0.907669	0.0251088	0.886368	0.935361	-
vps-18|W06B4.3|W06B4.3	-0.0540088	0.839148	0.907669	0.051728	0.880268	0.932027	-
smf-3|Y69A2AR.4|Y69A2AR.4	-0.0643476	0.839009	0.907662	-0.745996	0.091651	0.206775	-
aak-2|T01C8.1|T01C8.1b	0.0486671	0.838805	0.907662	-0.507837	0.112395	0.238425	-
F58E10.3|F58E10.3|F58E10.3a	0.031105	0.838732	0.907662	-0.412699	0.0365799	0.10604	-
srv-5|F48D6.2|F48D6.2b	-0.156173	0.838993	0.907662	-0.0729208	0.953132	0.975845	-
ksr-2|F58D5.4|F58D5.4b	0.087798	0.838742	0.907662	-0.0624963	0.913593	0.951673	-
Y49F6B.2|Y49F6B.2|Y49F6B.2	-0.0330561	0.838731	0.907662	0.0407555	0.84581	0.911378	-
Y51H4A.15|Y51H4A.15|Y51H4A.15a	-0.0417125	0.838991	0.907662	0.118475	0.654541	0.782432	-
Y37E11B.10|Y37E11B.10|Y37E11B.10b	0.0278075	0.838718	0.907662	0.336971	0.0606649	0.153432	-
F55G7.3|F55G7.3|F55G7.3	0.332076	0.838959	0.907662	0.584387	0.786228	NA	-
K10C9.1|K10C9.1|K10C9.1	-0.0613852	0.838941	0.907662	0.711401	0.0618313	0.15558	-
acdh-5|C37A2.3|C37A2.3	0.0475924	0.83879	0.907662	0.755805	0.0129492	0.0501269	-
Y45G5AM.4|Y45G5AM.4|Y45G5AM.4	0.292559	0.838995	0.907662	2.52728	0.188051	NA	-
C50F4.17|C50F4.17	0.422701	0.838735	0.907662	4.15468	0.116123	0.243972	-
K07E3.2|K07E3.2|K07E3.2	-0.0414307	0.838527	0.90764	0.217373	0.405755	0.578665	-
egl-4|F55A8.2|F55A8.2d	0.0461266	0.838461	0.907608	-0.32851	0.296679	0.469848	-
H20E11.3|H20E11.3|H20E11.3a	-0.0419911	0.838329	0.907503	-0.410559	0.13935	0.276781	-
Y44A6D.7|Y44A6D.7|Y44A6D.7	0.143427	0.838141	0.907338	0.973187	0.297284	0.470504	-
sru-16|Y45F10B.4|Y45F10B.4	0.372378	0.837941	0.90716	1.8731	0.440509	NA	-
efa-6|Y55D9A.1|Y55D9A.1c	-0.0406924	0.837776	0.90702	-0.826457	0.00148232	0.0102352	-
str-7|F22B8.5|F22B8.5	0.0706502	0.83772	0.90702	-0.5966	0.205275	0.364665	-
R02F2.2|R02F2.2|R02F2.2	-0.0632661	0.83777	0.90702	0.106359	0.798916	0.879547	-
F26B1.2|F26B1.2|F26B1.2b	-0.0889612	0.837619	0.906965	-0.717376	0.205336	0.364719	-
cyn-1|Y49A3A.5|Y49A3A.5	0.0390373	0.837507	0.906882	0.0357143	0.884459	0.934218	-
F58F9.8|F58F9.8|F58F9.8	0.222438	0.837486	0.906882	0.329878	0.778814	0.867222	-
nurf-1|F26H11.2|F26H11.2i	-0.0481339	0.837337	0.906775	-0.509654	0.0942124	0.210445	-
bath-18|F40B1.2	-0.0931132	0.837172	0.906635	-0.211171	0.753984	0.851981	-
nhr-95|Y39B6A.17|Y39B6A.17b	-0.0385711	0.837118	0.906614	0.33462	0.171485	0.320498	-
M4.1|M4.1|M4.1	-0.071189	0.837065	0.906596	0.00890088	0.984678	0.992242	-
C11H1.7|C11H1.7|C11H1.7	0.0617736	0.836919	0.906476	0.174174	0.642418	0.773518	-
prp-8|C50C3.6|C50C3.6	0.0335323	0.836606	0.90621	-0.383679	0.0690149	0.1688	-
C09H10.7|C09H10.7|C09H10.7	0.0702149	0.836638	0.90621	-0.275977	0.551891	0.705221	-
T05E12.6|T05E12.6|T05E12.6b	-0.0631973	0.836513	0.906152	-0.713871	0.07162	0.173433	-
dpy-6|F16F9.2|F16F9.2	-0.0963723	0.836394	0.906061	-0.353252	0.567303	0.717663	-
rgs-5|B0336.4|B0336.4b	0.0424604	0.836347	0.906048	-0.355558	0.192127	0.347908	-
C53A3.1|C53A3.1|C53A3.1	0.145127	0.836294	0.906029	-0.715109	0.437735	0.608922	-
cyn-13|Y116A8C.34|Y116A8C.34a	0.0307619	0.836136	0.905897	0.00938432	0.961017	0.980195	-
F36A2.10|F36A2.10|F36A2.10	0.0364516	0.836126	0.905897	0.316535	0.164774	0.311676	-
M02F4.9|M02F4.9	0.179349	0.836123	0.905897	0.427682	0.697798	0.81438	-
F42G8.16|F42G8.16	0.4204	0.836049	0.905897	0.580145	0.827707	NA	-
F07A11.1|F07A11.1|F07A11.1	0.110337	0.835988	0.905897	1.34354	0.0594403	0.151161	-
srsx-31|F07B10.6|F07B10.6	0.338801	0.836079	0.905897	3.05258	0.144897	NA	-
F13H8.12|F13H8.12|F13H8.12	-0.0449312	0.835917	0.90589	0.699225	0.0126771	0.0494134	-
F42G10.1|F42G10.1|F42G10.1	-0.0355226	0.835858	0.905873	-0.239016	0.283058	0.454705	-
dpf-4|F01F1.5|F01F1.5	-0.0267558	0.835866	0.905873	-0.0992341	0.552091	0.705367	-
srd-34|F32G8.1|F32G8.1	0.32577	0.835831	0.905873	0.729245	0.703202	NA	-
sams-5|T13A10.11|T13A10.11a	-0.0310808	0.835758	0.905872	0.342187	0.0784696	0.185283	-
F26B1.2|F26B1.2|F26B1.2c	-0.0934018	0.835601	0.90574	-0.754051	0.195757	0.352504	-
F41E6.5|F41E6.5|F41E6.5b	-0.0313086	0.835467	0.905636	-0.156877	0.423499	0.595516	-
ser-3|K02F2.6|K02F2.6	-0.0665715	0.835469	0.905636	0.20226	0.632214	0.766803	-
T06D8.5|T06D8.5|T06D8.5	-0.0291425	0.835375	0.90561	-0.605612	0.000876326	0.0069195	-
gtl-1|C05C12.3|C05C12.3	0.0574929	0.835296	0.905562	-0.163773	0.64934	0.778605	-
F59C6.14|F59C6.14|F59C6.14a	0.0561783	0.835266	0.905562	0.62274	0.0734582	0.176803	-
C08F1.10|C08F1.10|C08F1.10	0.295625	0.835105	0.905459	-1.83056	0.304529	0.478236	-
R13H4.6|R13H4.6|R13H4.6	0.312422	0.835129	0.905459	0.37251	0.831992	0.902035	-
ugt-39|F10D2.2|F10D2.2a	-0.0873033	0.834989	0.905384	0.790555	0.142344	0.280988	-
Y41D4B.14|Y41D4B.14|Y41D4B.14	-0.0616372	0.834881	0.905305	0.271552	0.499025	0.662514	-
srb-14|C33C12.6	0.14649	0.834767	0.905251	-0.809217	0.397027	0.570841	-
vha-15|T14F9.1|T14F9.1	0.0338393	0.834796	0.905251	-0.216589	0.30244	0.475808	-
K11H12.12|K11H12.12	0.312475	0.834756	0.905251	0.165207	0.933692	0.963947	-
glb-19|F56C4.3|F56C4.3b	-0.0577956	0.834689	0.90525	-0.430825	0.261217	0.431356	-
stn-1|F30A10.8|F30A10.8b	0.0399449	0.8346	0.905193	0.357895	0.147993	0.289	-
K08E5.9|K08E5.9	-0.475131	0.834498	0.90512	-0.382469	0.896494	NA	-
F30F8.9|F30F8.9|F30F8.9a	-0.0389363	0.834278	0.90492	-0.603627	0.01304	0.0503639	-
mon-2|F11A10.4|F11A10.4	-0.0511671	0.83424	0.904917	-0.103649	0.74512	0.846401	-
pat-12|T17H7.4|T17H7.4k	0.0700392	0.834073	0.904816	-0.307384	0.480294	0.645814	-
srp-3|Y32G9A.4|Y32G9A.4	0.046429	0.834111	0.904816	0.241185	0.436623	0.607874	-
F36F12.7|F36F12.7|F36F12.7	-0.0533588	0.834097	0.904816	0.419025	0.216568	0.378235	-
[truncated: 24,081 more rows]
