# Supplementary material for: A-to-I RNA Editing Affects lncRNAs Expression after Heat Shock
Source: Preprints.org preprint supplement (doi:10.20944/preprints201811.0177.v1), 2018-11-07
Supplement: Supplementary file 2 [file Supplementary Material File S2.xlsx]

## Sheet: Downregulated HS genes 
ace-2|Y44E3A.2|Y44E3A.2
acs-2|F28F8.2|F28F8.2
atg-13|D2007.5|D2007.5
atg-18|F41E6.13|F41E6.13a
atg-18|F41E6.13|F41E6.13b
C03A7.13|C03A7.13|C03A7.13
C03B1.7|C03B1.7|C03B1.7
C06A5.1|C06A5.1|C06A5.1
C06A5.3|C06A5.3|C06A5.3a
C06A5.3|C06A5.3|C06A5.3b
C06A6.2|C06A6.2|C06A6.2a
C06A6.2|C06A6.2|C06A6.2b
C06G8.3|C06G8.3
C06G8.3|C06G8.3|C06G8.3b
C10C5.4|C10C5.4|C10C5.4
C13F10.6|C13F10.6|C13F10.6
C17H12.2|C17H12.2|C17H12.2
C25A1.5|C25A1.5|C25A1.5
C30G12.6|C30G12.6|C30G12.6a
C30G12.6|C30G12.6|C30G12.6b
C31C9.6|C31C9.6|C31C9.6
C32D5.6|C32D5.6|C32D5.6
C38C3.4|C38C3.4|C38C3.4b
cca-1|C54D2.5|C54D2.5a
cca-1|C54D2.5|C54D2.5c
cca-1|C54D2.5|C54D2.5d
cca-1|C54D2.5|C54D2.5e
cca-1|C54D2.5|C54D2.5f
clec-223|C03E10.5|C03E10.5
clec-54|F08H9.8|F08H9.8
clec-7|F10G2.3|F10G2.3
crml-1|K07G5.1|K07G5.1
cul-5|ZK856.1|ZK856.1
D1046.3|D1046.3|D1046.3
D2030.2|D2030.2|D2030.2a
D2030.2|D2030.2|D2030.2b
daao-1|Y69A2AR.5|Y69A2AR.5
daf-3|F25E2.5|F25E2.5b
daf-3|F25E2.5|F25E2.5c
DH11.2|DH11.2|DH11.2
dhs-18|C45B11.3|C45B11.3
duo-3|Y106G6H.12|Y106G6H.12
evl-14|H38K22.1|H38K22.1
F02H6.3|F02H6.3|F02H6.3a
F02H6.3|F02H6.3|F02H6.3b
F10D11.2|F10D11.2|F10D11.2
F10E9.12|F10E9.12|F10E9.12
F13B12.6|F13B12.6|F13B12.6
F16B3.3|F16B3.3|F16B3.3a
F16B3.3|F16B3.3|F16B3.3b
F17C11.4|F17C11.4|F17C11.4
F18F11.5|F18F11.5|F18F11.5
F20D12.2|F20D12.2|F20D12.2
F26A1.13|F26A1.13|F26A1.13
F28B3.5|F28B3.5|F28B3.5a
F28B3.5|F28B3.5|F28B3.5b
F35G2.1|F35G2.1|F35G2.1a
F35G2.1|F35G2.1|F35G2.1b
F43C11.7|F43C11.7|F43C11.7
F47B10.9|F47B10.9|F47B10.9
F49C12.7|F49C12.7|F49C12.7a
F49C12.7|F49C12.7|F49C12.7b
F49C12.7|F49C12.7|F49C12.7c
F56C9.10|F56C9.10|F56C9.10a
F56C9.10|F56C9.10|F56C9.10b
fbxa-124|Y53C10A.7
fnci-1|W02D3.10|W02D3.10a
gbh-2|M05D6.7|M05D6.7
glc-1|F11A5.10|F11A5.10
gld-2|ZC308.1|ZC308.1a
gld-2|ZC308.1|ZC308.1d
gon-2|T01H8.5|T01H8.5a
gon-2|T01H8.5|T01H8.5c
gon-2|T01H8.5|T01H8.5d
gon-2|T01H8.5|T01H8.5e
hpk-1|F20B6.8|F20B6.8a
hrdl-1|F26E4.11|F26E4.11
icl-1|C01F6.8|C01F6.8a
icl-1|C01F6.8|C01F6.8b
imp-1|C36B1.12|C36B1.12c
imp-3|C33H5.11|C33H5.11
K02D7.1|K02D7.1|K02D7.1
K09H11.1|K09H11.1|K09H11.1
K12B6.9|K12B6.9|K12B6.9
let-502|C10H11.9|C10H11.9
lgg-2|ZK593.6|ZK593.6a
lgg-2|ZK593.6|ZK593.6b
lin-23|K10B2.1|K10B2.1
lin-45|Y73B6A.5|Y73B6A.5a
lin-45|Y73B6A.5|Y73B6A.5b
lin-49|F42A9.2|F42A9.2
M02E1.1|M02E1.1|M02E1.1a
M02E1.1|M02E1.1|M02E1.1b
math-45|Y51H7BM.1|Y51H7BM.1
mdt-15|R12B2.5|R12B2.5b
mfb-1|DY3.6|DY3.6
mig-1|Y34D9B.1|Y34D9B.1a
mig-1|Y34D9B.1|Y34D9B.1b
mom-5|T23D8.1|T23D8.1
mtk-1|B0414.7|B0414.7a
mtm-5|H28G03.6|H28G03.6
mys-4|C34B7.4|C34B7.4
nhr-117|F16B4.12|F16B4.12b
nhr-176|F14H3.11|F14H3.11
nhr-59|T27B7.1|T27B7.1
nhx-2|B0495.4|B0495.4
npr-20|T07D4.1|T07D4.1
pap-1|Y32F6A.3|Y32F6A.3
pkc-1|F57F5.5|F57F5.5
R07E4.1|R07E4.1|R07E4.1a
R07E4.1|R07E4.1|R07E4.1b
R12E2.2|R12E2.2|R12E2.2
rad-50|T04H1.4|T04H1.4a
rad-50|T04H1.4|T04H1.4b
rev-1|ZK675.2|ZK675.2
sma-9|T05A10.1|T05A10.1a
sma-9|T05A10.1|T05A10.1c
sma-9|T05A10.1|T05A10.1d
sma-9|T05A10.1|T05A10.1e
sma-9|T05A10.1|T05A10.1f
sma-9|T05A10.1|T05A10.1i
sma-9|T05A10.1|T05A10.1j
smk-1|F41E6.4|F41E6.4a
T01D3.6|T01D3.6|T01D3.6a
T01D3.6|T01D3.6|T01D3.6b
T01E8.1|T01E8.1|T01E8.1
T04H1.2|T04H1.2|T04H1.2
T05E12.3|T05E12.3|T05E12.3
T12G3.2|T12G3.2|T12G3.2a
T12G3.2|T12G3.2|T12G3.2b
T12G3.2|T12G3.2|T12G3.2c
T12G3.2|T12G3.2|T12G3.2d
T12G3.2|T12G3.2|T12G3.2e
T13F2.6|T13F2.6|T13F2.6
T16G1.7|T16G1.7|T16G1.7
T19C4.5|T19C4.5|T19C4.5a
T19C4.5|T19C4.5|T19C4.5b
T24B1.1|T24B1.1|T24B1.1
taf-1|W04A8.7|W04A8.7
tag-253|C37C3.8|C37C3.8a
tag-253|C37C3.8|C37C3.8b
tps-2|F19H8.1|F19H8.1
tre-1|F57B10.7|F57B10.7
ugt-4|ZC455.5
ugt-4|ZC455.5|ZC455.5a
ugt-54|T25B9.7|T25B9.7
wrm-1|B0336.1|B0336.1
xpg-1|F57B10.6|F57B10.6
Y105C5A.1|Y105C5A.1|Y105C5A.1
Y19D10A.16|Y19D10A.16|Y19D10A.16
Y19D10B.4|Y19D10B.4|Y19D10B.4
Y20C6A.1|Y20C6A.1|Y20C6A.1a
Y20C6A.1|Y20C6A.1|Y20C6A.1b
Y32F6A.4|Y32F6A.4|Y32F6A.4
Y44A6C.1|Y44A6C.1|Y44A6C.1
Y50D7A.8|Y50D7A.8|Y50D7A.8
Y57A10A.1|Y57A10A.1|Y57A10A.1
Y69A2AR.12|Y69A2AR.12|Y69A2AR.12
Y71H2AM.3|Y71H2AM.3|Y71H2AM.3
Y7A9C.1|Y7A9C.1
ZK550.2|ZK550.2|ZK550.2
ZK863.4|ZK863.4|ZK863.4
C53A5.6|C53A5.6|C53A5.6a
C53A5.6|C53A5.6|C53A5.6b
amx-1|R13G10.2|R13G10.2
asm-2|ZK455.4|ZK455.4
B0001.2|B0001.2|B0001.2
C10C5.5|C10C5.5|C10C5.5
C17E4.3|C17E4.3|C17E4.3
C27A12.6|C27A12.6|C27A12.6
C34D4.10|C34D4.10|C34D4.10
cam-1|C01G6.8|C01G6.8a
cam-1|C01G6.8|C01G6.8b
cam-1|C01G6.8|C01G6.8c
cpr-1|C52E4.1|C52E4.1
cpsf-2|F09G2.4|F09G2.4
cyb-2.2|H31G24.4|H31G24.4
eri-7|C41D11.7|C41D11.7
F02H6.2|F02H6.2|F02H6.2
F14H3.6|F14H3.6|F14H3.6
F16D3.4|F16D3.4|F16D3.4
F17C11.10|F17C11.10|F17C11.10
F28A12.4|F28A12.4|F28A12.4
F32D8.12|F32D8.12|F32D8.12a
F32D8.12|F32D8.12|F32D8.12b
F32D8.12|F32D8.12|F32D8.12c
fbxa-215|Y45F10C.3|Y45F10C.3
gon-4|K04D7.5|K04D7.5a
gon-4|K04D7.5|K04D7.5b
imp-1|C36B1.12|C36B1.12a
imp-1|C36B1.12|C36B1.12b
K02C4.3|K02C4.3|K02C4.3
K07B1.7|K07B1.7|K07B1.7a
K07B1.7|K07B1.7|K07B1.7b
math-38|T07H3.3|T07H3.3
mel-26|ZK858.4|ZK858.4
mom-4|F52F12.3|F52F12.3
polk-1|F22B7.6|F22B7.6a
polk-1|F22B7.6|F22B7.6b
prg-2|C01G5.2|C01G5.2
R193.2|R193.2|R193.2
sid-1|C04F5.1|C04F5.1
smc-5|C27A2.1|C27A2.1
T01C3.3|T01C3.3|T01C3.3
T10E9.2|T10E9.2|T10E9.2
T23B12.6|T23B12.6|T23B12.6
tag-52|C02F12.4|C02F12.4
toe-2|C56E6.3|C56E6.3a
toe-2|C56E6.3|C56E6.3b
W03D8.8|W03D8.8|W03D8.8
Y42H9AR.4|Y42H9AR.4|Y42H9AR.4
ZC376.6|ZC376.6|ZC376.6
ZK809.5|ZK809.5|ZK809.5a
ZK809.5|ZK809.5|ZK809.5b
ZK822.5|ZK822.5|ZK822.5a
ZK822.5|ZK822.5|ZK822.5b
ztf-15|R06C7.9|R06C7.9a
ztf-15|R06C7.9|R06C7.9b
Y71F9AL.10|Y71F9AL.10|Y71F9AL.10
C27H5.4|C27H5.4|C27H5.4a
C27H5.4|C27H5.4|C27H5.4b
C56C10.11|C56C10.11|C56C10.11
clec-218|W02D7.2|W02D7.2
dod-3|C24B9.9|C24B9.9
ego-1|F26A3.3|F26A3.3
F19F10.9|F19F10.9|F19F10.9
F31C3.3|F31C3.3|F31C3.3
F34D10.4|F34D10.4|F34D10.4
F55C12.5|F55C12.5|F55C12.5a
F55C12.5|F55C12.5|F55C12.5b
F55C12.5|F55C12.5|F55C12.5c
hum-1|F29D10.4|F29D10.4
lem-3|F42H11.2|F42H11.2
M03C11.8|M03C11.8|M03C11.8
mtk-1|B0414.7|B0414.7b
R09H10.5|R09H10.5|R09H10.5
rde-1|K08H10.7|K08H10.7
C38C3.4|C38C3.4|C38C3.4a
clec-47|T09F5.9|T09F5.9
D1086.5|D1086.5|D1086.5
F13C5.1|F13C5.1|F13C5.1
ist-1|C54D1.3|C54D1.3
K10D3.6|K10D3.6|K10D3.6
nhr-90|ZK488.2|ZK488.2
ZK632.2|ZK632.2|ZK632.2

## Sheet: Upregulated HS genes
act-1|T04C12.6|T04C12.6
alp-1|T11B7.4|T11B7.4a
alp-1|T11B7.4|T11B7.4b
alp-1|T11B7.4|T11B7.4c
alp-1|T11B7.4|T11B7.4d
alp-1|T11B7.4|T11B7.4e
asg-2|C53B7.4|C53B7.4
B0457.6|B0457.6|B0457.6
bli-2|F59E12.12|F59E12.12
brp-1|Y79H2A.1|Y79H2A.1a
brp-1|Y79H2A.1|Y79H2A.1b
C01B10.3|C01B10.3|C01B10.3
C06A8.3|C06A8.3|C06A8.3
C11H1.9|C11H1.9|C11H1.9a
C11H1.9|C11H1.9|C11H1.9b
C13A2.12|C13A2.12|C13A2.12
C14B4.2|C14B4.2|C14B4.2
C18B2.3|C18B2.3|C18B2.3
C29F5.1|C29F5.1|C29F5.1
C30C11.4|C30C11.4|C30C11.4
C30E1.9|C30E1.9
C31C9.2|C31C9.2|C31C9.2
C33G8.4|C33G8.4|C33G8.4
C36C5.12|C36C5.12|C36C5.12
C36C5.5|C36C5.5|C36C5.5
C44C1.1|C44C1.1|C44C1.1
C50A2.3|C50A2.3|C50A2.3
C51E3.9|C51E3.9|C51E3.9
C52D10.1|C52D10.1|C52D10.1
C52D10.3|C52D10.3|C52D10.3
C53C9.2|C53C9.2|C53C9.2
C53D6.7|C53D6.7|C53D6.7
C54D10.10|C54D10.10|C54D10.10
C54E4.5|C54E4.5|C54E4.5
catp-3|C09H5.2|C09H5.2a
CC8.2|CC8.2|CC8.2b
cdd-1|C47D2.2|C47D2.2
cdo-1|F56F10.3|F56F10.3
clh-4|T06F4.2|T06F4.2b
cls-2|R107.6|R107.6
cnc-3|R09B5.8|R09B5.8
cnc-8|F41E7.8|F41E7.8
col-102|C18H7.3|C18H7.3
col-146|T06E4.6|T06E4.6
col-159|F57B1.3|F57B1.3
col-2|W01B6.7|W01B6.7
col-40|T13B5.4|T13B5.4
col-50|T28F2.6|T28F2.6
col-51|T28F2.8|T28F2.8
col-92|W05B2.6|W05B2.6
col-94|W05B2.1|W05B2.1
col-96|Y41C4A.19|Y41C4A.19
cor-1|R01H10.3|R01H10.3a
cor-1|R01H10.3|R01H10.3b
cor-1|R01H10.3|R01H10.3c
cor-1|R01H10.3|R01H10.3d
cpg-9|Y67D8C.8|Y67D8C.8
cpin-1|F38E11.3|F38E11.3
cpn-3|F28H1.2|F28H1.2
cpn-4|F49D11.8|F49D11.8
crt-1|Y38A10A.5|Y38A10A.5
cyn-5|F31C3.1|F31C3.1
D2092.4|D2092.4|D2092.4
dhs-9|Y32H12A.3|Y32H12A.3
dim-1|C18A11.7|C18A11.7a
dim-1|C18A11.7|C18A11.7b
dpy-9|T21D12.2|T21D12.2
E01G4.3|E01G4.3|E01G4.3a
E01G4.3|E01G4.3|E01G4.3b
eef-1B.1|F54H12.6|F54H12.6
eif-3.J|Y40B1B.5|Y40B1B.5
elks-1|F42A6.9|F42A6.9
F09B12.3|F09B12.3|F09B12.3
F13D12.3|F13D12.3|F13D12.3
F13E9.12|F13E9.12|F13E9.12
F16B4.4|F16B4.4|F16B4.4
F19B2.5|F19B2.5|F19B2.5
F20A1.1|F20A1.1|F20A1.1
F20A1.10|F20A1.10|F20A1.10
F25E2.2|F25E2.2|F25E2.2a
F25E2.2|F25E2.2|F25E2.2b
F31A3.3|F31A3.3|F31A3.3
F31D4.8|F31D4.8|F31D4.8
F32A5.4|F32A5.4|F32A5.4a
F36A2.3|F36A2.3|F36A2.3
F36D1.7|F36D1.7|F36D1.7
F37H8.5|F37H8.5|F37H8.5
F44E5.1|F44E5.1|F44E5.1
F45D11.2|F45D11.2
F45D11.3|F45D11.3
F45D11.4|F45D11.4
F45H10.2|F45H10.2|F45H10.2
F46H5.3|F46H5.3|F46H5.3a
F46H5.3|F46H5.3|F46H5.3b
F47B3.3|F47B3.3|F47B3.3
F52B11.2|F52B11.2|F52B11.2
F56H9.2|F56H9.2|F56H9.2
F57G8.5|F57G8.5|F57G8.5
F58F12.1|F58F12.1|F58F12.1
far-1|F02A9.2|F02A9.2
far-2|F02A9.3|F02A9.3
far-6|W02A2.2|W02A2.2
fbxa-151|ZC47.7|ZC47.7
fbxa-18|F10A3.3|F10A3.3
fbxa-78|Y119D3B.19|Y119D3B.19
fip-2|T27E4.4|T27E4.4
fipr-5|C12D8.18|C12D8.18
fipr-9|C12D8.19|C12D8.19
gln-1|C45B2.5|C45B2.5
grl-20|C23H5.9|C23H5.9
grl-25|ZK643.8|ZK643.8
grsp-1|Y43F8C.20|Y43F8C.20
gst-1|R107.7|R107.7
gst-20|Y48E1B.10|Y48E1B.10
gstk-1|ZK1320.1|ZK1320.1
gyg-1|F56B6.4|F56B6.4a
gyg-1|F56B6.4|F56B6.4b
gyg-1|F56B6.4|F56B6.4c
H05L03.3|H05L03.3|H05L03.3
H40L08.2|H40L08.2
H40L08.2|H40L08.2|H40L08.2a
H40L08.2|H40L08.2|H40L08.2b
har-1|C16C10.11|C16C10.11
heh-1|R148.6|R148.6
his-35|C50F4.13|C50F4.13
his-38|K03A1.6|K03A1.6
his-40|K03A1.1
his-41|C50F4.5|C50F4.5
hsp-1|F26D10.3|F26D10.3
hsp-12.1|T22A3.2|T22A3.2a
hsp-12.1|T22A3.2|T22A3.2b
hsp-3|C15H9.6|C15H9.6
ifa-1|F38B2.1|F38B2.1a
ife-2|R04A9.4|R04A9.4
immp-1|C24H11.6|C24H11.6
ins-27|ZC334.11|ZC334.11
ins-33|W09C5.4|W09C5.4
inx-18|C18H7.2|C18H7.2b
K01A11.1|K01A11.1|K01A11.1
K02E11.10|K02E11.10|K02E11.10
K03E5.2|K03E5.2|K03E5.2a
K03E5.2|K03E5.2|K03E5.2b
K03E5.2|K03E5.2|K03E5.2c
K03E5.2|K03E5.2|K03E5.2d
K05C4.2|K05C4.2|K05C4.2
K08A2.1|K08A2.1|K08A2.1
K08E7.8|K08E7.8|K08E7.8a
K08E7.8|K08E7.8|K08E7.8b
K12B6.11|K12B6.11|K12B6.11
kel-8|W02G9.2|W02G9.2
lec-5|ZK1248.16|ZK1248.16
lev-11|Y105E8B.1|Y105E8B.1a
lev-11|Y105E8B.1|Y105E8B.1b
lev-11|Y105E8B.1|Y105E8B.1c
lev-11|Y105E8B.1|Y105E8B.1d
lev-11|Y105E8B.1|Y105E8B.1e
lev-11|Y105E8B.1|Y105E8B.1f
lgc-34|T27A1.4|T27A1.4
lips-15|Y38E10A.7|Y38E10A.7
M01G12.8|M01G12.8
M02D8.1|M02D8.1|M02D8.1
M04G7.1|M04G7.1|M04G7.1
mbf-1|H21P03.1|H21P03.1
mdt-26|C25H3.6|C25H3.6b
mec-12|C44B11.3|C44B11.3
mec-7|ZK154.3|ZK154.3
mlc-1|C36E6.3|C36E6.3
mlc-2|C36E6.5|C36E6.5
mlc-3|F09F7.2|F09F7.2a
mlc-3|F09F7.2|F09F7.2b
mup-2|T22E5.5|T22E5.5
myo-2|T18D3.4|T18D3.4
myo-3|K12F2.1|K12F2.1
ncx-2|C10G8.5|C10G8.5a
ncx-2|C10G8.5|C10G8.5b
ndx-1|T26E3.2|T26E3.2
nhr-31|C26B2.3|C26B2.3b
nhr-31|C26B2.3|C26B2.3c
nlp-24|F35B12.7|F35B12.7
nrf-5|F55B12.5|F55B12.5
nspc-16|D1025.6|D1025.6
nspc-19|D1025.9|D1025.9
nspc-20|D1025.4|D1025.4
nurf-1|F26H11.2|F26H11.2e
nurf-1|F26H11.2|F26H11.2f
nurf-1|F26H11.2|F26H11.2g
odc-1|K11C4.4|K11C4.4
pfn-3|K03E6.6|K03E6.6
pqn-44|F55A12.9|F55A12.9d
pqn-75|W03D2.1|W03D2.1a
pqn-75|W03D2.1|W03D2.1b
pqn-75|W03D2.1|W03D2.1c
pvf-1|Y39A3CL.6|Y39A3CL.6
R05H10.1|R05H10.1|R05H10.1
R107.5|R107.5|R107.5a
R107.5|R107.5|R107.5b
rla-1|Y37E3.7|Y37E3.7
rpl-11.2|F07D10.1|F07D10.1
rpl-18|Y45F10D.12|Y45F10D.12
rpl-21|C14B9.7|C14B9.7
rpl-25.1|F55D10.2|F55D10.2
rpl-26|F28C6.7|F28C6.7a
rpl-26|F28C6.7|F28C6.7b
rpl-26|F28C6.7|F28C6.7c
rpl-28|R11D1.8|R11D1.8
rpl-31|W09C5.6|W09C5.6a
rpl-31|W09C5.6|W09C5.6b
rpl-33|F10E7.7|F10E7.7
rpl-34|C42C1.14|C42C1.14
rpl-36|F37C12.4|F37C12.4
rpl-41|C09H10.2|C09H10.2
rpl-5|F54C9.5|F54C9.5
rps-12|F54E7.2|F54E7.2
rps-13|C16A3.9|C16A3.9
rps-14|F37C12.9|F37C12.9
rps-16|T01C3.6|T01C3.6
rps-18|Y57G11C.16|Y57G11C.16
rps-21|F37C12.11|F37C12.11
rps-22|F53A3.3|F53A3.3a
rps-22|F53A3.3|F53A3.3b
rps-26|F39B2.6|F39B2.6
rps-27|F56E10.4|F56E10.4
rps-7|ZC434.2|ZC434.2
rps-9|F40F8.10|F40F8.10
rrn-2.1|F31C3.11
scp-1|D2013.8|D2013.8a
scp-1|D2013.8|D2013.8b
set-18|T22A3.4|T22A3.4b
sqt-3|F23H12.4|F23H12.4
srh-71|T10D4.5|T10D4.5
T02B11.3|T02B11.3|T02B11.3a
T05B11.1|T05B11.1|T05B11.1
T05C1.3|T05C1.3|T05C1.3
T06E6.10|T06E6.10|T06E6.10
T10C6.15|T10C6.15|T10C6.15
T12D8.9|T12D8.9|T12D8.9a
T12D8.9|T12D8.9|T12D8.9b
T19B10.2|T19B10.2|T19B10.2
T20B6.3|T20B6.3|T20B6.3
T21B6.3|T21B6.3|T21B6.3
T21G5.2|T21G5.2|T21G5.2
T25F10.6|T25F10.6|T25F10.6a
T25F10.6|T25F10.6|T25F10.6b
tag-18|T14G12.3|T14G12.3
tni-1|F42E11.4|F42E11.4
tni-3|T20B3.2|T20B3.2
tnt-2|F53A9.10|F53A9.10b
tnt-4|T08B1.2|T08B1.2a
ttll-12|D2013.9|D2013.9
ttr-16|Y5F2A.1|Y5F2A.1
ttr-18|B0334.1|B0334.1
ttr-20|F36A4.8|F36A4.8
ttr-59|T08A9.11|T08A9.11b
ttr-6|T28B4.3|T28B4.3
ubl-1|H06I04.4|H06I04.4a
ubl-1|H06I04.4|H06I04.4b
ubq-2|ZK1010.1|ZK1010.1
unc-15|F07A5.7|F07A5.7a
unc-15|F07A5.7|F07A5.7b
unc-27|ZK721.2|ZK721.2
W01D2.1|W01D2.1|W01D2.1
W03F9.1|W03F9.1|W03F9.1
W08F4.5|W08F4.5|W08F4.5
W09G12.9|W09G12.9|W09G12.9
Y19D10B.6|Y19D10B.6|Y19D10B.6
Y1A5A.1|Y1A5A.1|Y1A5A.1
Y37A1A.2|Y37A1A.2|Y37A1A.2
Y37A1B.7|Y37A1B.7|Y37A1B.7
Y37D8A.2|Y37D8A.2|Y37D8A.2
Y37D8A.5|Y37D8A.5|Y37D8A.5
Y37E11B.7|Y37E11B.7|Y37E11B.7
Y38C1AA.9|Y38C1AA.9|Y38C1AA.9
Y38E10A.28|Y38E10A.28|Y38E10A.28
Y39G8B.1|Y39G8B.1|Y39G8B.1a
Y39G8B.1|Y39G8B.1|Y39G8B.1b
Y43F8B.1|Y43F8B.1|Y43F8B.1a
Y43F8B.1|Y43F8B.1|Y43F8B.1b
Y43F8B.1|Y43F8B.1|Y43F8B.1c
Y43F8B.1|Y43F8B.1|Y43F8B.1d
Y43F8B.1|Y43F8B.1|Y43F8B.1e
Y43F8B.2|Y43F8B.2|Y43F8B.2a
Y43F8B.2|Y43F8B.2|Y43F8B.2c
Y43F8B.2|Y43F8B.2|Y43F8B.2d
Y43F8B.2|Y43F8B.2|Y43F8B.2e
Y43F8B.2|Y43F8B.2|Y43F8B.2f
Y45F10B.13|Y45F10B.13|Y45F10B.13a
Y45F10B.13|Y45F10B.13|Y45F10B.13b
Y45F10B.13|Y45F10B.13|Y45F10B.13c
Y53H1B.2|Y53H1B.2|Y53H1B.2
Y55F3AM.13|Y55F3AM.13|Y55F3AM.13
Y59C2A.1|Y59C2A.1|Y59C2A.1
Y71H2B.4|Y71H2B.4|Y71H2B.4
Y94H6A.10|Y94H6A.10|Y94H6A.10
ZK1290.5|ZK1290.5|ZK1290.5
ZK1307.1|ZK1307.1|ZK1307.1a
ZK1307.1|ZK1307.1|ZK1307.1b
ZK896.3|ZK896.3
nhr-31|C26B2.3|C26B2.3a
aagr-4|F52D1.1|F52D1.1
B0205.13|B0205.13|B0205.13
B0238.12|B0238.12|B0238.12
C02E7.6|C02E7.6|C02E7.6
C13G3.1|C13G3.1|C13G3.1
C14F11.6|C14F11.6|C14F11.6
C18D11.1|C18D11.1|C18D11.1
C26F1.1|C26F1.1|C26F1.1a
C26F1.1|C26F1.1|C26F1.1b
C47E8.11|C47E8.11|C47E8.11
cdr-4|K01D12.11|K01D12.11
col-10|B0222.8|B0222.8
col-117|T28C6.4|T28C6.4
col-118|T11B7.3|T11B7.3a
col-118|T11B7.3|T11B7.3b
col-12|F15H10.1|F15H10.1
col-120|Y11D7A.11|Y11D7A.11
col-125|C29F4.1|C29F4.1
col-126|F54D1.2|F54D1.2
col-127|F54D1.3|F54D1.3
col-13|F15H10.2|F15H10.2
col-133|F52B11.4|F52B11.4
col-144|B0222.6|B0222.6
col-150|B0024.2|B0024.2
col-154|F55C10.2|F55C10.2
col-155|F55C10.3|F55C10.3
col-157|T11F9.9|T11F9.9
col-166|T07H6.3|T07H6.3a
col-166|T07H6.3|T07H6.3b
col-167|T10E10.2|T10E10.2
col-168|T10E10.1|T10E10.1
col-169|T10E10.5|T10E10.5
col-170|T10E10.6|T10E10.6
col-176|ZC373.7|ZC373.7
col-180|C44C10.1|C44C10.1
col-3|T28C6.6|T28C6.6
col-34|F36A4.10|F36A4.10
col-68|C50D2.4|C50D2.4
cyp-14A5|F08F3.7|F08F3.7
dao-2|M03A1.7|M03A1.7
dur-1|F25H8.5|F25H8.5a
dur-1|F25H8.5|F25H8.5b
dur-1|F25H8.5|F25H8.5c
dur-1|F25H8.5|F25H8.5d
dur-1|F25H8.5|F25H8.5e
dur-1|F25H8.5|F25H8.5f
F20D1.3|F20D1.3|F20D1.3
F21F8.11|F21F8.11|F21F8.11
F37C4.5|F37C4.5|F37C4.5a
F37C4.5|F37C4.5|F37C4.5b
F39D8.7|F39D8.7
F53F1.4|F53F1.4|F53F1.4
F57H12.6|F57H12.6|F57H12.6
fil-2|K12B6.3|K12B6.3
gst-24|F37B1.1|F37B1.1
his-18|K06C4.10|K06C4.10
his-19|K06C4.11|K06C4.11
his-21|K06C4.3|K06C4.3
his-22|K06C4.12|K06C4.12
his-27|K06C4.13|K06C4.13
his-28|K06C4.2|K06C4.2
his-3|T10C6.12|T10C6.12
his-49|F07B7.5|F07B7.5
his-5|F45F2.3|F45F2.3
his-50|F07B7.9|F07B7.9
his-51|F07B7.10|F07B7.10
his-52|F07B7.4|F07B7.4
his-53|F07B7.3|F07B7.3
his-6|F45F2.13|F45F2.13
his-7|F45F2.4|F45F2.4
hsp-16.1|T27E4.8|T27E4.8
hsp-16.11|T27E4.2|T27E4.2
hsp-16.2|Y46H3A.3|Y46H3A.3
hsp-4|F43E2.8|F43E2.8
inx-18|C18H7.2|C18H7.2a
lin-33|H32C10.2|H32C10.2
lpr-6|W04G3.1|W04G3.1a
lpr-6|W04G3.1|W04G3.1b
nlp-31|B0213.6|B0213.6
osm-7|T05D4.4|T05D4.4a
osm-7|T05D4.4|T05D4.4b
pgp-1|K08E7.9|K08E7.9
pqn-60|R11G11.7|R11G11.7
ram-2|F38A3.2|F38A3.2
rol-6|T01B7.7|T01B7.7
sqt-1|B0491.2|B0491.2
srr-4|K11D12.3|K11D12.3a
srr-4|K11D12.3|K11D12.3b
T06E4.5|T06E4.5|T06E4.5
T19C4.1|T19C4.1|T19C4.1
T20D4.10|T20D4.10|T20D4.10
T20D4.7|T20D4.7|T20D4.7
T27F6.8|T27F6.8|T27F6.8
W02D9.10|W02D9.10|W02D9.10
Y38H8A.3|Y38H8A.3|Y38H8A.3
Y43F8B.2|Y43F8B.2|Y43F8B.2b
Y50E8A.12|Y50E8A.12|Y50E8A.12a
Y50E8A.12|Y50E8A.12|Y50E8A.12b
Y51H7C.13|Y51H7C.13|Y51H7C.13
Y54G2A.18|Y54G2A.18|Y54G2A.18
Y57A10A.23|Y57A10A.23|Y57A10A.23
ZK546.7|ZK546.7|ZK546.7
ZK909.3|ZK909.3|ZK909.3
col-62|C15A11.6|C15A11.6
col-7|C15A11.5|C15A11.5
elo-8|Y47D3A.30|Y47D3A.30
F10D7.3|F10D7.3|F10D7.3
fbxa-54|T12B5.2|T12B5.2
fipr-4|C12D8.14|C12D8.14
fipr-6|C12D8.17|C12D8.17
fipr-7|C12D8.16|C12D8.16
fipr-8|C12D8.6|C12D8.6
msp-42|F26G1.8
R05D7.1|R05D7.1|R05D7.1
ttr-59|T08A9.11|T08A9.11a
Y82E9BR.13|Y82E9BR.13|Y82E9BR.13
Y9C9A.8|Y9C9A.8|Y9C9A.8
aip-1|F58E10.4|F58E10.4
B0034.1|B0034.1|B0034.1
C05C8.7|C05C8.7|C05C8.7
C05D9.3|C05D9.3|C05D9.3
C45B2.2|C45B2.2|C45B2.2
C49G7.3|C49G7.3|C49G7.3
chw-1|F22E12.2|F22E12.2
csq-1|F40E10.3|F40E10.3
dpy-2|T14B4.6|T14B4.6
dpy-3|EGAP7.1|EGAP7.1
dpy-7|F46C8.6|F46C8.6
dpy-8|C31H2.2|C31H2.2
F28H1.4|F28H1.4|F28H1.4a
F28H1.4|F28H1.4|F28H1.4b
F32A5.4|F32A5.4|F32A5.4b
F38B7.2|F38B7.2|F38B7.2a
F38B7.2|F38B7.2|F38B7.2b
F41C3.2|F41C3.2|F41C3.2
F41E6.12|F41E6.12|F41E6.12
fkb-3|C05C8.3|C05C8.3
fmo-3|Y39A1A.19|Y39A1A.19
gly-8|Y66A7A.6|Y66A7A.6
hsp-70|C12C8.1|C12C8.1
M162.5|M162.5|M162.5
nspe-1|Y38E10A.13|Y38E10A.13
nurf-1|F26H11.2|F26H11.2c
nurf-1|F26H11.2|F26H11.2d
nurf-1|F26H11.2|F26H11.2h
osm-11|F11C7.5|F11C7.5
ost-1|C44B12.2|C44B12.2
pdi-2|C07A12.4|C07A12.4a
pdi-2|C07A12.4|C07A12.4b
pdi-2|C07A12.4|C07A12.4c
pqn-44|F55A12.9|F55A12.9a
pqn-44|F55A12.9|F55A12.9b
pqn-44|F55A12.9|F55A12.9c
R07E3.4|R07E3.4|R07E3.4
R07E5.4|R07E5.4|R07E5.4
set-18|T22A3.4|T22A3.4a
srx-58|C29F3.6|C29F3.6
T10G3.3|T10G3.3|T10G3.3a
T10G3.3|T10G3.3|T10G3.3b
tag-320|B0403.4|B0403.4
unc-54|F11C3.3|F11C3.3
ZC239.6|ZC239.6|ZC239.6
ZC250.4|ZC250.4|ZC250.4
C02E7.7|C02E7.7|C02E7.7
C04G6.2|C04G6.2|C04G6.2
C42D4.3|C42D4.3|C42D4.3
C45B2.8|C45B2.8|C45B2.8
ckb-2|B0285.9|B0285.9
cnc-4|R09B5.9|R09B5.9
col-104|F58F6.1|F58F6.1
col-107|C34H4.4|C34H4.4a
col-107|C34H4.4|C34H4.4b
col-109|Y38C1BA.3|Y38C1BA.3
col-130|F08G5.4|F08G5.4
col-137|Y51H4A.9|Y51H4A.9
col-138|C52D10.13|C52D10.13
col-14|C46A5.3|C46A5.3a
col-14|C46A5.3|C46A5.3b
col-145|B0222.7|B0222.7
col-152|F32G8.5|F32G8.5
col-156|F57B7.3|F57B7.3
col-161|C50B6.4|C50B6.4
col-162|Y2H9A.3|Y2H9A.3
col-17|F11G11.10|F11G11.10
col-175|C35B8.1|C35B8.1
col-183|F02D10.1|F02D10.1
col-33|F36A4.6|F36A4.6
col-36|C27H5.5|C27H5.5
col-38|F54C9.4|F54C9.4
col-46|Y18H1A.13|Y18H1A.13
col-48|Y54E10BL.2|Y54E10BL.2
col-49|K09H9.3|K09H9.3
col-54|F33D11.3|F33D11.3
col-58|F26B1.4|F26B1.4
col-60|F22D6.10|F22D6.10
col-63|ZK265.2|ZK265.2
col-65|K08C9.4|K08C9.4
col-66|F15D3.3|F15D3.3
col-71|Y49F6B.10|Y49F6B.10
col-73|F11G11.12|F11G11.12
col-77|M195.1|M195.1
col-88|W05G11.3|W05G11.3
col-89|F17C8.2|F17C8.2
col-91|F09G8.6|F09G8.6
col-97|ZK1010.7|ZK1010.7
dpy-13|F30B5.1|F30B5.1
dpy-18|Y47D3B.10|Y47D3B.10
dpy-4|Y41E3.2|Y41E3.2
dpy-5|F27C1.8|F27C1.8
F08G2.5|F08G2.5|F08G2.5
F15B9.8|F15B9.8|F15B9.8
F26G1.5|F26G1.5|F26G1.5
F36H9.5|F36H9.5|F36H9.5
F41F3.3|F41F3.3|F41F3.3
F44E5.4|F44E5.4|F44E5.4
F44E5.5|F44E5.5|F44E5.5
F46C8.8|F46C8.8|F46C8.8
F58E6.13|F58E6.13|F58E6.13
F59C12.4|F59C12.4|F59C12.4
fkb-4|ZC455.10|ZC455.10
grl-15|Y75B8A.20|Y75B8A.20
grl-27|F40C5.3|F40C5.3
H42K12.3|H42K12.3|H42K12.3
hsp-16.41|Y46H3A.2|Y46H3A.2
hsp-16.48|T27E4.3|T27E4.3
hsp-16.49|T27E4.9|T27E4.9
K01A6.7|K01A6.7|K01A6.7
K01D12.9|K01D12.9|K01D12.9
K02E2.8|K02E2.8|K02E2.8a
K02E2.8|K02E2.8|K02E2.8b
K10H10.4|K10H10.4|K10H10.4
mdt-26|C25H3.6|C25H3.6c
MTCE.33|MTCE.33
MTCE.7|MTCE.7
nlp-25|Y43F8C.1|Y43F8C.1
nlp-30|B0213.5|B0213.5
nlp-34|B0213.17|B0213.17
nspe-7|Y38E10A.15|Y38E10A.15
ptr-18|Y38F1A.3|Y38F1A.3
R11A5.3|R11A5.3|R11A5.3
R12C12.10|R12C12.10|R12C12.10
R12E2.14|R12E2.14|R12E2.14
R12E2.15|R12E2.15|R12E2.15
R12E2.6|R12E2.6|R12E2.6
R12E2.7|R12E2.7|R12E2.7
rol-1|Y57A10A.11|Y57A10A.11
rol-8|ZK1290.3|ZK1290.3a
rol-8|ZK1290.3|ZK1290.3b
sqt-2|C01B12.1|C01B12.1
Y41C4A.11|Y41C4A.11|Y41C4A.11
Y47D3B.6|Y47D3B.6|Y47D3B.6
Y47D7A.13|Y47D7A.13|Y47D7A.13
Y47D7A.15|Y47D7A.15|Y47D7A.15
Y53F4B.8|Y53F4B.8
Y71G12B.18|Y71G12B.18|Y71G12B.18
Y71H2AM.15|Y71H2AM.15|Y71H2AM.15a
Y71H2AM.15|Y71H2AM.15|Y71H2AM.15b
ZC21.10|ZC21.10|ZC21.10
ZK180.5|ZK180.5|ZK180.5a
ZK180.5|ZK180.5|ZK180.5b
ZK180.5|ZK180.5|ZK180.5c
ZK84.1|ZK84.1|ZK84.1
fbxa-88|F10A3.2|F10A3.2
